# Supplementary material for: Synthesis and characterization of heterometallic complexes involving coinage metals and isoelectronic Fe(CO)5, [Mn(CO)5]−and [Fe(CO)4CN]−ligands
Source: Royal Society of Chemistry journal article supplement (doi:10.1039/d0dt01590c), 2020-01-01
Supplement: d0dt01590c1.pdf [file d0dt01590c1.pdf]

## Supporting Information for

# Synthesis and characterization of heterometallic complexes involving coinage metals and isoelectronic $\text{Fe}(\text{CO})_5$ , $[\text{Mn}(\text{CO})_5]^-$ and $[\text{Fe}(\text{CO})_4\text{CN}]^-$ ligands

Tharun Teja Ponduru,<sup>1</sup> Guocang Wang,<sup>1</sup> Sai Manoj,<sup>2</sup> Sudip Pan,<sup>2</sup> Lili Zhao,<sup>3</sup> Gernot Frenking,<sup>2,3\*</sup> H. V. Rasika Dias<sup>1\*</sup>

<sup>1</sup>Department of Chemistry and Biochemistry, The University of Texas at Arlington, Arlington, Texas 76019, USA

<sup>2</sup>Fachbereich Chemie, Philipps-Universität Marburg, Hans-Meerwein-Straße, 35032 Marburg, Germany

<sup>3</sup>Institute of Advanced Synthesis, School of Chemistry and Molecular Engineering, Jiangsu National Synergetic Innovation Center for Advanced Materials, Nanjing Tech University, Nanjing 211816, China

|                                                       |            |
|-------------------------------------------------------|------------|
| <b>Theoretical Methods</b>                            | <b>2</b>   |
| <b>Theoretical Data</b>                               | <b>4</b>   |
| <b>Bridge asymmetry parameter</b>                     | <b>49</b>  |
| <b>NMR and IR spectroscopic data</b>                  | <b>50</b>  |
| <b>Additional details on X-ray crystal structures</b> | <b>75</b>  |
| <b>References</b>                                     | <b>100</b> |

## Theoretical methods

The geometry optimization followed by calculation of the vibrational frequencies were performed at the BP86-D3(BJ)/def2-SVP level.<sup>[1]</sup> Small-core effective core potentials were used for Ag and Au whereas all-electron basis sets were employed for the other metal atoms. All calculated complexes are minima on the potential energy surfaces as ensured by the absence of any imaginary frequency. All these calculations were carried out with Gaussian 16 program package.<sup>[2]</sup> The NBO analysis<sup>[3]</sup> were performed to evaluate the partial charge using NBO 6.0 program.<sup>[4]</sup>

The bonding situations were analyzed by means of an energy decomposition analysis (EDA)<sup>[5]</sup> together with the natural orbitals for chemical valence (NOCV)<sup>[6]</sup> method by using the ADF 2018.105 program package.<sup>[7]</sup> The EDA-NOCV calculations were carried out at the BP86-D3(BJ)/TZ2P-ZORA level<sup>[8]</sup> using the BP86-D3(BJ)/def2-SVP optimized geometries. In this analysis, the intrinsic interaction energy ( $\Delta E_{\text{int}}$ ) between two fragments can be divided into three energy components as follows:

$$\Delta E_{\text{int}} = \Delta E_{\text{elstat}} + \Delta E_{\text{Pauli}} + \Delta E_{\text{orb}} + \Delta E_{\text{disp}} \quad (1).$$

While the electrostatic  $\Delta E_{\text{elstat}}$  term represents the quasiclassical electrostatic interaction between the unperturbed charge distributions of the prepared fragments, the Pauli repulsion  $\Delta E_{\text{Pauli}}$  corresponds to the energy change associated with the transformation from the superposition of the unperturbed electron densities of the isolated fragments to the wavefunction, which properly obeys the Pauli principle through explicit antisymmetrization and renormalization of the production wavefunction. Since we included D3(BJ), it provides us with the dispersion interaction energy between two interacting fragments. The orbital term  $\Delta E_{\text{orb}}$  is originated from the mixing of orbitals, charge transfer and polarization between the isolated fragments, which can be further decomposed into contributions from each irreducible representation of the point group of the interacting system as follows:

$$\Delta E_{\text{orb}} = \sum_r \Delta E_r \quad (2)$$

The combination of the EDA with NOCV enables the partition of the total orbital interactions into pairwise contributions of the orbital interactions which is very vital to get a complete picture of the bonding. The charge deformation  $\Delta\rho_k(r)$ , resulting from the mixing of the orbital pairs  $\psi_k(r)$  and  $\psi_{-k}(r)$  of the interacting fragments presents the amount and the shape of the charge flow due to the orbital interactions (Equation 3), and the associated energy term  $\Delta E_{orb}$  provides with the size of stabilizing orbital energy originated from such interaction (Equation 4).

$$\Delta\rho_{orb}(r) = \sum_k \Delta\rho_k(r) = \sum_{k=1}^{N/2} v_k [-\psi_{-k}^2(r) + \psi_k^2(r)] \quad (3)$$

$$\Delta E_{orb} = \sum_k \Delta E_k^{orb} = \sum_{k=1}^{N/2} v_k [-F_{-k,-k}^{TS} + F_{k,k}^{TS}] \quad (4)$$

More details about the EDA-NOCV method and its application are given in recent reviews articles.<sup>[9]</sup>

## Theoretical data

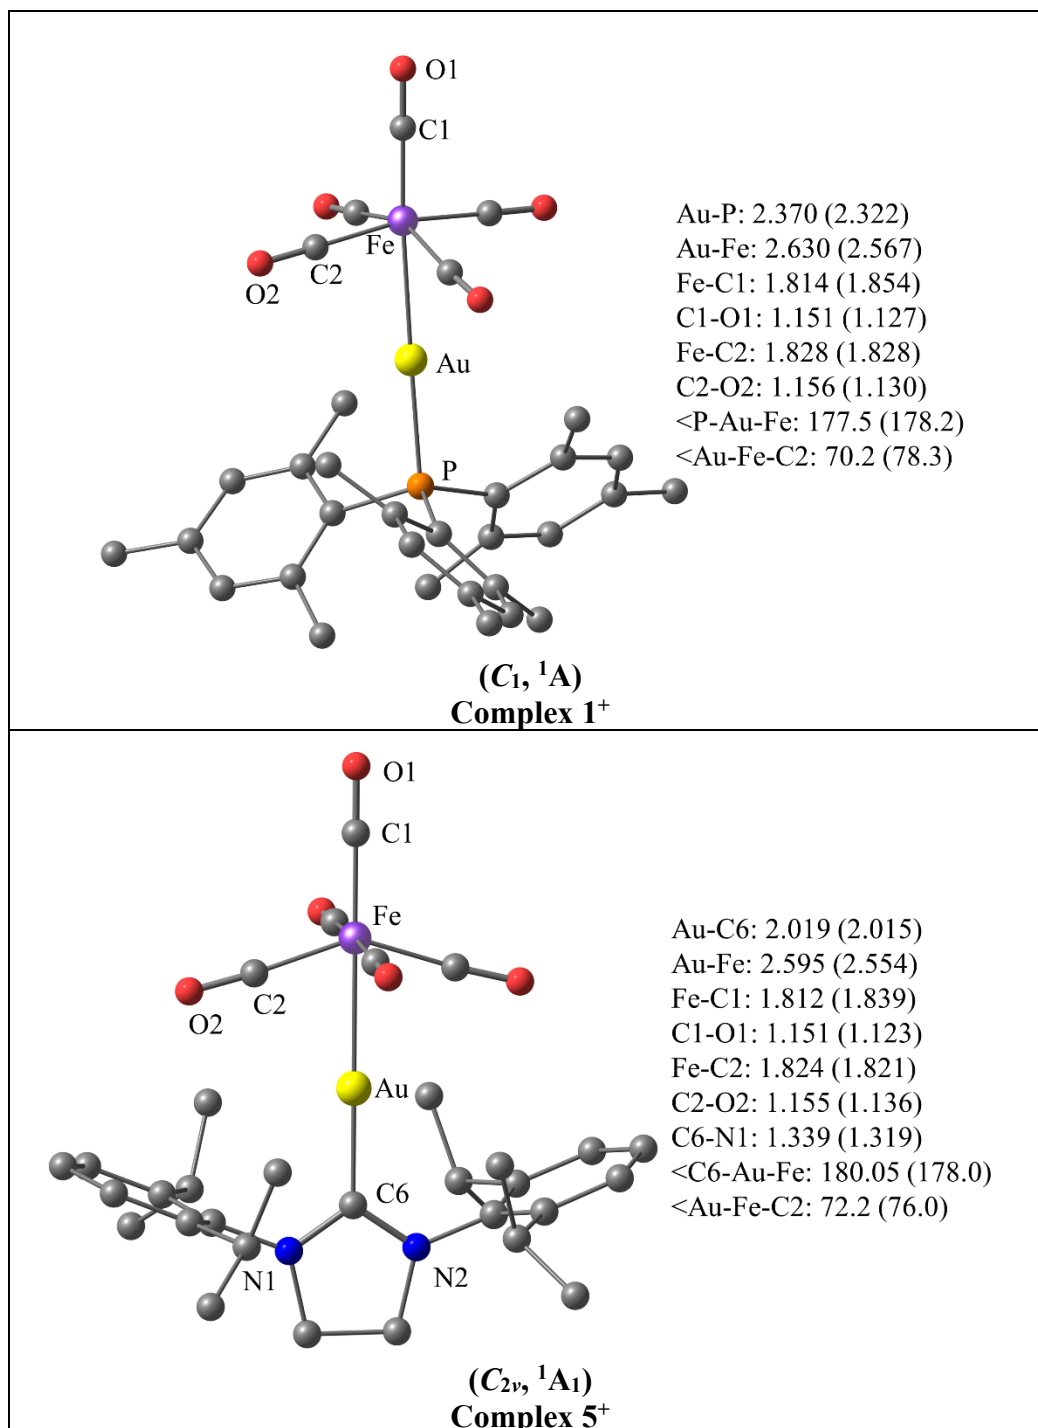

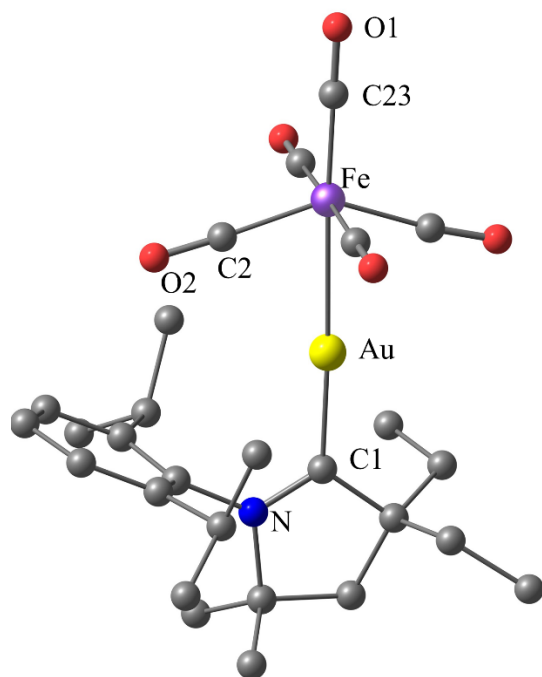

Au-C1: 2.022 (2.021)  
 Au-Fe: 2.630 (2.570)  
 Fe-C23: 1.812 (1.859)  
 C23-O1: 1.151 (1.123)  
 Fe-C2: 1.822 (1.831)  
 C2-O2: 1.154 (1.130)  
 C1-N: 1.310 (1.292)  
 $\angle$ C1-Au-Fe: 177.5 (177.9)  
 $\angle$ Au-Fe-C2: 74.6 (76.4)

**(C<sub>1</sub>, <sup>1</sup>A)**  
**Complex 6<sup>+</sup>**

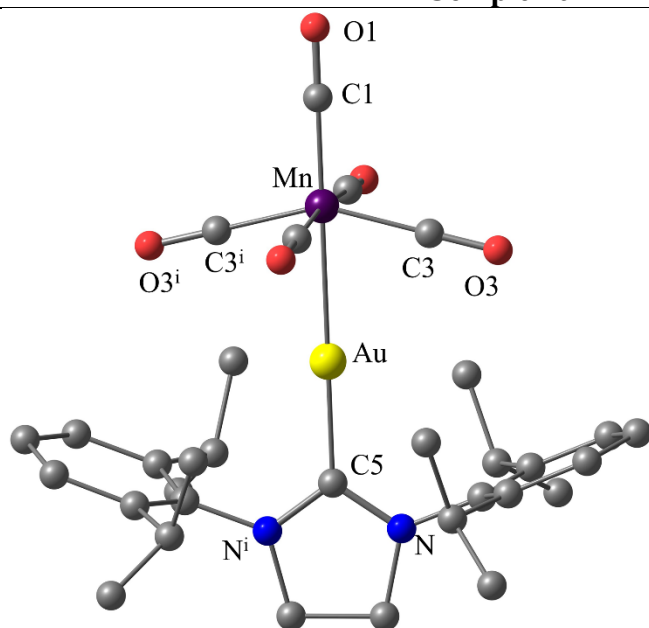

Au-C5: 2.027 (2.024)  
 Au-Mn: 2.587 (2.575)  
 Mn-C1: 1.806 (1.805)  
 C1-O1: 1.166 (1.147)  
 Mn-C3: 1.830 (1.835)  
 C3-O3: 1.167 (1.138)  
 C5-N: 1.346 (1.328)  
 $\angle$ C5-Au-Mn: 180.0 (177.9)  
 $\angle$ Au-Mn-C3: 76.4 (83.8)

**(C<sub>2</sub>, <sup>1</sup>A)**  
**Complex 7**

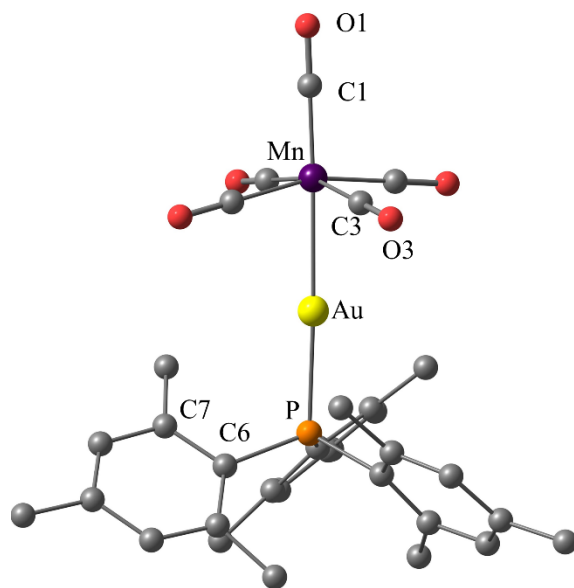

Au-P: 2.386 (2.324)  
 Au-Mn: 2.597 (2.575)  
 Mn-C1: 1.803 (1.822)  
 C1-O1: 1.165 (1.146)  
 Mn-C3: 1.835 (1.844)  
 C3-O3: 1.164 (1.145)  
 C6-P: 1.846 (1.833)  
 C6-C7: 1.432 (1.416)  
 $\angle$ P-Au-Mn: 178.0 (174.5)  
 $\angle$ Au-Mn-C3: 80.1 (74.8)

**(C<sub>1</sub>, <sup>1</sup>A)**  
**Complex 8**

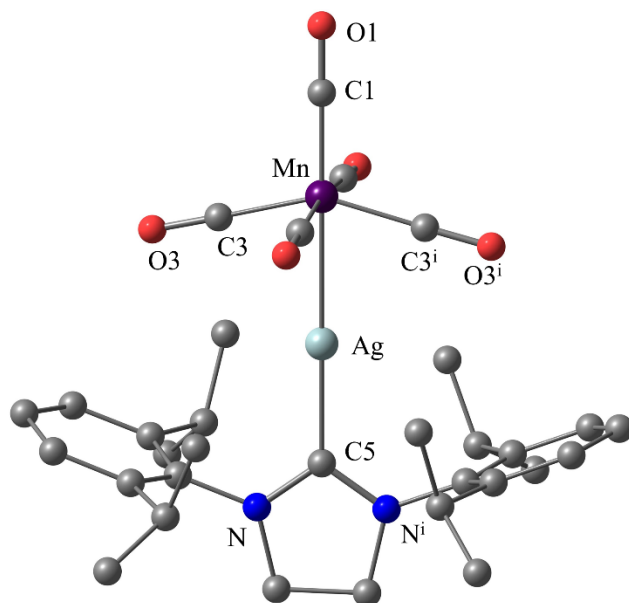

Ag-C5: 2.080 (2.113)  
 Ag-Mn: 2.561 (2.591)  
 Mn-C1: 1.804 (1.803)  
 C1-O1: 1.166 (1.144)  
 Mn-C3: 1.828 (1.832)  
 C3-O3: 1.169 (1.141)  
 C5-N: 1.344 (1.331)  
 $\angle$ C5-Ag-Mn: 180.0 (179.1)  
 $\angle$ Ag-Mn-C3: 75.7 (84.7)

**(C<sub>2</sub>, <sup>1</sup>A)**  
**Complex 9**

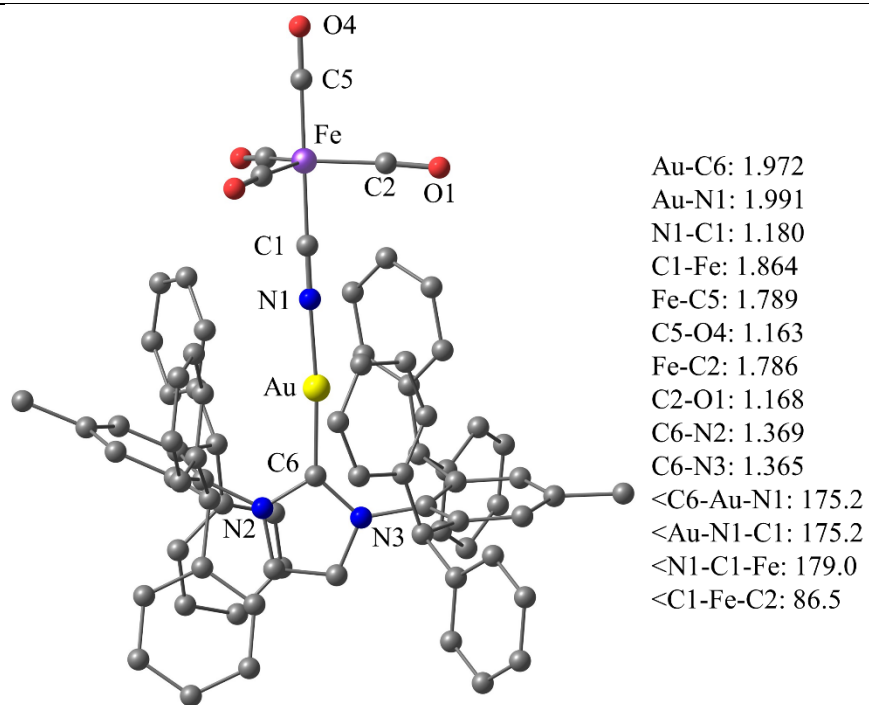

( $C_1$ ,  $^1A$ )

Complex 10;  $E_{rel}$ : 0.0 kcal/mol

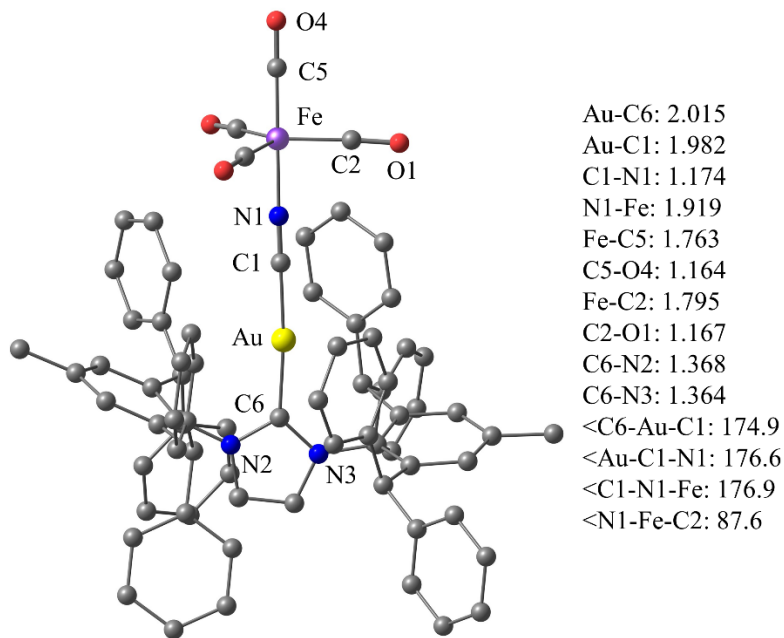

( $C_1$ ,  $^1A$ )

Complex 10';  $E_{rel}$ : 5.9 kcal/mol

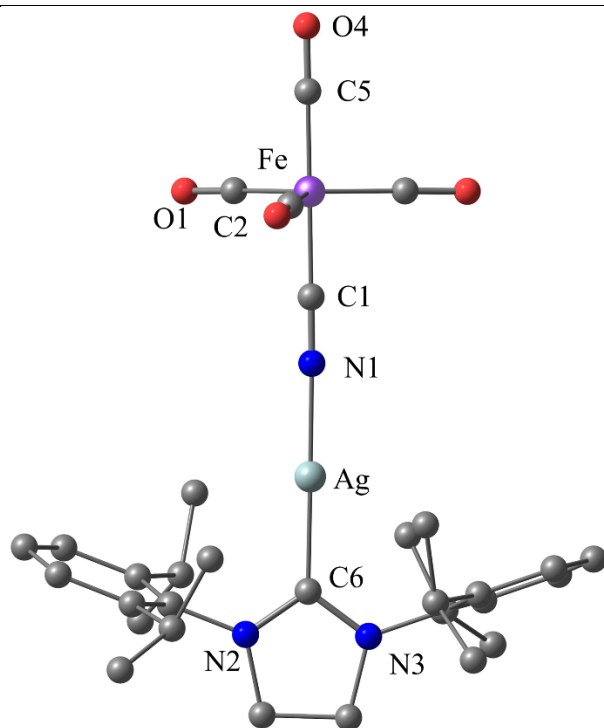

Ag-C6: 2.038  
 Ag-N1: 2.014  
 N1-C1: 1.183  
 C1-Fe: 1.872  
 Fe-C5: 1.785  
 C5-O4: 1.164  
 Fe-C2: 1.789  
 C2-O1: 1.167  
 C6-N2: 1.347  
 C6-N3: 1.347  
 <C6-Ag-N1: 179.7  
 <Ag-N1-C1: 178.4  
 <N1-C1-Fe: 179.7  
 <C1-Fe-C2: 87.6

(C<sub>1</sub>, <sup>1</sup>A)

Complex 11;  $E_{rel}$ : 0.0 kcal/mol

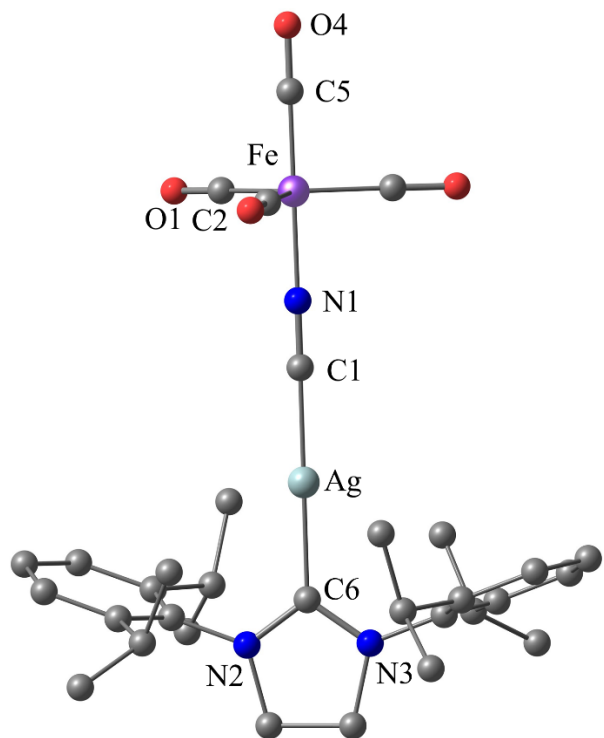

Ag-C6: 2.066  
 Ag-C1: 2.023  
 C1-N1: 1.176  
 N1-Fe: 1.928  
 Fe-C5: 1.759  
 C5-O4: 1.166  
 Fe-C2: 1.798  
 C2-O1: 1.166  
 C6-N2: 1.346  
 C6-N3: 1.346  
 <C6-Ag-C1: 179.8  
 <Ag-C1-N1: 179.7  
 <C1-N1-Fe: 179.9  
 <N1-Fe-C2: 88.7

$E_{rel}$ : 9.5 kcal/mol



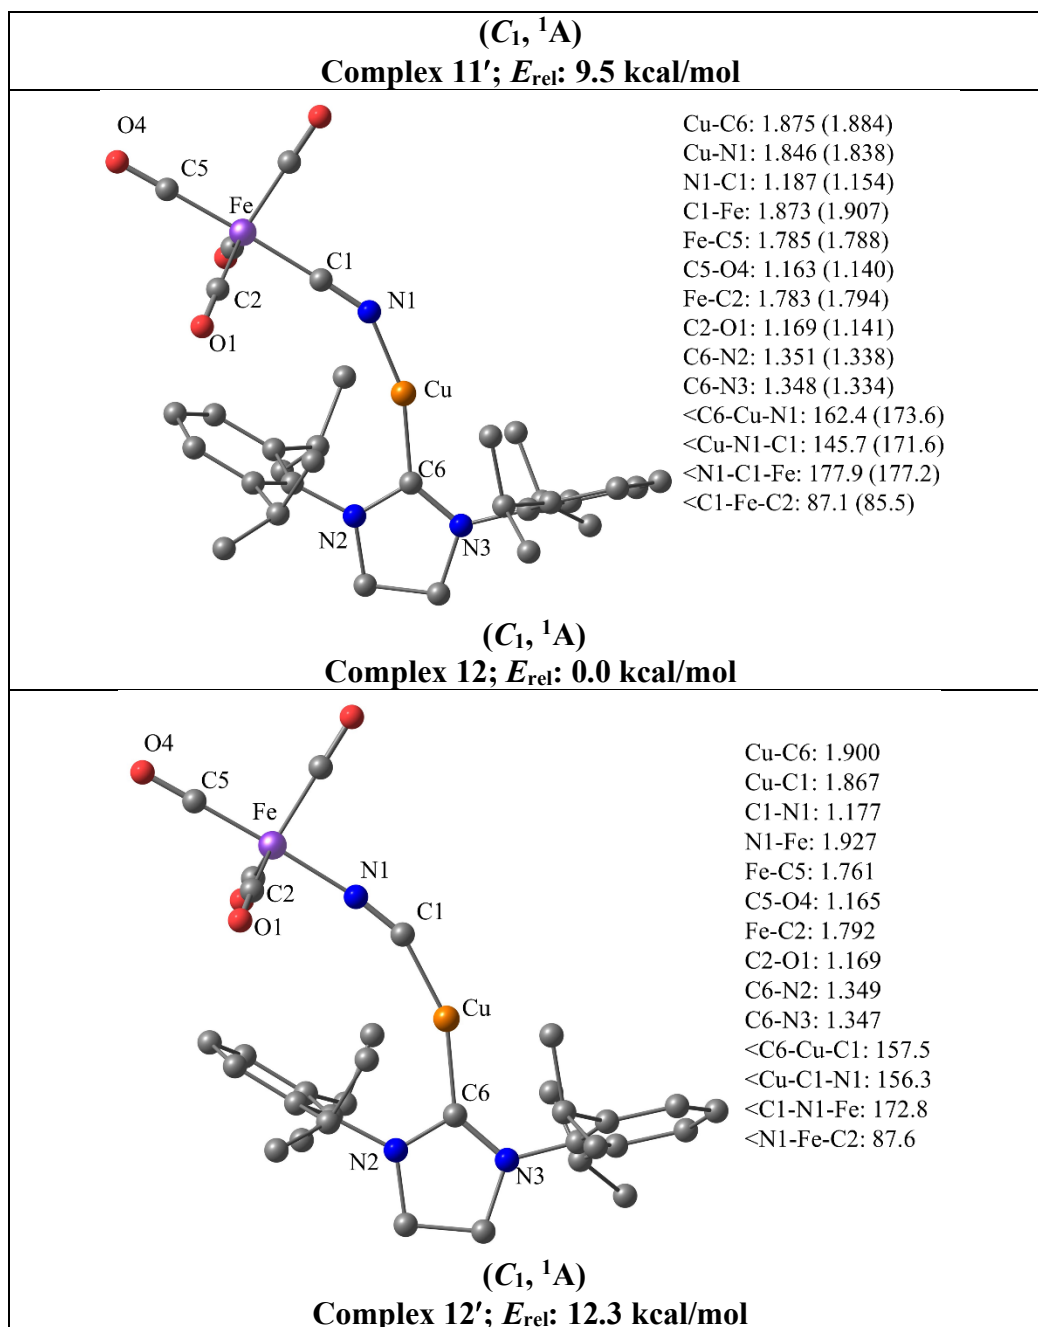

**Figure S1.** Optimized geometries of the studied complexes at the BP86-D3(BJ)/def2-SVP level. Bond lengths are given in Å, angles in degree. Experimental values are shown in parentheses.

| $\Delta\rho$                                                                                                                                                               | [Mes <sub>3</sub> P]                                                                                                       | Au <sup>+</sup> (d <sup>10</sup> , s <sup>0</sup> )                                                                           | [Fe(CO) <sub>5</sub> ]                                                                                                       |
|----------------------------------------------------------------------------------------------------------------------------------------------------------------------------|----------------------------------------------------------------------------------------------------------------------------|-------------------------------------------------------------------------------------------------------------------------------|------------------------------------------------------------------------------------------------------------------------------|
| 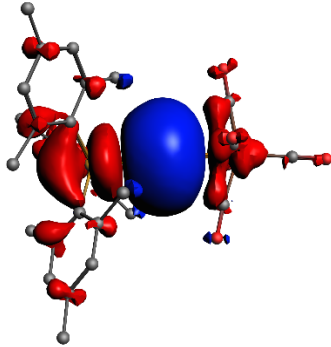 <p><math>\Delta\rho_{(1)}</math><br/><math>\Delta E_{\text{orb}(1)} = -93.3</math></p>   |  <p>HOMO (<math>v_1 = -0.56</math>)</p>   |  <p>LUMO (<math>v_1 = 1.15</math>)</p>     |  <p>HOMO (<math>v_1 = -0.30</math>)</p>   |
|  <p><math>\Delta\rho_{(2)}</math><br/><math>\Delta E_{\text{orb}(2)} = -18.2</math></p> |  <p>HOMO (<math>v_2 = -0.14</math>)</p> |  <p>LUMO+1 (<math>v_2 = 0.20</math>)</p> |  <p>HOMO (<math>v_2 = -0.08</math>)</p> |

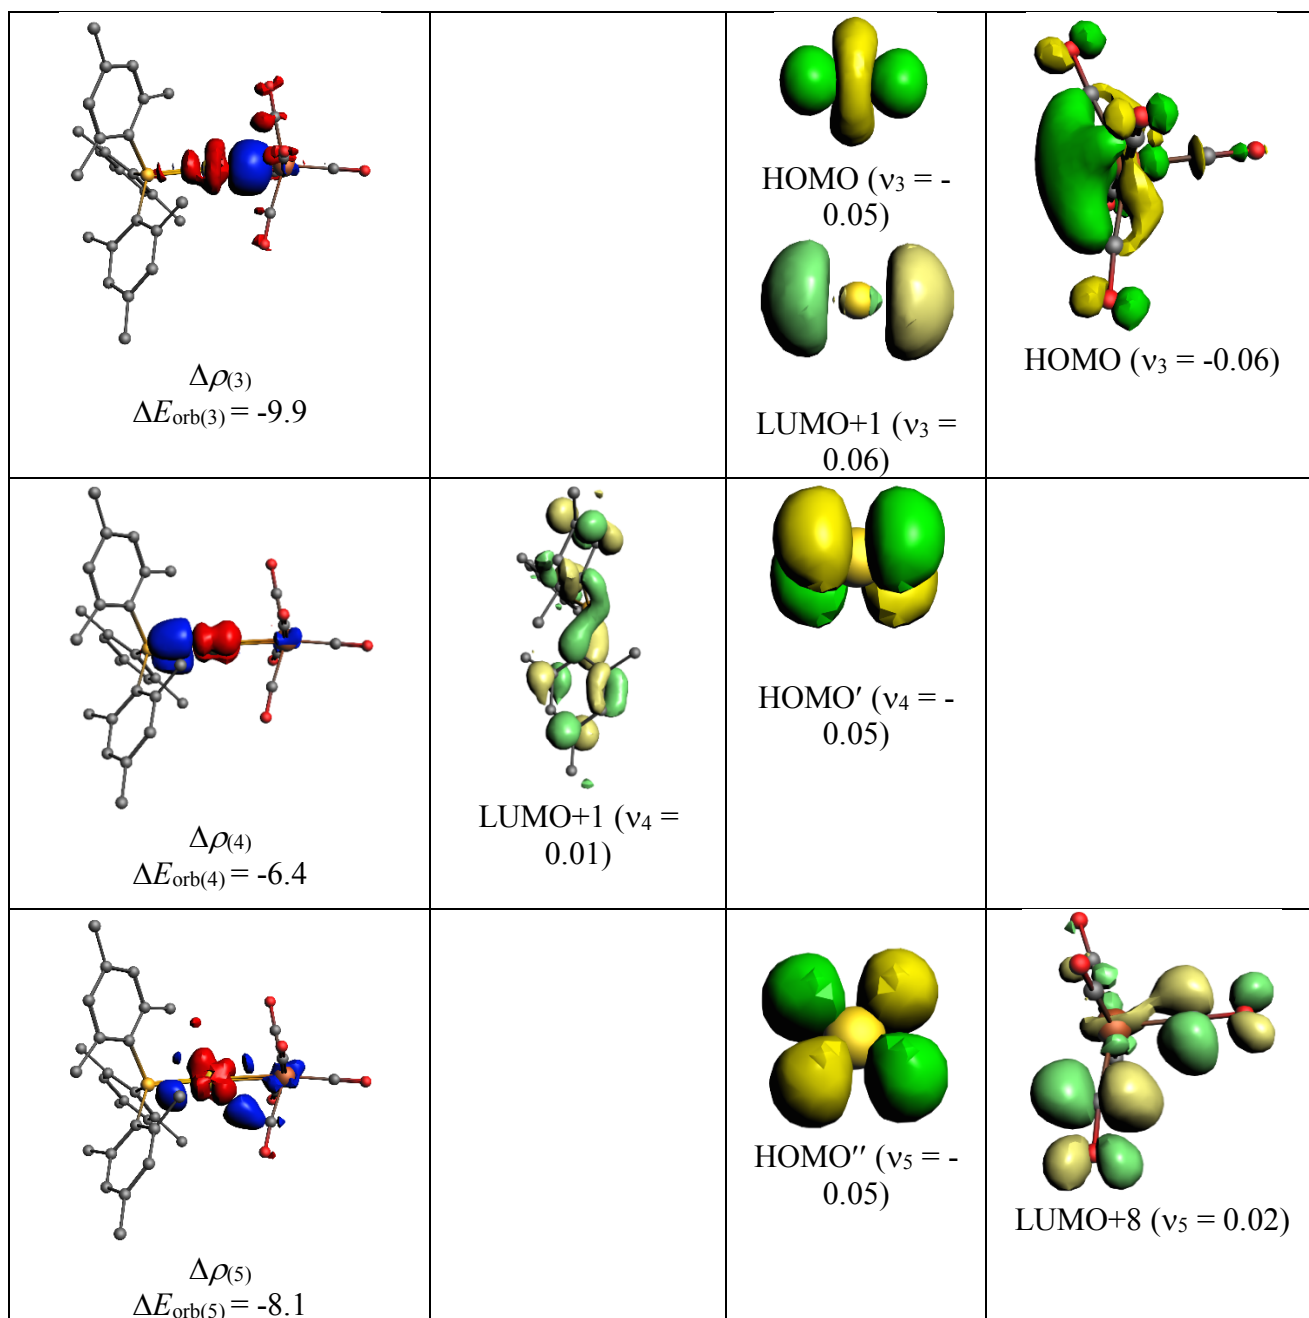

**Figure S2.** The shape of the deformation densities,  $\Delta\rho_{(1)-(5)}$  which are associated with  $\Delta E_{\text{orb}(1)-(5)}$ , and the associated fragment orbitals for complex  $1^+$  at the BP86-D3(BJ)/TZ2P-ZORA//BP86-D3(BJ)/def2-SVP level. The isovalue is 0.0008 au. The eigenvalues  $|v_n|$  give the size of the charge migration in e. The direction of the charge flow of the deformation densities is red→blue. Only the most important orbitals are shown.

| $\Delta\rho$ | [Et <sub>2</sub> CAAC] | Au <sup>+</sup> (d <sup>10</sup> , s <sup>0</sup> ) | [Fe(CO) <sub>5</sub> ] |
|--------------|------------------------|-----------------------------------------------------|------------------------|
|--------------|------------------------|-----------------------------------------------------|------------------------|

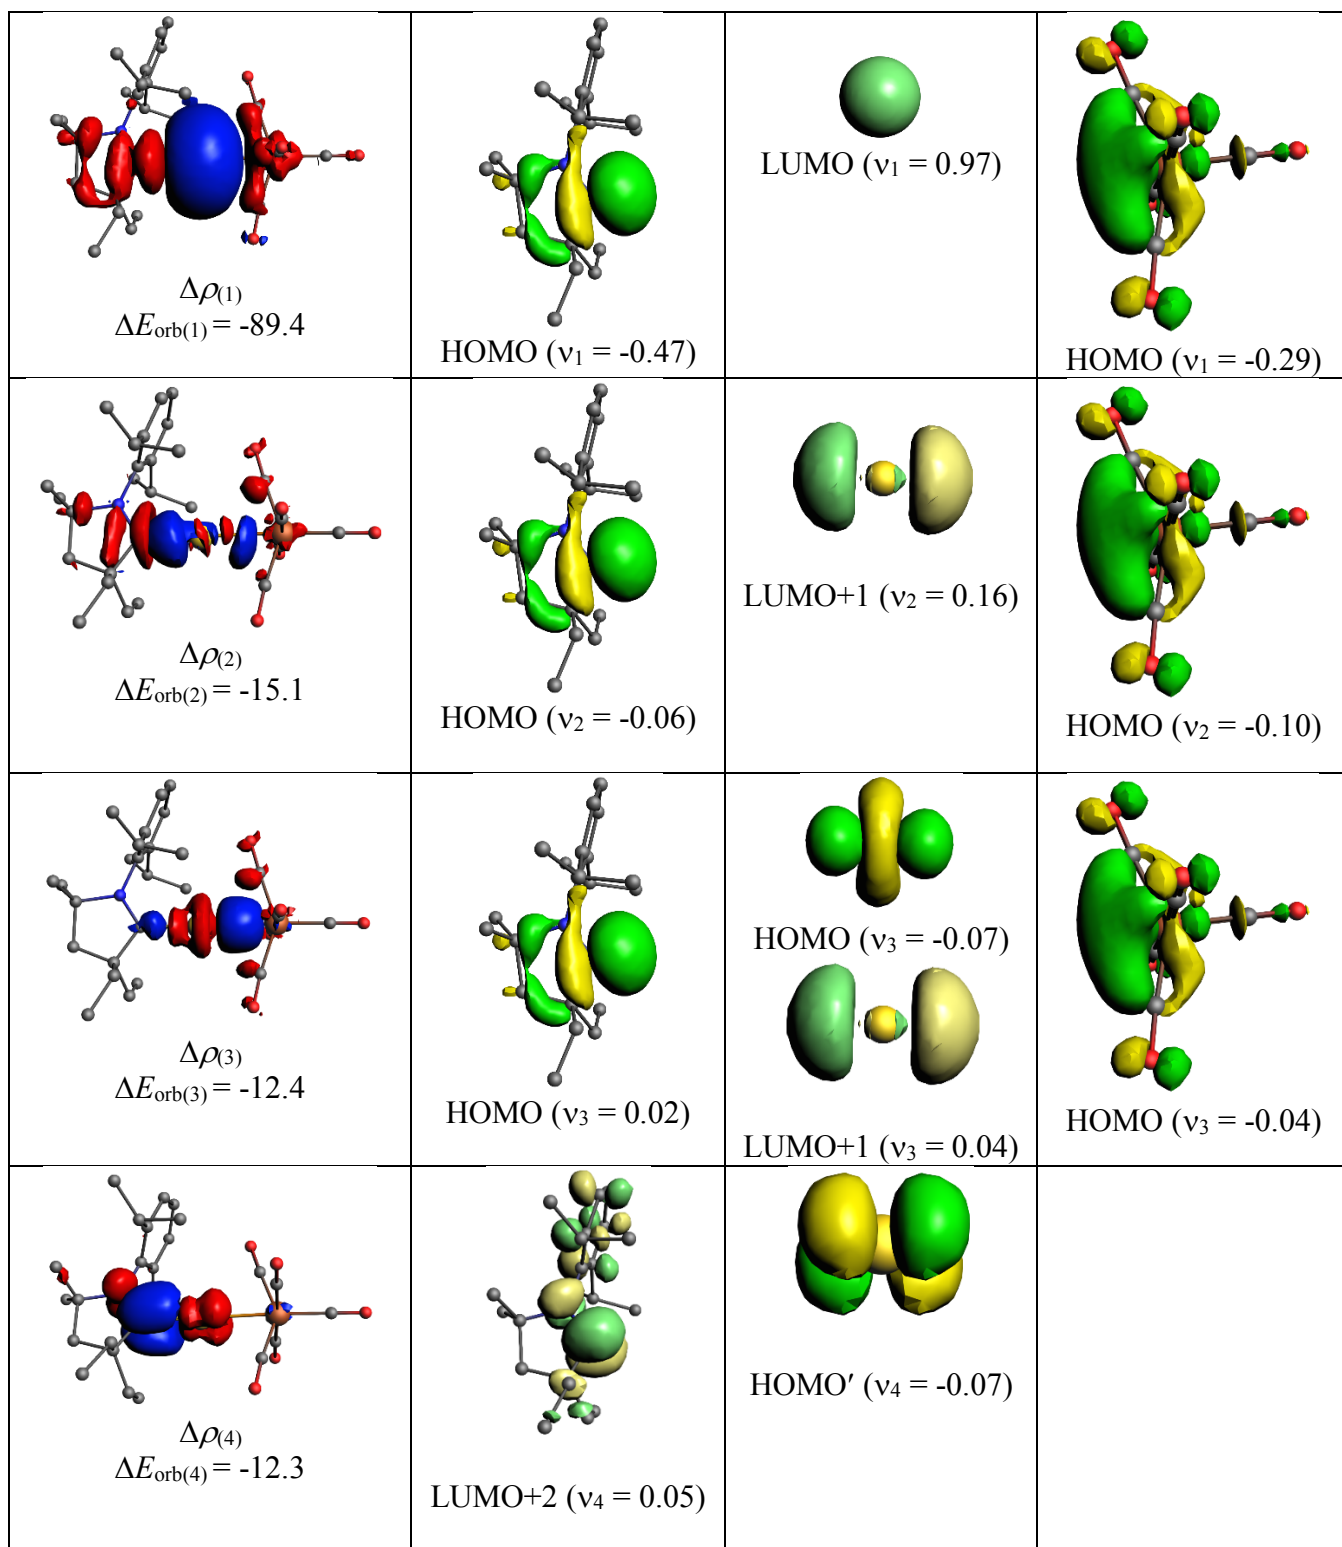

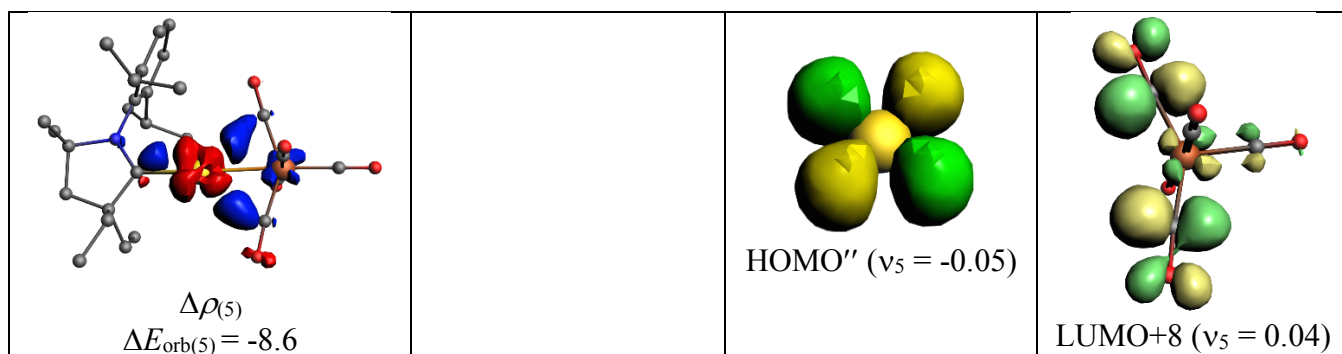

**Figure S3.** The shape of the deformation densities,  $\Delta\rho_{(1)-(5)}$  which are associated with  $\Delta E_{\text{orb}(1)-(5)}$ , and the associated fragment orbitals for complex  $6^+$  at the BP86-D3(BJ)/TZ2P-ZORA//BP86-D3(BJ)/def2-SVP level. The isovalue is 0.0008 au. The eigenvalues  $v$  of the fragment orbitals give the size of the charge migration. The direction of the charge flow of the deformation densities is red→blue. Only the most important orbitals are shown.

| $\Delta\rho$                                                                                                                                                               | [SIPr]                                                                                                                     | $\text{Au}^+ (\text{d}^{10}, \text{s}^0)$                                                                                                                        | $[\text{Mn}(\text{CO})_5]^-$                                                                                                 |
|----------------------------------------------------------------------------------------------------------------------------------------------------------------------------|----------------------------------------------------------------------------------------------------------------------------|------------------------------------------------------------------------------------------------------------------------------------------------------------------|------------------------------------------------------------------------------------------------------------------------------|
| 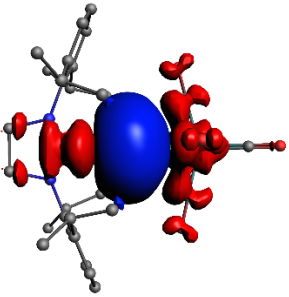 <p><math>\Delta\rho_{(1)}</math><br/><math>\Delta E_{\text{orb}(1)} = -88.1</math></p>   |  <p>HOMO (<math>v_1 = -0.32</math>)</p>   |  <p>LUMO (<math>v_1 = 1.02</math>)</p>                                         |  <p>HOMO (<math>v_1 = -0.49</math>)</p>   |
|  <p><math>\Delta\rho_{(2)}</math><br/><math>\Delta E_{\text{orb}(2)} = -14.3</math></p>  |  <p>HOMO (<math>v_2 = -0.06</math>)</p>  |  <p>LUMO+1 (<math>v_2 = 0.09</math>)</p>                                      |  <p>HOMO (<math>v_2 = -0.01</math>)</p>  |
|  <p><math>\Delta\rho_{(3)}</math><br/><math>\Delta E_{\text{orb}(3)} = -15.3</math></p> |  <p>HOMO (<math>v_3 = -0.06</math>)</p> |  <p>LUMO+1 (<math>v_3 = 0.17</math>)<br/>HOMO (<math>v_3 = -0.05</math>)</p> |  <p>HOMO (<math>v_3 = -0.09</math>)</p> |

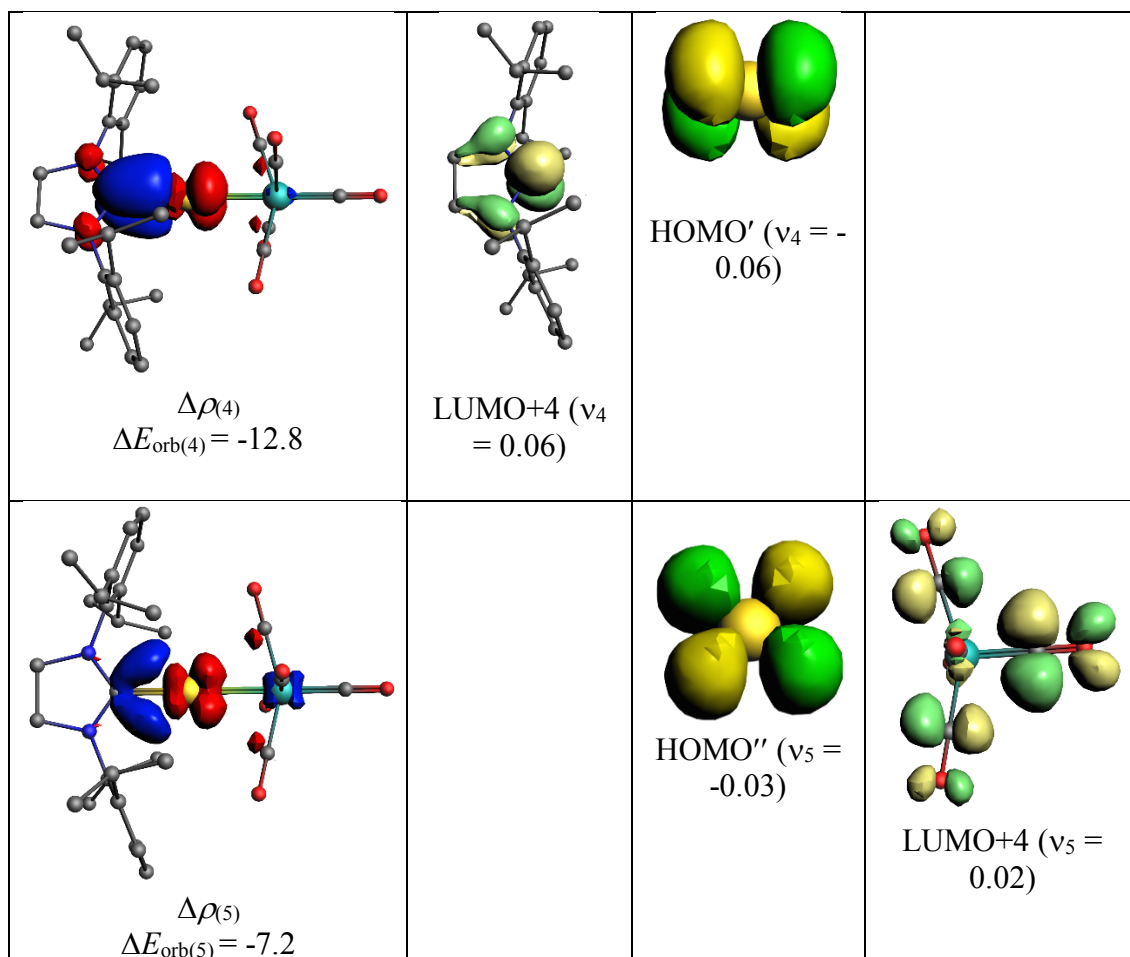

**Figure S4.** The shape of the deformation densities,  $\Delta\rho_{(1)-(5)}$  which are associated with  $\Delta E_{\text{orb}(1)-(5)}$ , and the associated fragment orbitals for complex **7** at the BP86-D3(BJ)/TZ2P-ZORA//BP86-D3(BJ)/def2-SVP level. The isovalue is 0.0008 au. The eigenvalues  $v$  of the fragment orbitals give the size of the charge migration. The direction of the charge flow of the deformation densities is red→blue. Only the most important orbitals are shown.

| $\Delta\rho$                                                                                                                                                               | [Mes <sub>3</sub> P]                                                                                                       | Au <sup>+</sup> (d <sup>10</sup> , s <sup>0</sup> )                                                                                                                                                                                                      | [Mn(CO) <sub>5</sub> ] <sup>-</sup>                                                                                          |
|----------------------------------------------------------------------------------------------------------------------------------------------------------------------------|----------------------------------------------------------------------------------------------------------------------------|----------------------------------------------------------------------------------------------------------------------------------------------------------------------------------------------------------------------------------------------------------|------------------------------------------------------------------------------------------------------------------------------|
| 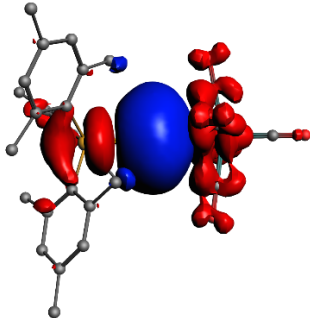 <p><math>\Delta\rho_{(1)}</math><br/><math>\Delta E_{\text{orb}(1)} = -90.6</math></p>   |  <p>HOMO (<math>v_1 = -0.30</math>)</p>   |  <p>LUMO (<math>v_1 = 1.12</math>)</p>                                                                                                                                 |  <p>HOMO (<math>v_1 = -0.56</math>)</p>   |
|  <p><math>\Delta\rho_{(2)}</math><br/><math>\Delta E_{\text{orb}(2)} = -16.4</math></p>  |  <p>HOMO (<math>v_2 = -0.15</math>)</p>  |  <p>LUMO+1 (<math>v_2 = 0.16</math>)</p>                                                                                                                               |  <p>HOMO (<math>v_2 = -0.03</math>)</p>  |
|  <p><math>\Delta\rho_{(3)}</math><br/><math>\Delta E_{\text{orb}(3)} = -11.0</math></p> |  <p>HOMO (<math>v_3 = -0.02</math>)</p> |  <p>LUMO+1 (<math>v_3 = 0.08</math>)</p>  <p>HOMO (<math>v_3 = -0.05</math>)</p> |  <p>HOMO (<math>v_3 = -0.06</math>)</p> |



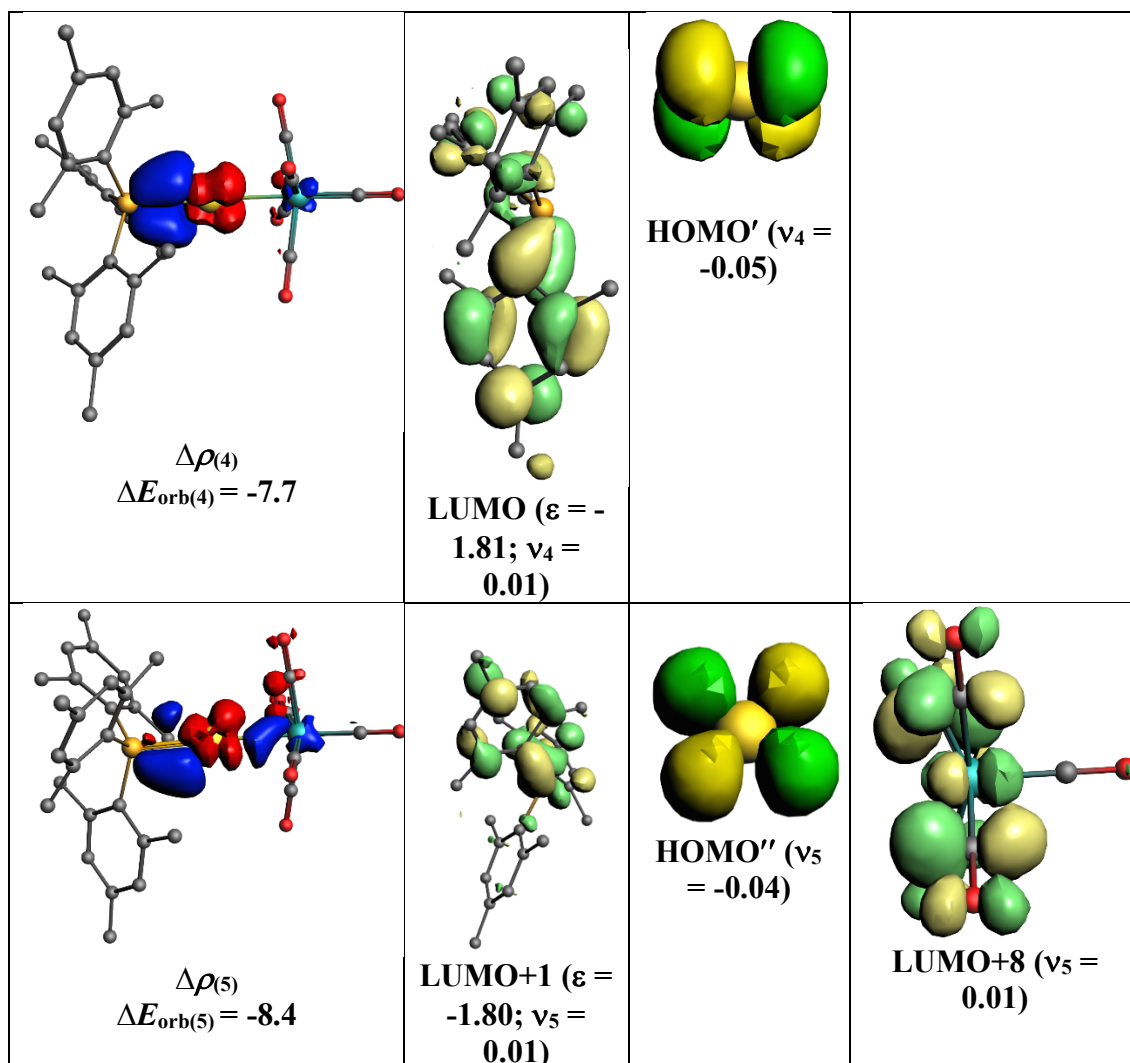

**Figure S5.** The shape of the deformation densities,  $\Delta\rho_{(1)-(5)}$  which are associated with  $\Delta E_{\text{orb}(1)-(5)}$ , and the associated fragment orbitals for complex **8** at the BP86-D3(BJ)/TZ2P-ZORA//BP86-D3(BJ)/def2-SVP level. The isovalue is 0.0008 au. The eigenvalues  $\nu$  of the fragment orbitals give the size of the charge migration. The direction of the charge flow of the deformation densities is red→blue. Only the most important orbitals are shown.

| $\Delta\rho$                                                                                                                                                              | [SIPr]                                                                                                                     | $\text{Ag}^+$ ( $d^{10}, s^0$ )                                                                                                                                                                                                                          | $[\text{Mn}(\text{CO})_5]^-$                                                                                                |
|---------------------------------------------------------------------------------------------------------------------------------------------------------------------------|----------------------------------------------------------------------------------------------------------------------------|----------------------------------------------------------------------------------------------------------------------------------------------------------------------------------------------------------------------------------------------------------|-----------------------------------------------------------------------------------------------------------------------------|
| 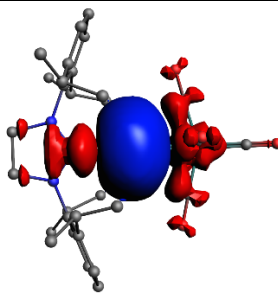 <p><math>\Delta\rho_{(1)}</math><br/><math>\Delta E_{\text{orb}(1)} = -46.8</math></p>  |  <p>HOMO (<math>v_1 = -0.18</math>)</p>   |  <p>LUMO (<math>v_1 = 0.65</math>)</p>                                                                                                                                 |  <p>HOMO (<math>v_1 = -0.35</math>)</p>  |
|  <p><math>\Delta\rho_{(2)}</math><br/><math>\Delta E_{\text{orb}(2)} = -12.7</math></p> |  <p>HOMO (<math>v_2 = -0.13</math>)</p>  |  <p>LUMO+1 (<math>v_2 = 0.22</math>)</p>                                                                                                                               |  <p>HOMO (<math>v_2 = -0.09</math>)</p> |
|  <p><math>\Delta\rho_{(3)}</math><br/><math>\Delta E_{\text{orb}(3)} = -9.5</math></p> |  <p>HOMO (<math>v_3 = -0.10</math>)</p> |  <p>LUMO+1 (<math>v_3 = 0.04</math>)</p>  <p>HOMO (<math>v_1 = -0.02</math>)</p> |                                                                                                                             |

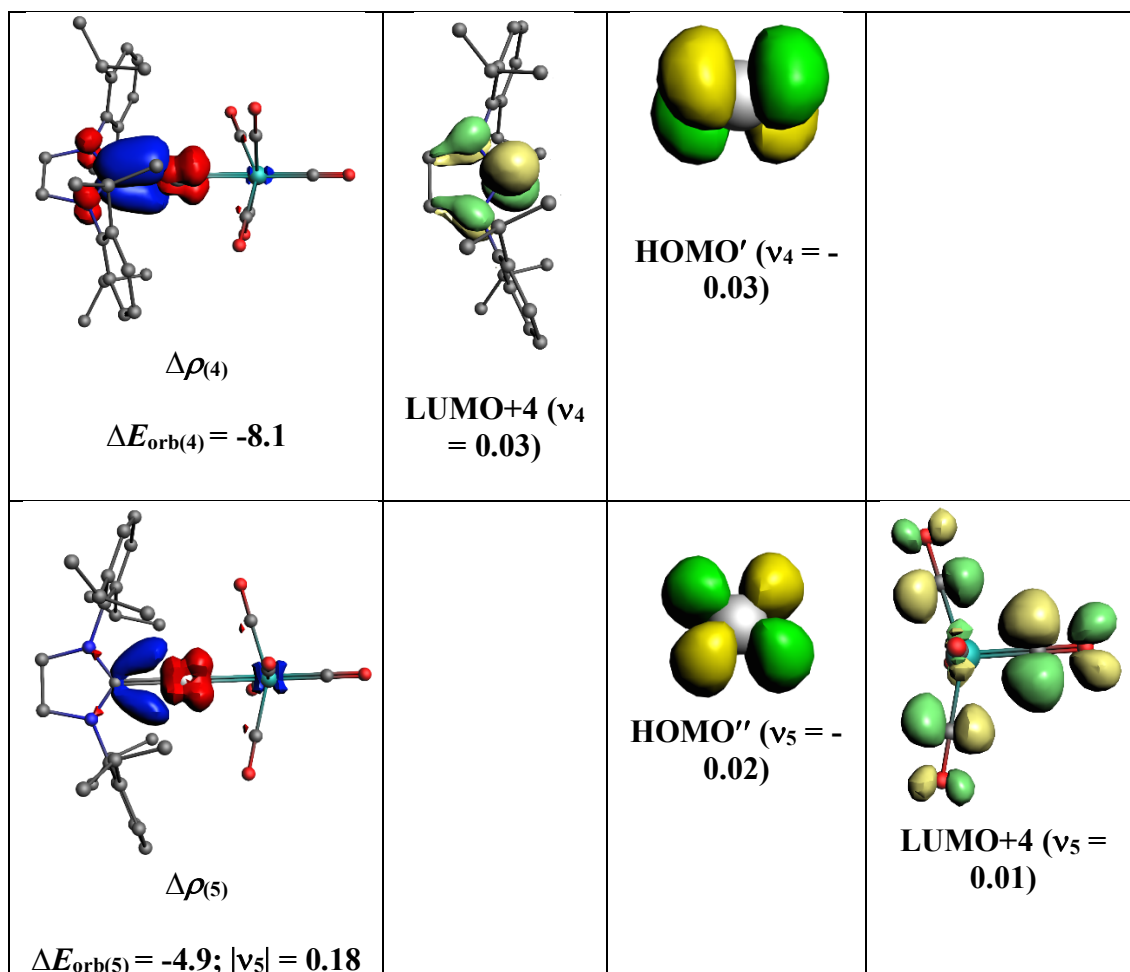

**Figure S6.** The shape of the deformation densities,  $\Delta\rho_{(1)-(5)}$  which are associated with  $\Delta E_{\text{orb}(1)-(5)}$ , and the associated fragment orbitals for complex **9** at the BP86-D3(BJ)/TZ2P-ZORA//BP86-D3(BJ)/def2-SVP level. The isovalue is 0.0008 au. The eigenvalues  $v$  of the fragment orbitals give the size of the charge migration. The direction of the charge flow of the deformation densities is red→blue. Only the most important orbitals are shown.

| $\Delta\rho$                                                                                                                                                        | IPr                                                                                                                       | Au <sup>+</sup> (d <sup>10</sup> , s <sup>0</sup> )                                                                          | [Fe(CO) <sub>4</sub> ]CN <sup>-</sup>                                                                                          |
|---------------------------------------------------------------------------------------------------------------------------------------------------------------------|---------------------------------------------------------------------------------------------------------------------------|------------------------------------------------------------------------------------------------------------------------------|--------------------------------------------------------------------------------------------------------------------------------|
| 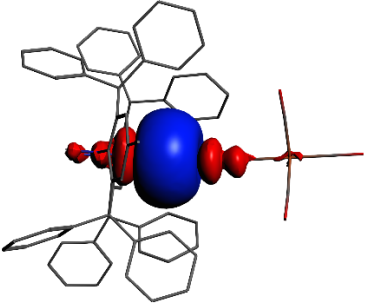 <p><math>\Delta\rho_{(1)}</math><br/><math>\Delta E_{orb(1)} = -94.9</math></p>   |  <p>HOMO (<math>v_1 = -0.38</math>)</p>  |  <p>LUMO (<math>v_1 = 0.99</math>)</p>     |  <p>HOMO-4 (<math>v_1 = -0.21</math>)</p>   |
|  <p><math>\Delta\rho_{(2)}</math><br/><math>\Delta E_{orb(2)} = -18.3</math></p>  |  <p>HOMO (<math>v_2 = -0.04</math>)</p> |  <p>LUMO+1 (<math>v_2 = 0.06</math>)</p>   |                                                                                                                                |
|  <p><math>\Delta\rho_{(3)}</math><br/><math>\Delta E_{orb(3)} = -10.9</math></p> |                                                                                                                           |  <p>LUMO+1 (<math>v_3 = 0.11</math>)</p> |  <p>HOMO-4 (<math>v_3 = -0.05</math>)</p> |

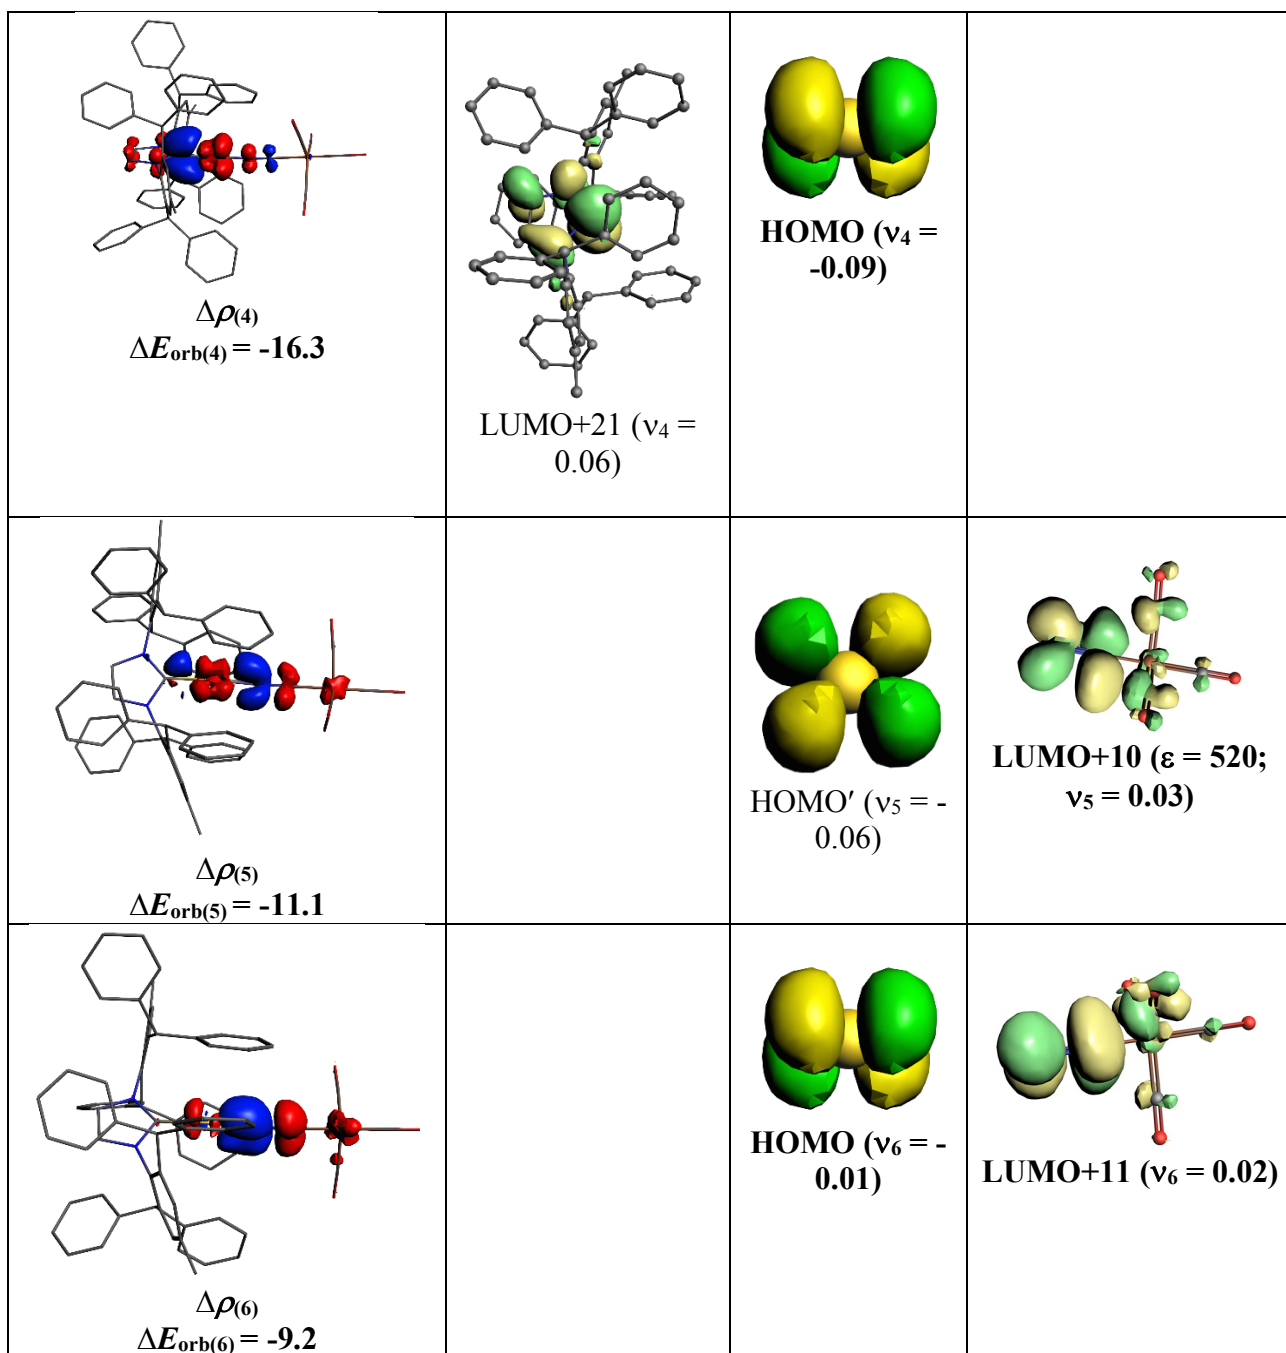

**Figure S7.** The shape of the deformation densities,  $\Delta\rho_{(1)-(6)}$  which are associated with  $\Delta E_{\text{orb}(1)-(6)}$ , and the associated fragment orbitals for complex **10** at the BP86-D3(BJ)/TZ2P-ZORA/BP86-D3(BJ)/def2-SVP level. The isovalue is 0.0008 au. The eigenvalues  $v$  of the fragment orbitals give the size of the charge migration. The direction of the charge flow of the deformation densities is red→blue.

| $\Delta\rho$                                                                                                                                                              | [SIPr]                                                                                                                   | $\text{Ag}^+ (d^{10}, s^0)$                                                                                                  | $[\text{Fe}(\text{CO})_4]\text{CN}^-$                                                                                          |
|---------------------------------------------------------------------------------------------------------------------------------------------------------------------------|--------------------------------------------------------------------------------------------------------------------------|------------------------------------------------------------------------------------------------------------------------------|--------------------------------------------------------------------------------------------------------------------------------|
| 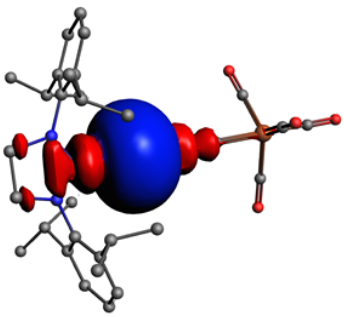 <p><math>\Delta\rho_{(1)}</math><br/><math>\Delta E_{\text{orb}(1)} = -49.6</math></p>  |  <p>HOMO (<math>v_1 = -0.25</math>)</p> |  <p>LUMO (<math>v_1 = 0.61</math>)</p>     |  <p>HOMO-4 (<math>v_1 = -0.14</math>)</p>   |
|  <p><math>\Delta\rho_{(2)}</math><br/><math>\Delta E_{\text{orb}(2)} = -12.8</math></p> |  <p>HOMO (<math>v_2 = -0.18</math>)</p> |  <p>LUMO+1 (<math>v_2 = 0.13</math>)</p>   |                                                                                                                                |
|  <p><math>\Delta\rho_{(3)}</math><br/><math>\Delta E_{\text{orb}(3)} = -9.1</math></p> |                                                                                                                          |  <p>LUMO+1 (<math>v_3 = 0.09</math>)</p> |  <p>HOMO-4 (<math>v_3 = -0.09</math>)</p> |

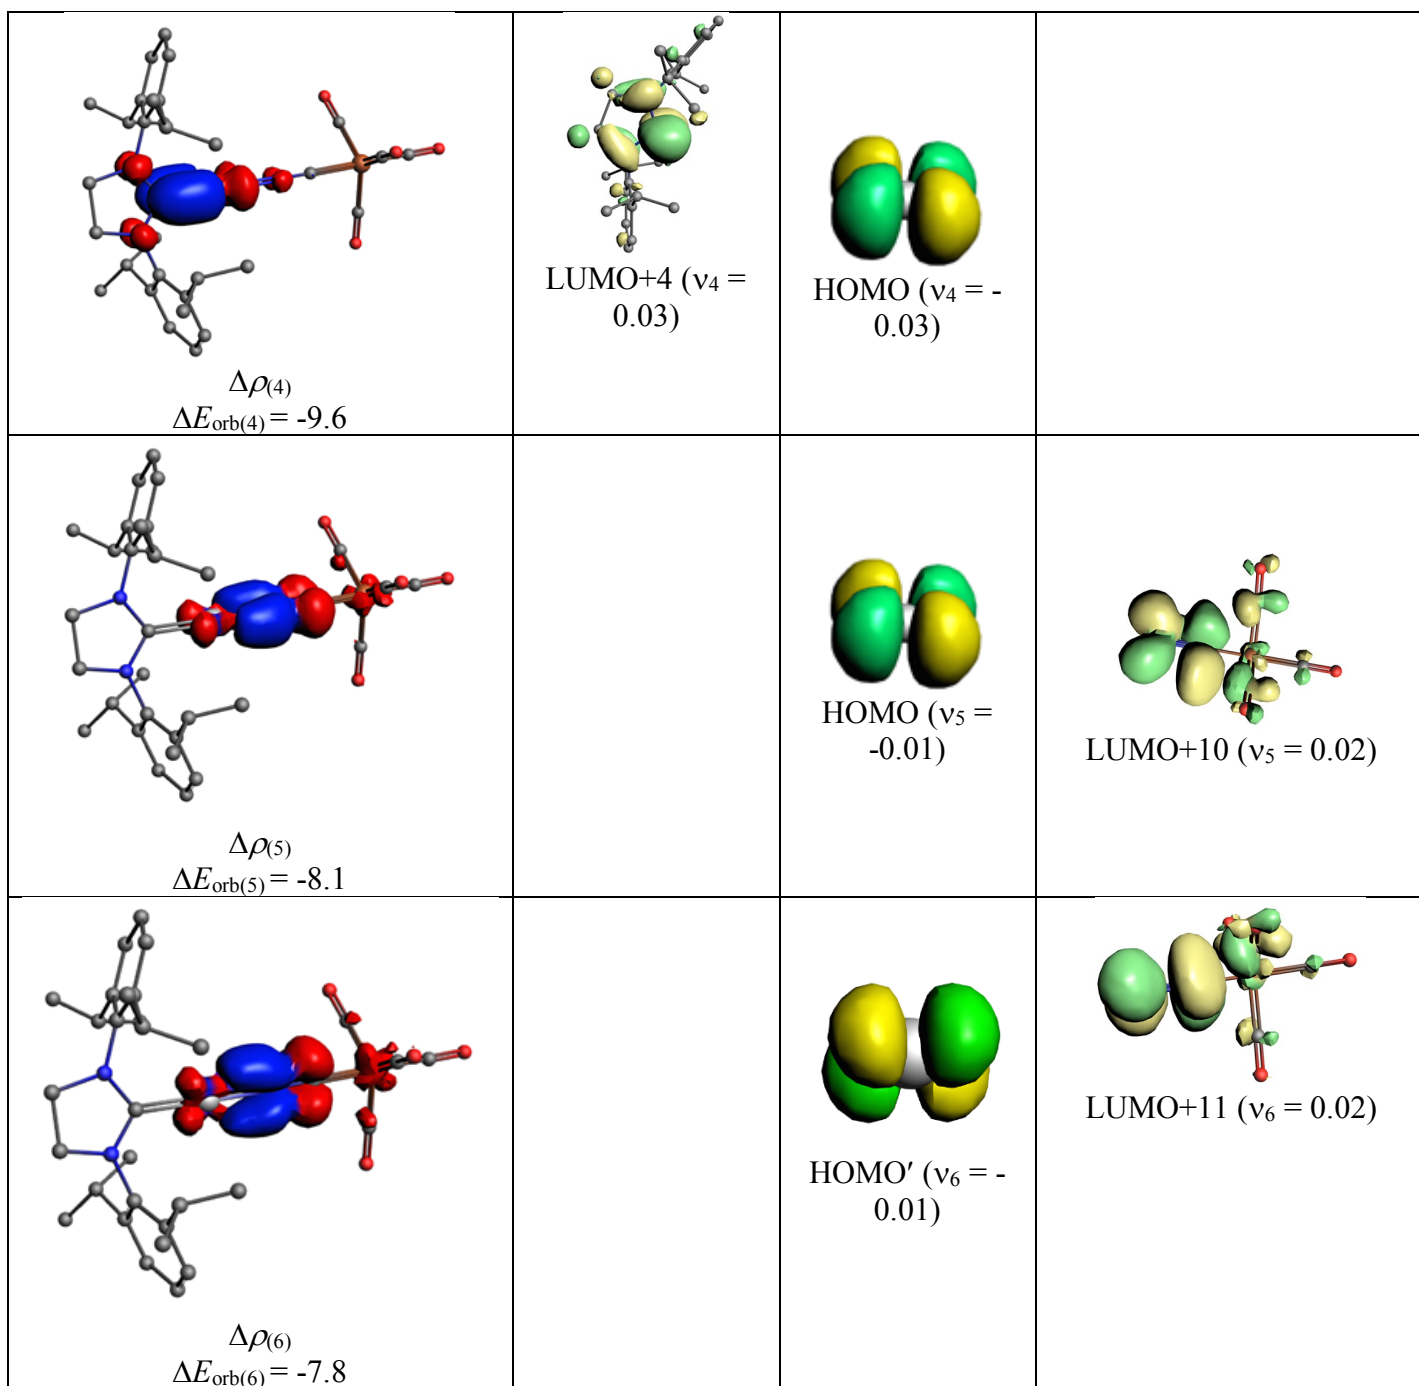

**Figure S8.** The shape of the deformation densities,  $\Delta\rho_{(1)-(6)}$  which are associated with  $\Delta E_{\text{orb}(1)-(6)}$ , and the associated fragment orbitals for complex **11** at the BP86-D3(BJ)/TZ2P-ZORA//BP86-D3(BJ)/def2-SVP level. The isovalue is 0.0008 au. The eigenvalues  $v$  of the fragment orbitals give the size of the charge migration. The direction of the charge flow of the deformation densities is red→blue.

| $\Delta\rho$                                                                                                                                                                             | [SIPr]                                                                                                                     | $\text{Cu}^+ (d^{10}, s^0)$                                                                                                                                                                                                                            | $[\text{Fe}(\text{CO})_4]\text{CN}^-$                                                                                          |
|------------------------------------------------------------------------------------------------------------------------------------------------------------------------------------------|----------------------------------------------------------------------------------------------------------------------------|--------------------------------------------------------------------------------------------------------------------------------------------------------------------------------------------------------------------------------------------------------|--------------------------------------------------------------------------------------------------------------------------------|
| 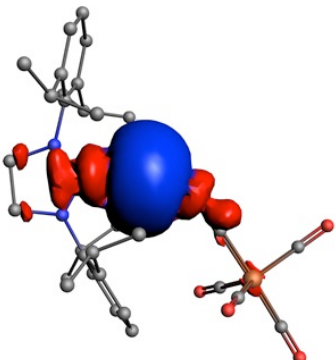 <p><math>\Delta\rho_{(1)}</math><br/><math>\Delta E_{\text{orb}(1)} = -48.9</math></p>                 |  <p>HOMO (<math>v_1 = -0.27</math>)</p>   |  <p>LUMO (<math>v_1 = 0.73</math>)</p>                                                                                                                               |  <p>HOMO-4 (<math>v_1 = -0.14</math>)</p>   |
|  <p><math>\Delta\rho_{(2)}</math><br/><math>\Delta E_{\text{orb}(2)} = -15.5</math></p>                |  <p>HOMO (<math>v_2 = -0.24</math>)</p>  |  <p>LUMO+3 (<math>v_2 = 0.24</math>)</p>                                                                                                                            |                                                                                                                                |
|  <p><math>\Delta\rho_{(2)}</math><br/><math>\Delta E_{\text{orb}(2)} = -16.9;  v_2  = 0.28</math></p> |  <p>HOMO (<math>v_3 = -0.03</math>)</p> |  <p>LUMO (<math>v_3 = 0.06</math>)</p>  <p>HOMO (<math>v_3 = -0.03</math>)</p> |  <p>HOMO-4 (<math>v_3 = -0.02</math>)</p> |



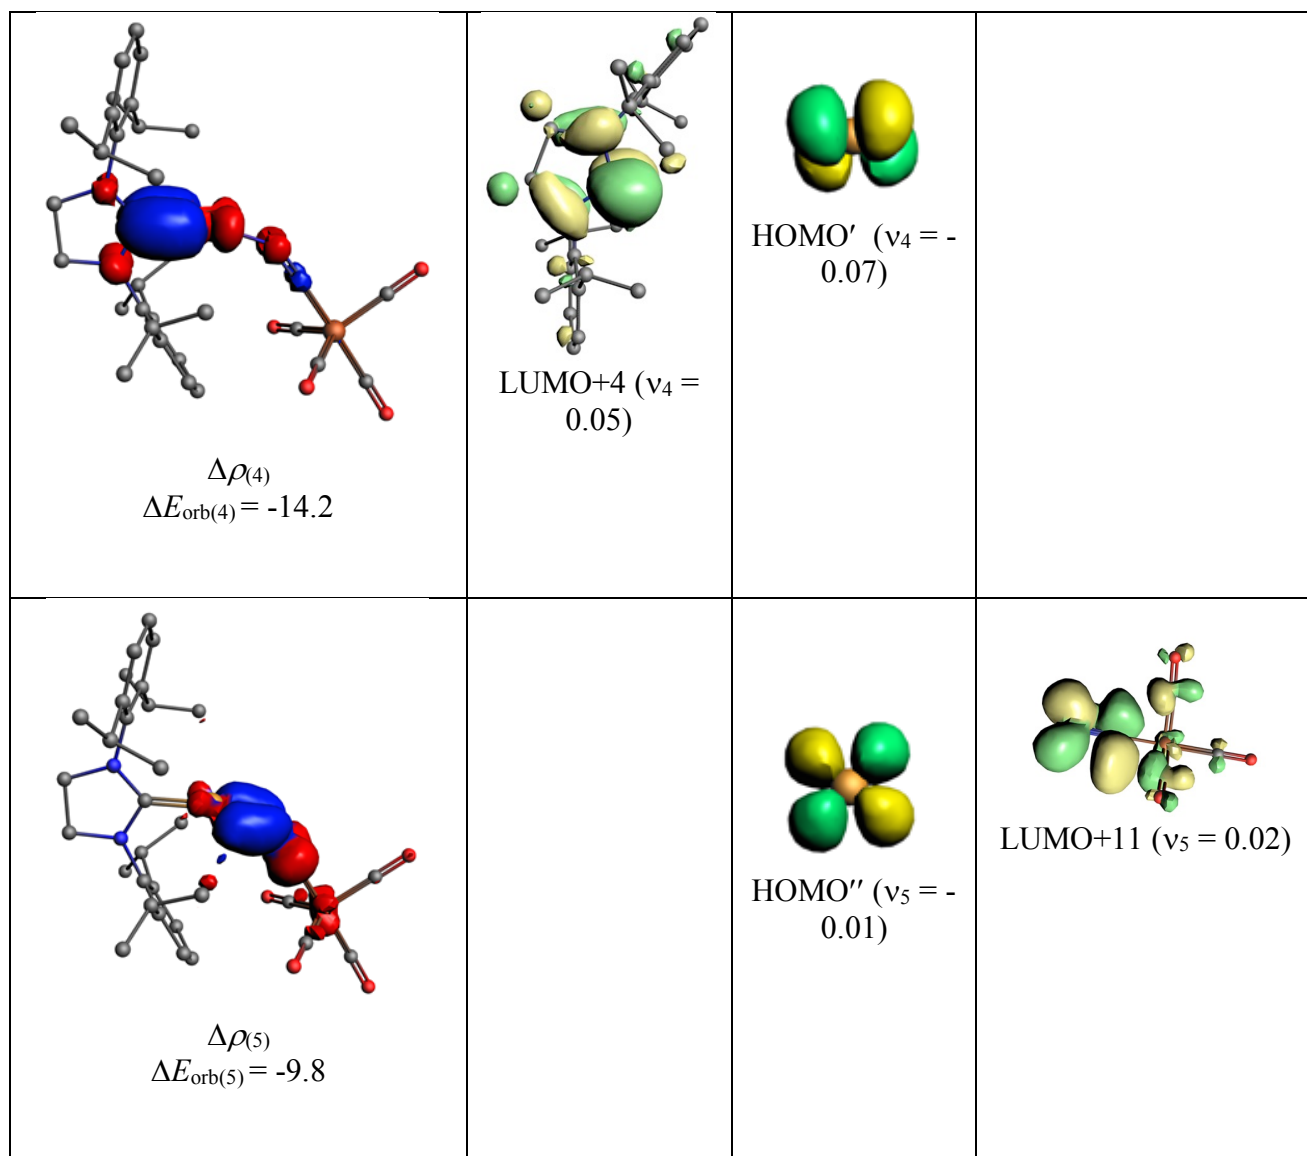

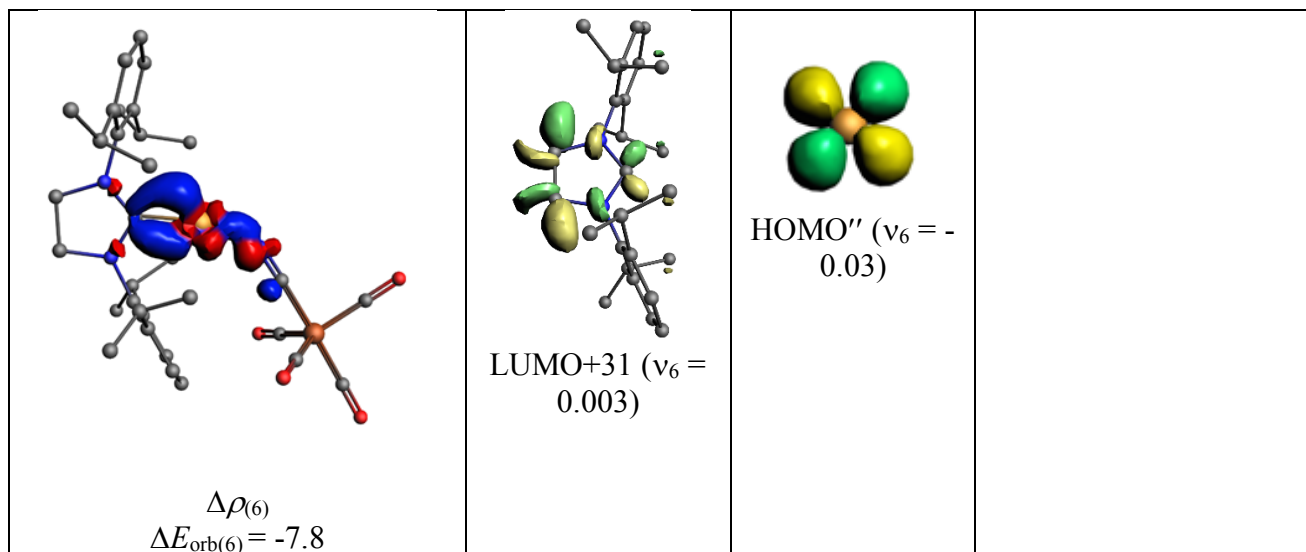

**Figure S9.** The shape of the deformation densities,  $\Delta\rho_{(1)-(6)}$  which are associated with  $\Delta E_{\text{orb}(1)-(6)}$ , and the associated fragment orbitals for complex **12** at the BP86-D3(BJ)/TZ2P-ZORA//BP86-D3(BJ)/def2-SVP level. The isovalue is 0.0008 au. The eigenvalues  $\nu$  of the fragment orbitals give the size of the charge migration. The direction of the charge flow of the deformation densities is red→blue.

**Table S1.** The C-O stretching frequencies ( $\text{cm}^{-1}$ ) and the corresponding IR intensity (km/mol) at the BP86-D3(BJ)/def2-SVP level.

| <b>Molecule</b>           | $\bar{\nu}_{\text{CO}}$ | <b>IR Intensity</b> |
|---------------------------|-------------------------|---------------------|
| <b>Free CO</b>            | 2150.5                  | 60.5                |
| <b>Fe(CO)<sub>5</sub></b> | 2033.1                  | 1043.3              |
|                           | 2033.1                  | 1043.3              |
|                           | 2045.2                  | 1236.0              |
|                           | 2051.0                  | 0.0                 |
|                           | 2129.2                  | 0.0                 |
| <b>1<sup>+</sup></b>      | 2051.8                  | 619.5               |
|                           | 2074.4                  | 761.8               |
|                           | 2077.8                  | 203.4               |
|                           | 2091.0                  | 418.4               |
|                           | 2142.8                  | 410.8               |
| <b>5<sup>+</sup></b>      | 2050.8                  | 687.9               |
|                           | 2068.8                  | 192.1               |
|                           | 2077.6                  | 745.7               |
|                           | 2089.7                  | 421.4               |
|                           | 2144.7                  | 217.3               |
| <b>6<sup>+</sup></b>      | 2043.7                  | 666.9               |
|                           | 2068.7                  | 266.0               |
|                           | 2079.7                  | 791.1               |
|                           | 2090.5                  | 386.0               |
|                           | 2145.4                  | 253.7               |
| <b>7</b>                  | 1973.5                  | 967.5               |
|                           | 1985.8                  | 1049.6              |
|                           | 1989.9                  | 375.5               |
|                           | 2000.5                  | 522.5               |
|                           | 2070.6                  | 291.4               |

|           |         |        |
|-----------|---------|--------|
| <b>8</b>  | 1989.4  | 1051.0 |
|           | 1989.5  | 1051.4 |
|           | 2002.2  | 770.0  |
|           | 2005.4  | 0.6    |
|           | 2074.3  | 553.1  |
| <b>9</b>  | 1958.4  | 1023.1 |
|           | 1976.1  | 212.7  |
|           | 1976.6  | 1069.6 |
|           | 1995.1  | 673.9  |
|           | 20163.2 | 276.2  |
| <b>10</b> | 1973.6  | 869.9  |
|           | 1976.9  | 911.7  |
|           | 2007.4  | 519.8  |
|           | 2060.4  | 958.8  |
|           | 2184.7  | 414.8  |
| <b>11</b> | 1988.6  | 963.5  |
|           | 1989.5  | 971.0  |
|           | 2007.4  | 493.2  |
|           | 2058.2  | 1036.3 |
|           | 2156.0  | 481.5  |
| <b>12</b> | 1964.3  | 824.0  |
|           | 1984.1  | 945.3  |
|           | 2011.1  | 584.6  |
|           | 2054.1  | 977.8  |
|           | 2128.3  | 125.1  |

---

**Table S2.** EDA-NOCV results for complex **12** at the BP86-D3(BJ)/TZ2P-ZORA//BP86-D3(BJ)/def2-SVP level. Energy values are given in kcal/mol. Partial charges  $q$  using the NBO method.

| Molecule                                | <b>12</b>                                                                                                  |                |
|-----------------------------------------|------------------------------------------------------------------------------------------------------------|----------------|
| Fragments                               | [SIPr] +<br>[NCFe(CO) <sub>4</sub> ] <sup>-</sup> +<br>Cu <sup>+</sup> (d <sup>10</sup> , s <sup>0</sup> ) |                |
| $\Delta E_{\text{int}}$                 |                                                                                                            | -267.3         |
| $\Delta E_{\text{Pauli}}$               |                                                                                                            | 232.7          |
| $\Delta E_{\text{disp}}$                |                                                                                                            | -27.0 (5.4%)   |
| $\Delta E_{\text{elstat}}^{\text{[a]}}$ |                                                                                                            | -338.1 (67.6%) |
| $\Delta E_{\text{orb}}^{\text{[a]}}$    |                                                                                                            | -134.9 (27%)   |
| $\Delta E_{\text{orb}(1)}^{\text{[b]}}$ | [SIPr]→Cu <sup>+</sup> (s)←[NCFe(CO) <sub>4</sub> ] <sup>-</sup><br>(+,+) σ donation                       | -48.9 (36.2%)  |
| $\Delta E_{\text{orb}(2)}^{\text{[b]}}$ | [SIPr]→Cu <sup>+</sup> (p) σ donation                                                                      | -15.5 (11.5%)  |
| $\Delta E_{\text{orb}(3)}^{\text{[b]}}$ | [SIPr]→Cu <sup>+</sup> (s)←[NCFe(CO) <sub>4</sub> ] <sup>-</sup><br>Cu <sup>+</sup> polarization           | -16.9 (12.5%)  |
| $\Delta E_{\text{orb}(4)}^{\text{[b]}}$ | [SIPr]←Cu <sup>+</sup> (d) π<br>backdonation                                                               | -14.2 (10.5%)  |
| $\Delta E_{\text{orb}(5)}^{\text{[b]}}$ | Cu <sup>+</sup> (d)→ [NCFe(CO) <sub>4</sub> ] <sup>-</sup> π<br>backdonation                               | -9.8 (7.2%)    |
| $\Delta E_{\text{orb}(6)}^{\text{[b]}}$ | [SIPr]←Cu <sup>+</sup> (d) π<br>backdonation                                                               | -7.8 (5.8%)    |
| $\Delta E_{\text{rest}}^{\text{[b]}}$   |                                                                                                            | -21.8 (16.2%)  |
| $q[\text{Fe}(\text{CO})_4]\text{CN}^-$  |                                                                                                            | -0.80          |
| $q(\text{Cu})$                          |                                                                                                            | 0.73           |
| $q(\text{SIPr})$                        |                                                                                                            | 0.07           |

<sup>[a]</sup>The values in parentheses give the percentage contribution to the total attractive interactions  $\Delta E_{\text{elstat}} + \Delta E_{\text{orb}} + \Delta E_{\text{disp}}$ .

<sup>[b]</sup>The values in parentheses give the percentage contribution to the total orbital interactions  $\Delta E_{\text{orb}}$ .

**Table S3.** The Cartesian coordinates of studied complexes at the BP86-D3(BJ)/def2-SVP level.

|                                       |
|---------------------------------------|
| <b>1<sup>+</sup></b>                  |
| <b>E = -3355.357502 au</b>            |
| 1 1                                   |
| Au 1.03473000 0.00880100 -0.07191200  |
| P -1.33372500 0.00412100 0.01397200   |
| O 6.60620500 -0.11466900 0.29989500   |
| O 3.34055200 0.78865700 -2.89943700   |
| O 3.36023500 -2.83584400 -0.90091400  |
| O 2.74266400 -0.75365000 2.67738100   |
| O 3.38368400 2.86235100 0.67700000    |
| C 5.46444900 -0.07132200 0.16166400   |
| C 3.45315700 0.48017700 -1.79413900   |
| C 3.47088500 -1.73767500 -0.57224400  |
| C 3.03572000 -0.45802100 1.59914100   |
| C 3.48527600 1.75081800 0.39389800    |
| C -1.78925400 0.10523200 1.79259100   |
| C -1.10456100 1.07538900 2.59209800   |
| C -1.33105300 1.09556700 3.97914800   |
| H -0.80676100 1.85275400 4.58465100   |
| C -2.21264100 0.20042800 4.61211500   |
| C -2.92296000 -0.69452000 3.79387900  |
| H -3.66756000 -1.36294700 4.25586500  |
| C -2.75266000 -0.75922100 2.39649400  |
| C -0.18531000 2.12926000 2.02032700   |
| H -0.61234900 2.63672200 1.13189400   |
| H 0.78528200 1.69105800 1.69224300    |
| H 0.04425900 2.90018800 2.78012300    |
| C -2.39560000 0.20965600 6.10802200   |
| H -1.64194300 -0.44693500 6.59553800  |
| H -3.39548000 -0.16629900 6.40139200  |
| H -2.26368400 1.22559500 6.53051900   |
| C -3.66657200 -1.69940900 1.64273400  |
| H -4.08442400 -1.23805100 0.72791800  |
| H -4.51475300 -1.99155600 2.29095100  |
| H -3.15896500 -2.63028300 1.31929800  |
| C -1.89092100 -1.57004800 -0.75371800 |
| C -1.21945300 -2.76894600 -0.35391500 |
| C -1.53192500 -3.97342700 -1.00783400 |

H -1.01720000 -4.89339000 -0.68596500  
C -2.48698600 -4.04582200 -2.03823200  
C -3.17993300 -2.86658100 -2.36194800  
H -3.97879600 -2.90869900 -3.12005200  
C -2.92475900 -1.62944100 -1.73749700  
C -0.22527400 -2.82981800 0.78273100  
H 0.75178100 -2.37811800 0.49526000  
H -0.02695800 -3.88009200 1.06915100  
H -0.56929100 -2.28557300 1.68520600  
C -2.76431500 -5.34040100 -2.75835600  
H -2.08459700 -5.45269800 -3.63138200  
H -3.80168000 -5.38030900 -3.14515100  
H -2.59931400 -6.21791700 -2.10215400  
C -3.82729000 -0.47633200 -2.11603900  
H -4.16980600 0.09785200 -1.23420900  
H -4.72448900 -0.86236800 -2.63655400  
H -3.33847200 0.25320200 -2.79255000  
C -1.89945200 1.47264400 -0.93360200  
C -1.29826700 1.69438700 -2.21405500  
C -1.60772300 2.87298400 -2.91498900  
H -1.14687400 3.03077600 -3.90366200  
C -2.49550900 3.83969100 -2.40838200  
C -3.12290100 3.56283800 -1.18141100  
H -3.86989700 4.27368600 -0.79233600  
C -2.86532600 2.39751100 -0.43224500  
C -0.39318700 0.69318700 -2.89015200  
H 0.56967600 0.56996800 -2.34003700  
H -0.14373500 1.01840200 -3.91757600  
H -0.84438800 -0.31865800 -2.94470900  
C -2.77025600 5.11802000 -3.15801200  
H -2.03372800 5.90126600 -2.87364700  
H -3.77755800 5.51875500 -2.92989300  
H -2.68780300 4.97616900 -4.25391000  
C -3.69541200 2.19094600 0.81495100  
H -4.07469400 1.15498500 0.90203400  
H -4.56914500 2.87005200 0.79650400  
H -3.13385400 2.39669300 1.74829900  
Fe 3.66472000 -0.00356200 -0.05542900

5<sup>+</sup>

**E = -3126.494303 au**

1 1

Au 0.00000000 0.00000000 0.48025500  
Fe 0.00000000 0.00000000 3.07517800  
O 0.00000000 0.00000000 6.03893700  
O 0.00000000 2.85781400 2.23944200  
O -2.96920100 0.00000000 2.96645700  
O 0.00000000 -2.85781400 2.23944200  
O 2.96920100 0.00000000 2.96645700  
N 0.00000000 1.10230900 -2.29828500  
N 0.00000000 -1.10230900 -2.29828500  
C 0.00000000 0.00000000 4.88745500  
C 0.00000000 1.73665100 2.51739700  
C -1.81882700 0.00000000 3.00174500  
C 0.00000000 -1.73665100 2.51739700  
C 1.81882700 0.00000000 3.00174500  
C 0.00000000 0.00000000 -1.53863900  
C 0.00000000 0.77624500 -3.74544000  
H 0.89708300 1.21325100 -4.23040900  
H -0.89708300 1.21325100 -4.23040900  
C 0.00000000 -0.77624500 -3.74544000  
H -0.89708300 -1.21325100 -4.23040900  
H 0.89708300 -1.21325100 -4.23040900  
C 0.00000000 2.43930800 -1.76832800  
C -1.24379100 3.06368400 -1.50092800  
C -1.21639100 4.36766000 -0.96965100  
H -2.16353400 4.88181800 -0.74556300  
C 0.00000000 5.01619400 -0.71378300  
H 0.00000000 6.03634800 -0.30008000  
C 1.21639100 4.36766000 -0.96965100  
H 2.16353400 4.88181800 -0.74556300  
C 1.24379100 3.06368400 -1.50092800  
C -2.56698300 2.33026700 -1.68842600  
H -2.35950800 1.39432300 -2.24968600  
C -3.13053800 1.91637100 -0.31361100  
H -2.39396600 1.29506200 0.24029100  
H -4.06337700 1.32672300 -0.42331300  
H -3.35675100 2.80608200 0.30987300  
C -3.58896300 3.14401900 -2.50170100  
H -3.89274200 4.06957600 -1.97050300  
H -4.50873900 2.54923500 -2.67649700  
H -3.17782900 3.44244200 -3.48741500



C 2.56698300 2.33026700 -1.68842600  
H 2.35950800 1.39432300 -2.24968600  
C 3.13053800 1.91637100 -0.31361100  
H 3.35675100 2.80608200 0.30987300  
H 4.06337700 1.32672300 -0.42331300  
H 2.39396600 1.29506200 0.24029100  
C 3.58896300 3.14401900 -2.50170100  
H 3.17782900 3.44244200 -3.48741500  
H 4.50873900 2.54923500 -2.67649700  
H 3.89274200 4.06957600 -1.97050300  
C 0.00000000 -2.43930800 -1.76832800  
C -1.24379100 -3.06368400 -1.50092800  
C -1.21639100 -4.36766000 -0.96965100  
H -2.16353400 -4.88181800 -0.74556300  
C 0.00000000 -5.01619400 -0.71378300  
H 0.00000000 -6.03634800 -0.30008000  
C 1.21639100 -4.36766000 -0.96965100  
H 2.16353400 -4.88181800 -0.74556300  
C 1.24379100 -3.06368400 -1.50092800  
C -2.56698300 -2.33026700 -1.68842600  
H -2.35950800 -1.39432300 -2.24968600  
C -3.13053800 -1.91637100 -0.31361100  
H -3.35675100 -2.80608200 0.30987300  
H -4.06337700 -1.32672300 -0.42331300  
H -2.39396600 -1.29506200 0.24029100  
C -3.58896300 -3.14401900 -2.50170100  
H -3.17782900 -3.44244200 -3.48741500  
H -4.50873900 -2.54923500 -2.67649700  
H -3.89274200 -4.06957600 -1.97050300  
C 2.56698300 -2.33026700 -1.68842600  
H 2.35950800 -1.39432300 -2.24968600  
C 3.58896300 -3.14401900 -2.50170100  
H 3.89274200 -4.06957600 -1.97050300  
H 4.50873900 -2.54923500 -2.67649700  
H 3.17782900 -3.44244200 -3.48741500  
C 3.13053800 -1.91637100 -0.31361100  
H 2.39396600 -1.29506200 0.24029100  
H 4.06337700 -1.32672300 -0.42331300  
H 3.35675100 -2.80608200 0.30987300

6<sup>+</sup>

E = -2879.532581 au

1 1

Au -0.60973000 0.54726700 -0.00683700  
Fe -3.16045100 -0.09114800 0.04089900  
O -6.06694700 -0.66726200 0.10363600  
O -3.08930400 0.19451000 2.99648100  
O -1.74186600 -2.69713400 0.26275200  
O -3.11129200 -0.33299400 -2.91875700  
O -2.93256500 2.86227500 -0.23273700  
N 2.27986400 0.01925000 -0.04029800  
C 1.36867100 0.96009600 -0.07855700  
C 3.72668500 0.52821400 -0.10452000  
C 3.49075300 2.02721300 -0.42708600  
H 3.73369900 2.22046300 -1.48999800  
H 4.15628400 2.67299400 0.17670300  
C 1.98832200 2.33359000 -0.15685400  
C 1.94836500 -1.38943200 0.08991300  
C 1.76414200 -2.15094300 -1.09430900  
C 1.48975100 -3.52430100 -0.94608200  
H 1.34491300 -4.14281700 -1.84464800  
C 1.38163600 -4.11072500 0.32125400  
H 1.17438900 -5.18773200 0.41325400  
C 1.50220000 -3.32063200 1.47096000  
H 1.36748800 -3.78073500 2.46151100  
C 1.77621200 -1.94099200 1.38701800  
C 1.72534800 -1.52251400 -2.48439300  
H 2.10590300 -0.48534700 -2.40442700  
C 2.59571200 -2.26710200 -3.51118300  
H 3.64443100 -2.36515100 -3.16664700  
H 2.59993500 -1.72508400 -4.47869800  
H 2.21168800 -3.28847400 -3.71088000  
C 0.26216700 -1.41818200 -2.95990000  
H -0.20648900 -2.41971400 -3.05280700  
H 0.19750800 -0.91291000 -3.94503500  
H -0.33817300 -0.83060400 -2.23196900  
C 1.75527100 -1.09774800 2.65923400  
H 2.11253000 -0.08138000 2.40514700  
C 2.66717500 -1.65456400 3.76650100  
H 2.30966200 -2.63771200 4.13551900  
H 2.68492200 -0.96572300 4.63542000  
H 3.70937500 -1.78946000 3.41406600

C 0.30404000 -0.94297800 3.15739200  
H -0.32458300 -0.47222300 2.37081800  
H 0.25983600 -0.29952300 4.05966000  
H -0.14657300 -1.92483500 3.41012500  
C 4.50838900 -0.20433100 -1.19907300  
H 4.54364100 -1.29614300 -1.01238300  
H 5.55025500 0.17288900 -1.20199700  
H 4.08265700 -0.02556300 -2.20406700  
C 4.41410300 0.30602000 1.25034800  
H 3.92178800 0.86559600 2.06825900  
H 5.46062400 0.66234700 1.17858700  
H 4.44108100 -0.76867400 1.51662900  
C 1.32026200 3.16822100 -1.28107100  
H 0.29362100 3.43490500 -0.94546000  
H 1.87499500 4.12537400 -1.37017800  
C 1.24939500 2.47579300 -2.64567900  
H 2.25182000 2.18233700 -3.02138800  
H 0.80310700 3.14757300 -3.40535600  
H 0.62474300 1.55864600 -2.60562900  
C 1.75074800 2.99693500 1.23935100  
H 0.65776400 2.97681900 1.44594700  
H 2.21626100 2.35290600 2.01701400  
C 2.27799800 4.42840300 1.37000400  
H 3.36211400 4.49622500 1.14261800  
H 2.13650500 4.79249700 2.40719600  
H 1.74646300 5.13133500 0.69854200  
C -4.93767500 -0.44396000 0.07883500  
C -3.10535200 0.08511800 1.85108400  
C -2.26364000 -1.67113000 0.17653600  
C -3.11840900 -0.23816700 -1.77194100  
C -2.95011500 1.71022500 -0.12404500

7

**E = -3013.984792 au**

0 1

Au 0.00000000 0.00000000 0.50327600  
Mn 0.00000000 0.00000000 3.09045500  
O 0.00000000 0.00000000 6.06211800  
O 2.96938700 -0.34608600 2.86237500  
O 0.34069400 2.89441100 2.39313200

O -2.96938700 0.34608600 2.86237500  
N -0.03013700 1.09675400 -2.30376300  
C 0.00000000 0.00000000 4.89646700  
C 1.81594600 -0.21255300 2.95185000  
C 0.20669500 1.76651500 2.66043800  
C -1.81594600 0.21255300 2.95185000  
C 0.00000000 0.00000000 -1.52410800  
C 0.05512100 0.77248300 -3.74525000  
H 1.02177000 1.13680400 -4.15662100  
H -0.76263400 1.27013300 -4.30549300  
C 0.00000000 2.43525600 -1.78571700  
C 1.24865000 3.01694400 -1.45588700  
C 1.24212600 4.32534300 -0.93473600  
H 2.19483900 4.80025600 -0.65350000  
C 0.04042500 5.02050400 -0.74623400  
H 0.05655000 6.03955700 -0.32949700  
C -1.18440600 4.41419400 -1.05973200  
H -2.12339400 4.95848000 -0.87621600  
C -1.23061500 3.10760600 -1.58122200  
C 2.55615500 2.24207400 -1.57269900  
H 2.33049400 1.26820800 -2.05603100  
C 3.11414800 1.92868500 -0.17059400  
H 3.36118300 2.85858200 0.38222000  
H 4.03382200 1.31218600 -0.23708100  
H 2.36735000 1.36968500 0.43030600  
C 3.58788200 2.97089100 -2.45295800  
H 3.18399100 3.18177400 -3.46496600  
H 4.50591200 2.35763100 -2.56713100  
H 3.89183700 3.94051300 -2.00583800  
C -2.56129400 2.39752300 -1.79929000  
H -2.36163500 1.50078800 -2.42419700  
C -3.10040300 1.89429100 -0.44405300  
H -2.35400100 1.24847300 0.06493700  
H -4.03329700 1.30844600 -0.57682200  
H -3.31934400 2.74408200 0.23531100  
C -3.59447400 3.26218500 -2.54056900  
H -3.89911000 4.14429200 -1.93942700  
H -4.51410200 2.67587200 -2.74536600  
H -3.19813600 3.63406600 -3.50801200  
O -0.34069400 -2.89441100 2.39313200  
N 0.03013700 -1.09675400 -2.30376300  
C -0.20669500 -1.76651500 2.66043800  
C -0.05512100 -0.77248300 -3.74525000

H 0.76263400 -1.27013300 -4.30549300  
H -1.02177000 -1.13680400 -4.15662100  
C 0.00000000 -2.43525600 -1.78571700  
C 1.23061500 -3.10760600 -1.58122200  
C 1.18440600 -4.41419400 -1.05973200  
H 2.12339400 -4.95848000 -0.87621600  
C -0.04042500 -5.02050400 -0.74623400  
H -0.05655000 -6.03955700 -0.32949700  
C -1.24212600 -4.32534300 -0.93473600  
H -2.19483900 -4.80025600 -0.65350000  
C -1.24865000 -3.01694400 -1.45588700  
C 2.56129400 -2.39752300 -1.79929000  
H 2.36163500 -1.50078800 -2.42419700  
C 3.10040300 -1.89429100 -0.44405300  
H 3.31934400 -2.74408200 0.23531100  
H 4.03329700 -1.30844600 -0.57682200  
H 2.35400100 -1.24847300 0.06493700  
C 3.59447400 -3.26218500 -2.54056900  
H 3.19813600 -3.63406600 -3.50801200  
H 4.51410200 -2.67587200 -2.74536600  
H 3.89911000 -4.14429200 -1.93942700  
C -2.55615500 -2.24207400 -1.57269900  
H -2.33049400 -1.26820800 -2.05603100  
C -3.11414800 -1.92868500 -0.17059400  
H -2.36735000 -1.36968500 0.43030600  
H -4.03382200 -1.31218600 -0.23708100  
H -3.36118300 -2.85858200 0.38222000  
C -3.58788200 -2.97089100 -2.45295800  
H -3.89183700 -3.94051300 -2.00583800  
H -4.50591200 -2.35763100 -2.56713100  
H -3.18399100 -3.18177400 -3.46496600

**8**

**E = -3242.852901 au**

0 1

Au -1.07941900 0.00139300 0.05682000  
Mn -3.67600000 -0.00066000 0.03630600  
P 1.30533800 0.00137000 -0.00821800  
O -6.64147200 -0.00779900 -0.08937600  
O -3.14481100 -1.90900200 -2.21604500

O -3.16690300 2.27131500 -1.85381500  
O -3.33602100 1.90912800 2.32004400  
O -3.31282900 -2.26720000 1.96298500  
C -5.47761400 -0.00493100 -0.03891900  
C -3.34875300 -1.16944500 -1.34017600  
C -3.36326500 1.39042800 -1.11819600  
C -3.46915200 1.16572200 1.43380000  
C -3.45451300 -1.38552600 1.21571200  
C 1.92823100 -0.76433900 1.55109700  
C 1.29004800 -1.97739500 1.96612400  
C 1.61083200 -2.52182100 3.22241300  
H 1.11423600 -3.45773600 3.52721200  
C 2.54050700 -1.92103900 4.08951300  
C 3.20167200 -0.77008600 3.63138500  
H 3.97932800 -0.31219000 4.26504500  
C 2.93615400 -0.18282100 2.37702500  
C 0.32052700 -2.74141000 1.09748600  
H -0.63178200 -2.17899200 0.95898700  
H 0.06944700 -3.71697000 1.55520400  
H 0.71848100 -2.92461900 0.07846400  
C 2.81783900 -2.49666700 5.45646000  
H 2.05268800 -2.15649400 6.18845100  
H 3.80711000 -2.17924400 5.84233300  
H 2.78551400 -3.60517300 5.44710600  
C 3.80592300 0.98881300 1.97874900  
H 4.15437300 0.91402100 0.93095200  
H 4.69852600 1.02972300 2.63312500  
H 3.28450000 1.96363400 2.06085300  
C 1.87603900 1.75039600 -0.15465700  
C 1.25049200 2.70118700 0.71463300  
C 1.52934300 4.06891400 0.54366200  
H 1.04361100 4.78896800 1.22268700  
C 2.40454000 4.54162200 -0.45002900  
C 3.05589200 3.58536700 -1.24567400  
H 3.79289300 3.92386200 -1.99278300  
C 2.83137300 2.19930800 -1.11499100  
C 0.33730500 2.30829100 1.85011700  
H -0.62294900 1.88576300 1.47351700  
H 0.09285700 3.18491700 2.47946400  
H 0.77992500 1.52525300 2.49917500  
C 2.63552100 6.01950200 -0.64803600  
H 1.83469900 6.46043700 -1.28149400  
H 3.60199100 6.21982200 -1.15215900

H 2.62369900 6.56765600 0.31593700  
C 3.68769500 1.29035300 -1.96841700  
H 4.08574600 0.43132500 -1.39533100  
H 4.54796900 1.85944900 -2.37173400  
H 3.13771900 0.85861100 -2.82863600  
C 1.83451400 -0.98420700 -1.47692000  
C 1.14320000 -0.72742800 -2.70460900  
C 1.39417000 -1.55333400 -3.81457700  
H 0.85662800 -1.34224900 -4.75367300  
C 2.30383900 -2.62447800 -3.76759100  
C 3.01869600 -2.81306600 -2.57399500  
H 3.78252200 -3.60701900 -2.52784800  
C 2.82451700 -2.01084200 -1.43045000  
C 0.18580300 0.42467800 -2.89184300  
H -0.75000400 0.27358300 -2.30592200  
H -0.09660500 0.52996000 -3.95660500  
H 0.60854600 1.39010200 -2.54647200  
C 2.50448900 -3.53017600 -4.95757400  
H 1.71169300 -4.30923300 -4.99582200  
H 3.48019700 -4.05399000 -4.91476300  
H 2.45097200 -2.96813800 -5.91217900  
C 3.74658300 -2.26668700 -0.25897900  
H 4.13478300 -1.32834100 0.18090800  
H 4.61278700 -2.87121900 -0.59196500  
H 3.25359300 -2.81439000 0.56924800

**9**

**E = -3025.161378 au**

0 1

Ag 0.00000000 0.00000000 0.59369100  
Mn 0.00000000 0.00000000 3.15515000  
O 0.00000000 0.00000000 6.12484800  
O 2.96875600 -0.32961400 2.90252700  
O 0.31223600 2.89222600 2.43415200  
O -2.96875600 0.32961400 2.90252700  
N -0.03273400 1.09317000 -2.26854100  
C 0.00000000 0.00000000 4.95875500  
C 1.81382400 -0.20095400 3.00093300  
C 0.19054400 1.76096700 2.70399600  
C -1.81382400 0.20095400 3.00093300

C 0.00000000 0.00000000 -1.48654200  
C 0.05973900 0.77115500 -3.71277500  
H 1.03209600 1.13033300 -4.11523800  
H -0.75020900 1.27540700 -4.27807500  
C 0.00000000 2.43452300 -1.75778300  
C 1.24752800 3.01362200 -1.41935800  
C 1.24215600 4.32886100 -0.91470200  
H 2.19399600 4.80179300 -0.62743200  
C 0.04281000 5.03382400 -0.75161100  
H 0.05986000 6.05845300 -0.34890600  
C -1.18189800 4.43054600 -1.07249900  
H -2.11934600 4.98327600 -0.90871600  
C -1.22901400 3.11770600 -1.57735200  
C 2.55197900 2.22984700 -1.50728800  
H 2.33188600 1.25778300 -1.99674100  
C 3.07220900 1.91405800 -0.09135700  
H 3.30889500 2.84266700 0.46792500  
H 3.98909500 1.29153200 -0.13161100  
H 2.30810400 1.36165400 0.49402800  
C 3.61124000 2.95082700 -2.36059900  
H 3.23366100 3.16694500 -3.38154100  
H 4.52574400 2.32891000 -2.45391200  
H 3.91412700 3.91650900 -1.90450200  
C -2.55842300 2.40639000 -1.79941100  
H -2.36420500 1.53577200 -2.46210900  
C -3.06550000 1.84766200 -0.45338500  
H -2.30777600 1.18377500 0.01376300  
H -3.99978200 1.26428100 -0.58687200  
H -3.26864400 2.66884500 0.26461300  
C -3.61611200 3.28687100 -2.48434200  
H -3.92703000 4.13446900 -1.83854900  
H -4.52888200 2.69486100 -2.70242000  
H -3.24091500 3.70924800 -3.43929700  
O -0.31223600 -2.89222600 2.43415200  
N 0.03273400 -1.09317000 -2.26854100  
C -0.19054400 -1.76096700 2.70399600  
C -0.05973900 -0.77115500 -3.71277500  
H 0.75020900 -1.27540700 -4.27807500  
H -1.03209600 -1.13033300 -4.11523800  
C 0.00000000 -2.43452300 -1.75778300  
C 1.22901400 -3.11770600 -1.57735200  
C 1.18189800 -4.43054600 -1.07249900  
H 2.11934600 -4.98327600 -0.90871600



C -0.04281000 -5.03382400 -0.75161100  
H -0.05986000 -6.05845300 -0.34890600  
C -1.24215600 -4.32886100 -0.91470200  
H -2.19399600 -4.80179300 -0.62743200  
C -1.24752800 -3.01362200 -1.41935800  
C 2.55842300 -2.40639000 -1.79941100  
H 2.36420500 -1.53577200 -2.46210900  
C 3.06550000 -1.84766200 -0.45338500  
H 3.26864400 -2.66884500 0.26461300  
H 3.99978200 -1.26428100 -0.58687200  
H 2.30777600 -1.18377500 0.01376300  
C 3.61611200 -3.28687100 -2.48434200  
H 3.24091500 -3.70924800 -3.43929700  
H 4.52888200 -2.69486100 -2.70242000  
H 3.92703000 -4.13446900 -1.83854900  
C -2.55197900 -2.22984700 -1.50728800  
H -2.33188600 -1.25778300 -1.99674100  
C -3.07220900 -1.91405800 -0.09135700  
H -2.30810400 -1.36165400 0.49402800  
H -3.98909500 -1.29153200 -0.13161100  
H -3.30889500 -2.84266700 0.46792500  
C -3.61124000 -2.95082700 -2.36059900  
H -3.91412700 -3.91650900 -1.90450200  
H -4.52574400 -2.32891000 -2.45391200  
H -3.23366100 -3.16694500 -3.38154100

**10**

**E = -4716.624869 au**

0 1

Au 0.63818200 -0.28766200 -0.31437500  
N -2.19452800 0.87534400 -0.17789900  
N -1.36070800 0.35699100 1.75145500  
C -1.07921000 0.35493700 0.41147100  
C -3.16239700 1.19500700 0.78368200  
H -4.12444700 1.63082400 0.50127500  
C -2.63260600 0.86261500 2.00338800  
H -3.03169100 0.94571100 3.01707900  
C -2.39091400 1.10263500 -1.58531200  
C -1.89581900 2.28653200 -2.16706700  
C -2.24243600 2.55718600 -3.50406700

H -1.87668000 3.48951100 -3.96247600  
C -3.02461600 1.66472700 -4.26154200  
C -3.42297100 0.44764400 -3.66761000  
H -3.98536000 -0.29131000 -4.25935100  
C -3.10739800 0.14248800 -2.33466200  
C -0.89793000 3.16042100 -1.42143700  
H -1.04220500 2.97059400 -0.33685500  
C -1.17992300 4.64608900 -1.63118100  
C -0.37445100 5.46183900 -2.44790400  
H 0.51464000 5.02963700 -2.93199400  
C -0.69318200 6.81920200 -2.63412500  
H -0.05276700 7.44588500 -3.27463600  
C -1.81745100 7.37661100 -2.00365000  
H -2.06244300 8.44072900 -2.14611900  
C -2.62808600 6.56733300 -1.18604000  
H -3.51200600 6.99574500 -0.68712500  
C -2.31043100 5.21317600 -1.00473700  
H -2.94494500 4.57729200 -0.36584700  
C 0.54629700 2.75349200 -1.74209200  
C 1.58547400 3.21986000 -0.90763900  
H 1.35005400 3.86818700 -0.04861700  
C 2.92157700 2.87251400 -1.15870300  
H 3.71110700 3.23635000 -0.48538000  
C 3.24529500 2.04616900 -2.24839400  
H 4.28849700 1.74784500 -2.43004700  
C 2.22301900 1.57871600 -3.08721400  
H 2.46634200 0.91296600 -3.92874100  
C 0.88512700 1.92916600 -2.83541300  
H 0.09430700 1.54074000 -3.49256400  
C -3.42295900 1.99159700 -5.68044000  
H -4.46541800 2.37688200 -5.71608000  
H -3.38771100 1.09333100 -6.32967000  
H -2.76713700 2.76791600 -6.12125300  
C -3.35048200 -1.23972600 -1.74151500  
H -3.50643000 -1.09957400 -0.65039000  
C -4.61800300 -1.89821400 -2.27086200  
C -5.85955100 -1.57934900 -1.68327100  
H -5.88737800 -0.88107300 -0.82988400  
C -7.05047500 -2.13861700 -2.17242100  
H -8.01201500 -1.88412000 -1.69912000  
C -7.01392800 -3.02667600 -3.26236500  
H -7.94605600 -3.46962200 -3.64657700  
C -5.78080700 -3.35242300 -3.85230600

H -5.74374900 -4.05288200 -4.70150100  
C -4.58951500 -2.79442400 -3.35747900  
H -3.62094300 -3.06409800 -3.80660200  
C -2.10199200 -2.12092200 -1.88706200  
C -2.03623300 -3.33043200 -1.16174300  
H -2.88905200 -3.63940600 -0.53672700  
C -0.90055300 -4.14979400 -1.23052400  
H -0.86129100 -5.07745500 -0.64015200  
C 0.19252800 -3.77516200 -2.03236900  
H 1.09704100 -4.40112700 -2.06173800  
C 0.13146200 -2.58685600 -2.77421400  
H 0.98742200 -2.27541700 -3.39169200  
C -1.00885700 -1.76461200 -2.70159100  
H -1.03337300 -0.82680100 -3.27430900  
C -0.41453000 -0.10249500 2.73327500  
C 0.53190500 0.81354700 3.24279300  
C 1.40852700 0.36067600 4.24028300  
H 2.15699100 1.06040800 4.64276600  
C 1.38717100 -0.97684400 4.69164200  
C 0.50644600 -1.88248300 4.07093000  
H 0.55299000 -2.95141800 4.33109900  
C -0.39397200 -1.46815200 3.07190100  
C 0.63143100 2.20570200 2.62515900  
H 0.50051400 2.05272100 1.52965000  
C 2.03506500 2.78439900 2.77340200  
C 3.09260600 2.13914500 2.09400600  
H 2.87549700 1.26185300 1.46232800  
C 4.40951200 2.60534800 2.21299400  
H 5.21673200 2.09037400 1.66962500  
C 4.68515700 3.73118100 3.01269600  
H 5.71788400 4.10258600 3.10503400  
C 3.63886400 4.37993600 3.68855800  
H 3.84832200 5.26255300 4.31352200  
C 2.31801600 3.90773400 3.57102200  
H 1.49884800 4.41864400 4.10024500  
C -0.49303300 3.13386000 3.06465300  
C -0.88390700 4.19884100 2.22611900  
H -0.35458400 4.36592500 1.27533700  
C -1.93463300 5.05433200 2.58957300  
H -2.22093600 5.87589800 1.91489800  
C -2.61336200 4.85869200 3.80610800  
H -3.44122400 5.52604300 4.09272500  
C -2.22246300 3.81085000 4.65666800

H -2.74152700 3.65557400 5.61586900  
C -1.16810600 2.95634000 4.28832100  
H -0.86912400 2.13053800 4.95288700  
C 2.32880500 -1.42796800 5.78207000  
H 3.35645700 -1.04803500 5.60776400  
H 2.37436900 -2.53241600 5.85167800  
H 2.00465200 -1.04016900 6.77224500  
C -1.26582300 -2.45333600 2.30093200  
H -1.39359700 -2.03352500 1.27925600  
C -2.66299300 -2.55471900 2.89719200  
C -2.86343200 -2.76913900 4.27651200  
H -1.99128900 -2.86142700 4.94231700  
C -4.16141700 -2.85573100 4.80604300  
H -4.30045000 -3.02407300 5.88569500  
C -5.28122500 -2.72476900 3.96471100  
H -6.29816000 -2.79140200 4.38210100  
C -5.09304700 -2.50636700 2.58942000  
H -5.95925700 -2.40215700 1.91714000  
C -3.79287400 -2.42105900 2.06613400  
H -3.64518700 -2.24418300 0.99028400  
C -0.54335100 -3.78034100 2.07420800  
C 0.75035800 -3.74296000 1.50525500  
H 1.21159300 -2.76987000 1.27057000  
C 1.44152400 -4.92602800 1.21321500  
H 2.44473700 -4.87395800 0.76229300  
C 0.84050100 -6.17204000 1.47674700  
H 1.37755600 -7.10481600 1.24362500  
C -0.44819200 -6.21892000 2.03360500  
H -0.92618800 -7.18997400 2.23869400  
C -1.13720000 -5.02766200 2.33394200  
H -2.14902800 -5.07008700 2.76518600  
Fe 5.22734700 -1.68254600 -1.82625400  
O 4.69162800 -4.33392200 -0.63942100  
O 6.13815600 0.54300400 -0.11127000  
O 4.19449700 -1.10041300 -4.53056000  
O 7.94234300 -2.37198000 -2.75559800  
N 2.42718700 -0.94475300 -0.88937900  
C 3.51279900 -1.24001000 -1.24385400  
C 4.93893100 -3.29702200 -1.11530500  
C 5.80862600 -0.34606500 -0.79360500  
C 4.63572100 -1.33933100 -3.47590200  
C 6.87283800 -2.10122100 -2.38867800

**11**

**E = -3117.394957 au**

0 1

Fe 5.04004700 0.08748500 0.01272700  
O 4.92161400 2.94718100 0.75005900  
O 4.87776100 -0.70031600 -2.83070300  
O 4.90688400 -1.98394800 2.11625400  
O 7.98849800 0.07675300 -0.00482500  
N 1.98454900 0.08713700 0.02771200  
N -2.88839700 1.02630700 -0.01298800  
N -2.80841500 -1.16214100 -0.01140100  
C 3.16801000 0.09027900 0.02353400  
C 4.97820400 1.81890700 0.45926300  
C 4.95468700 -0.38956000 -1.70875300  
C 4.97150000 -1.16658700 1.28621800  
C 6.82458200 0.08125600 0.00221400  
C -2.06478700 -0.03927400 -0.00429200  
C -4.31183700 0.64003700 -0.15339600  
H -4.66564800 0.89658100 -1.17652800  
H -4.94280500 1.18749400 0.57480600  
C -4.25892200 -0.88126900 0.09776600  
H -4.61537500 -1.16387100 1.11309000  
H -4.83204300 -1.47277300 -0.64369900  
C -2.43939400 2.38551600 -0.11719100  
C -2.38405500 3.16348000 1.06721900  
C -1.94476500 4.49553900 0.95534500  
H -1.87989000 5.12466500 1.85557000  
C -1.57058000 5.02641500 -0.28874100  
H -1.22371600 6.06925000 -0.35648300  
C -1.62046800 4.23235500 -1.44180000  
H -1.30576900 4.65640500 -2.40802900  
C -2.05644400 2.89309900 -1.38288500  
C -2.68815400 2.53521500 2.42298300  
H -3.36372100 1.67093800 2.24410900  
C -3.40231100 3.48907700 3.39376600  
H -2.74596000 4.32879500 3.70369100  
H -3.69407700 2.94991500 4.31838400  
H -4.31821900 3.92306700 2.94257900  
C -1.38861900 1.97223600 3.03690600  
H -0.90016500 1.24646000 2.35336000

H -1.59400700 1.45722700 3.99842400  
H -0.65953800 2.78671400 3.22825100  
C -2.06488500 2.03229600 -2.64148100  
H -2.45129200 1.02874600 -2.36580000  
C -0.63309700 1.83163300 -3.17517800  
H -0.17844800 2.79453000 -3.48785300  
H -0.63151700 1.15389500 -4.05326500  
H 0.02564600 1.38880600 -2.39832100  
C -3.00161700 2.60862700 -3.72034400  
H -4.03563200 2.73377200 -3.33718400  
H -3.03850200 1.93826100 -4.60409200  
H -2.65362800 3.60260800 -4.07135500  
C -2.26252200 -2.48502300 0.09904100  
C -1.86987900 -2.96786300 1.37147200  
C -1.33501200 -4.27044200 1.43632100  
H -1.00951200 -4.67350400 2.40791600  
C -1.20038300 -5.05343300 0.28244100  
H -0.77693900 -6.06726200 0.35496100  
C -1.58706600 -4.54708700 -0.96799100  
H -1.45552500 -5.16557700 -1.86834700  
C -2.12327600 -3.25149500 -1.08594400  
C -1.97026300 -2.11526300 2.63165700  
H -2.43020600 -1.14465700 2.35082700  
C -0.56905800 -1.80348800 3.19253400  
H -0.04379000 -2.72832200 3.50925400  
H -0.63789400 -1.13265800 4.07328200  
H 0.06582900 -1.30507300 2.42959500  
C -2.87806800 -2.76817200 3.69142100  
H -3.89130700 -2.97435700 3.28833200  
H -2.98515500 -2.10573400 4.57543200  
H -2.45831400 -3.73216000 4.04750600  
C -2.44442600 -2.64297800 -2.44675100  
H -3.18114800 -1.82762900 -2.28016600  
C -1.17554500 -1.99082700 -3.03593500  
H -0.75104100 -1.23448000 -2.34282400  
H -1.39787400 -1.48933400 -4.00080300  
H -0.38836500 -2.75243600 -3.21422500  
C -3.07311200 -3.64221400 -3.43101000  
H -2.35510100 -4.43471700 -3.72825000  
H -3.38337300 -3.12312300 -4.36108500  
H -3.96560700 -4.13837700 -2.99731200  
Ag -0.02839200 0.02959300 0.01351800

12

**E = -4610.899691 au**

0 1

Cu -0.44231300 -0.20936700 -0.72337000  
Fe 4.21266700 -0.35359300 -1.24063800  
O 3.87244400 -2.23670600 1.00731900  
O 3.87563700 2.56502000 -0.94526900  
O 4.53911800 -1.45976100 -3.96369600  
O 7.12027900 -0.17074700 -0.78583900  
N 1.17364600 -0.49618000 -1.56765500  
N -1.27612100 0.56234600 1.79108400  
N -3.08051900 0.13032300 0.62417900  
C 2.35548600 -0.44960800 -1.46597100  
C 4.01507600 -1.48611000 0.12244900  
C 4.01536500 1.40994600 -1.05697800  
C 4.41599800 -1.02361400 -2.89115700  
C 5.97409100 -0.24479600 -0.97078700  
C -1.73392100 0.17441600 0.58116700  
C -2.36199900 0.91925100 2.72739000  
H -2.38683000 2.02262000 2.87035700  
H -2.20234700 0.44877900 3.71824400  
C -3.60738000 0.38324800 1.98759300  
H -3.98721300 -0.56953700 2.41908300  
H -4.44882200 1.10416200 1.95890000  
C 0.12498000 0.78088900 2.03796600  
C 0.86969800 -0.25899400 2.65045600  
C 2.25286500 -0.06642100 2.81802100  
H 2.86440300 -0.86960000 3.25281000  
C 2.87083500 1.11424000 2.38221300  
H 3.95944800 1.23400600 2.48968500  
C 2.11479300 2.13002400 1.78455400  
H 2.61958200 3.03627200 1.41924500  
C 0.72617800 1.98614000 1.59755200  
C 0.21559500 -1.59593800 2.97768700  
H -0.87680700 -1.41776100 3.08132300  
C 0.71378300 -2.21553700 4.29285100  
H 1.78343100 -2.50362000 4.22930000  
H 0.14274800 -3.13801700 4.52592800  
H 0.60073400 -1.51344100 5.14449200  
C 0.41352800 -2.55661300 1.78715800

H 0.04554100 -2.09752600 0.84495900  
H -0.12936900 -3.51164900 1.94739600  
H 1.48894200 -2.77938400 1.63708600  
C -0.06079800 3.07008200 0.86937500  
H -1.13333100 2.78075600 0.88108000  
C 0.37771100 3.14319900 -0.60613000  
H 1.44942200 3.41106900 -0.69820500  
H -0.22038800 3.89323500 -1.16324500  
H 0.25018800 2.15634600 -1.10128400  
C 0.05826900 4.43650400 1.56894000  
H -0.26681800 4.38062100 2.62852100  
H -0.56692700 5.19524200 1.05353700  
H 1.10458600 4.80638800 1.55819300  
C -3.91674700 -0.33024600 -0.44524000  
C -4.04402700 -1.72021700 -0.68417500  
C -4.90498700 -2.12726400 -1.72442400  
H -5.02014100 -3.20040700 -1.94179500  
C -5.61034200 -1.18781300 -2.48721400  
H -6.28220100 -1.52774500 -3.29085100  
C -5.45202000 0.18572900 -2.24441500  
H -5.99216800 0.91317600 -2.86820200  
C -4.59741400 0.64118200 -1.22398600  
C -3.22490800 -2.75000000 0.08548600  
H -2.76039100 -2.23758100 0.95425100  
C -2.07518000 -3.26585900 -0.80344000  
H -2.46488700 -3.74115200 -1.72751900  
H -1.45550000 -4.01011500 -0.26375500  
H -1.40866000 -2.42892600 -1.10996600  
C -4.08338300 -3.90349000 0.63386900  
H -4.91744500 -3.52733000 1.26147200  
H -3.46423500 -4.58459000 1.25344000  
H -4.52458100 -4.51334000 -0.18196300  
C -4.30024400 2.12320300 -1.02566300  
H -4.04737000 2.27217600 0.04635100  
C -3.04371000 2.49844200 -1.84076200  
H -2.18230100 1.85349100 -1.57082500  
H -2.75324900 3.55434000 -1.66165300  
H -3.23102400 2.36900300 -2.92711300  
C -5.48220700 3.04616000 -1.35668600  
H -5.72084700 3.03756300 -2.44081300  
H -5.23725700 4.09451100 -1.08951300  
H -6.39896100 2.75434000 -0.80419500



**Table S4. Bridge asymmetry parameter  $\alpha$  based on parameters from X-ray crystallographic data**

Calculated  $\alpha$ , bridge asymmetry parameter using observed distances (X-ray crystallographic), which is defined by Curtis and co-workers<sup>[10]</sup> as:

$$\alpha = \frac{d2 - d1}{d1}$$

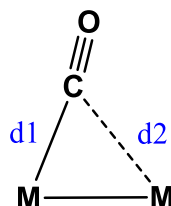

where  $d1$  and  $d2$  are the shorter and longer  $M \cdots CO$  distances, respectively. According to this system, carbonyls with  $\alpha \geq 0.6$  are considered essentially terminal whereas  $\alpha \leq 0.1$  are bridging carbonyls. Carbonyls with  $\alpha$  values in-between these two cut-off points could be considered as semi-bridging carbonyls. Although this is not a definitive system of bridging ligand classification, the calculated  $\alpha$  values for several compounds described in the manuscript are given below as added information.

*Note however that the Fe-C-O and Mn-C-O angles of following complexes are near 180°, and show little to no effect due to CO bending towards the coinage metal ions.*

| <b>Complex</b>                                                                        | Bridge asymmetry parameter $\alpha$ for four cis-CO groups |      |      |      |
|---------------------------------------------------------------------------------------|------------------------------------------------------------|------|------|------|
| [Mes <sub>3</sub> PAuFe(CO) <sub>5</sub> ][SbF <sub>6</sub> ] (1)                     | 0.63                                                       | 0.62 | 0.56 | 0.55 |
| [(IPr*)AuFe(CO) <sub>5</sub> ][SbF <sub>6</sub> ] (2)                                 | 0.44                                                       | 0.69 | 0.55 | 0.67 |
| [(SIPr)AuFe(CO) <sub>5</sub> ][SbF <sub>6</sub> ] (5)                                 | 0.46                                                       | 0.66 | 0.51 | 0.66 |
| [( <sup>Et</sup> 2CAAC)Au(Fe(CO) <sub>5</sub> )] <sub>i</sub> [SbF <sub>6</sub> ] (6) | 0.52                                                       | 0.58 | 0.57 | 0.66 |
| [(SIPr)AuMn(CO) <sub>5</sub> ] (7)                                                    | 0.47                                                       | 0.63 | 0.61 | 0.63 |
| [Mes <sub>3</sub> PAuMn(CO) <sub>5</sub> ] (8)                                        | 0.50                                                       | 0.65 | 0.49 | 0.69 |
| [(SIPr)AgMn(CO) <sub>5</sub> ] (9)                                                    | 0.46                                                       | 0.65 | 0.57 | 0.65 |

**Figure S10.**  $^1\text{H}$  NMR spectrum of  $[(\text{SIPr})\text{Au-Fe}(\text{CO})_5][\text{SbF}_6]$  (**5**) (500.16 MHz) in  $\text{CD}_2\text{Cl}_2$

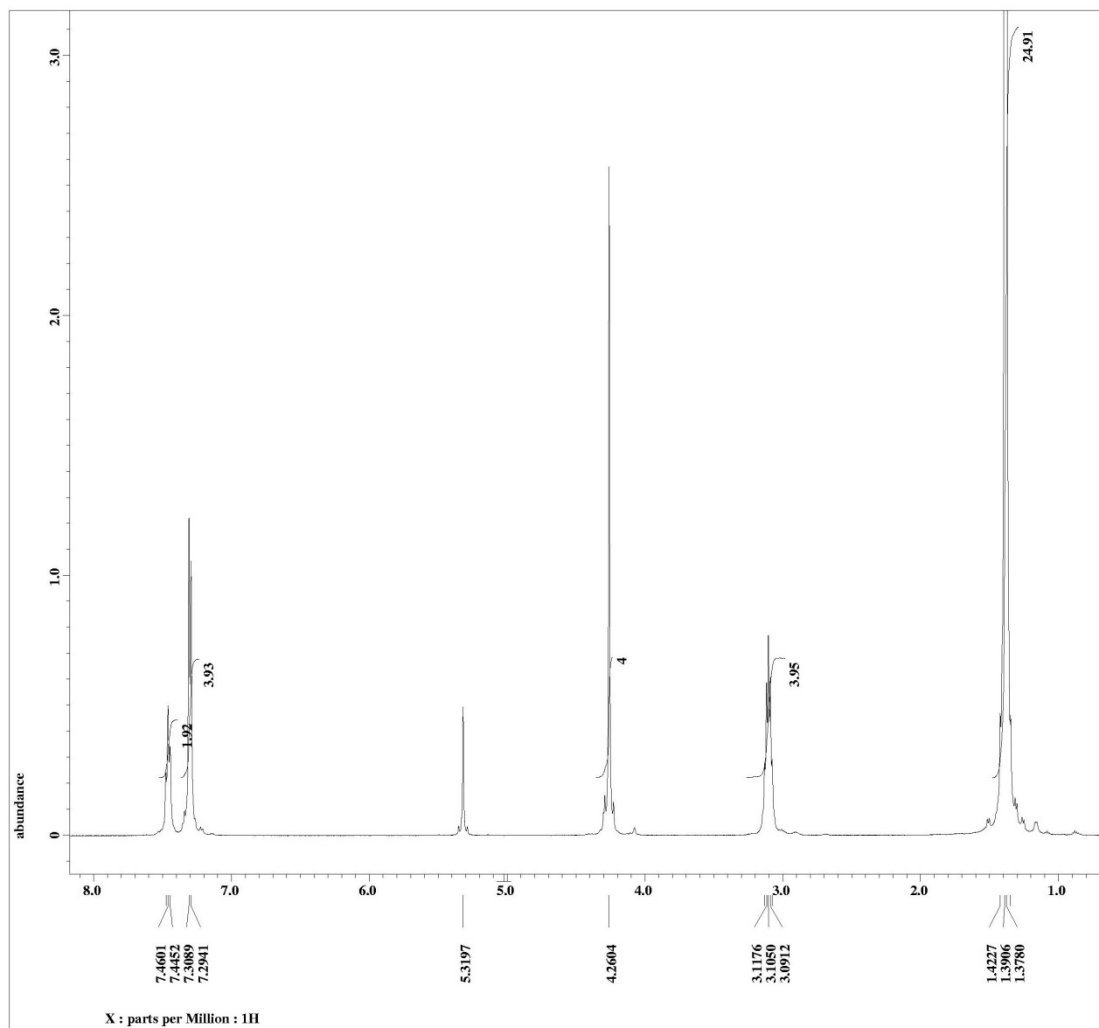

**Figure S11.**  $^{13}\text{C}\{^1\text{H}\}$  NMR spectrum of  $[(\text{SIPr})\text{Au}-\text{Fe}(\text{CO})_5][\text{SbF}_6]$  (**5**) (125.77 MHz) in  $\text{CD}_2\text{Cl}_2$

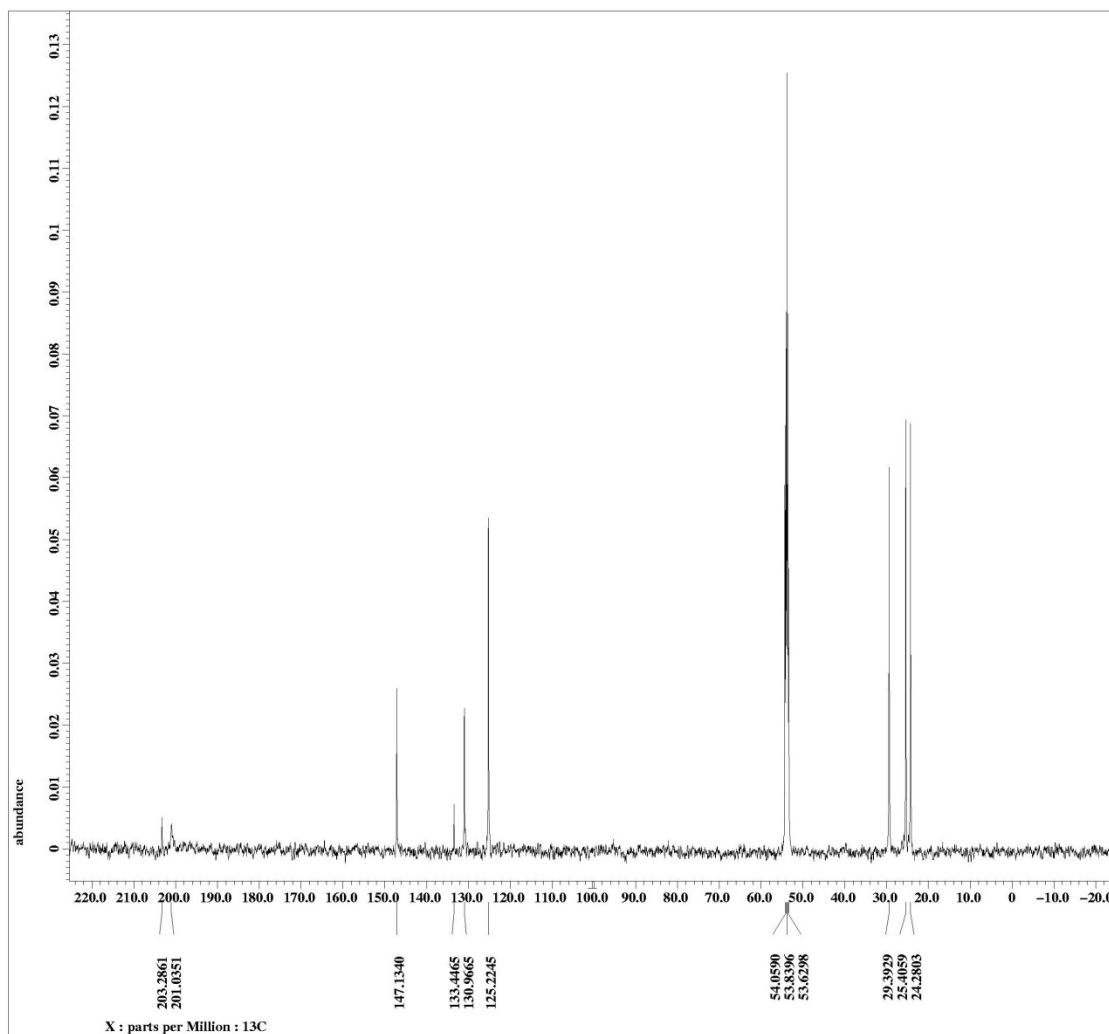

**Figure S12.** FT-IR spectrum (crystals on ATR, resolution,  $2\text{ cm}^{-1}$ ) of  $[(\text{SIPr})\text{Au}-\text{Fe}(\text{CO})_5][\text{SbF}_6]$  (**5**)

SHIMADZ

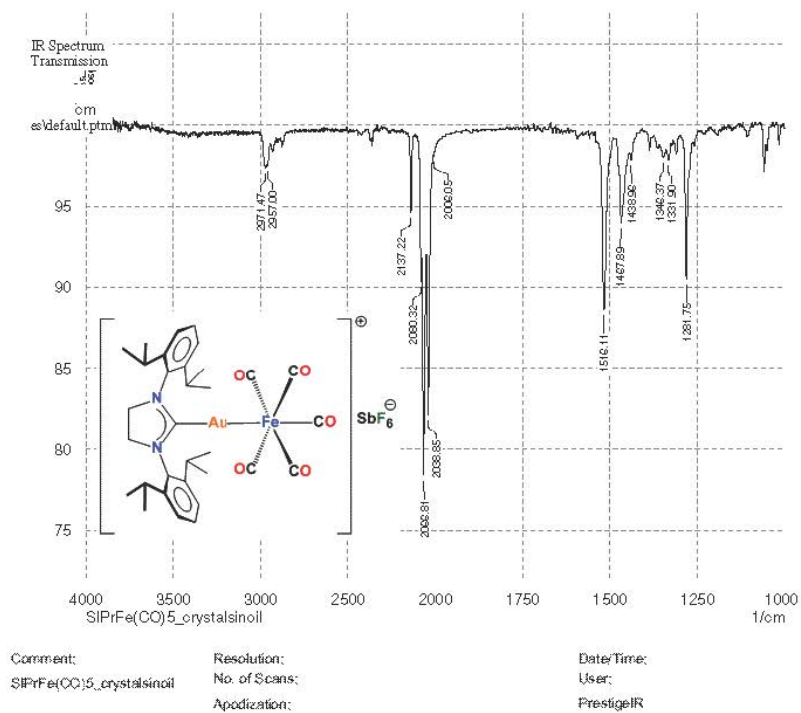

**Figure S13.**  $^1\text{H}$  NMR spectrum of  $[(^{12}\text{C})\text{CAAC})\text{Au-Fe}(\text{CO})_5][\text{SbF}_6]$  (**6**) (500.16 MHz) in  $\text{CD}_2\text{Cl}_2$

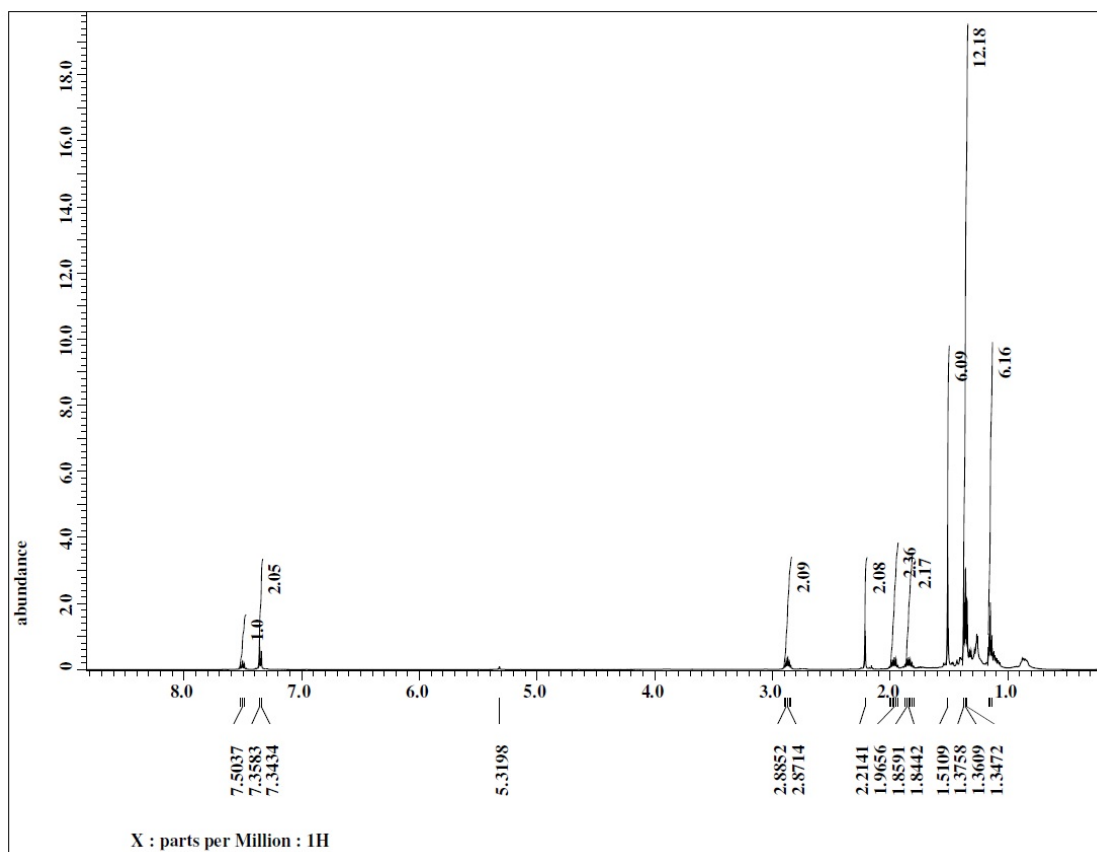

**Figure S14.**  $^{13}\text{C}\{^1\text{H}\}$  NMR spectrum of  $[(^{\text{Et}}\text{CAAC})\text{Au}-\text{Fe}(\text{CO})_5][\text{SbF}_6]$  (**6**) (125.77 MHz) in  $\text{CD}_2\text{Cl}_2$  and insert showing CO and carbene-C peaks.

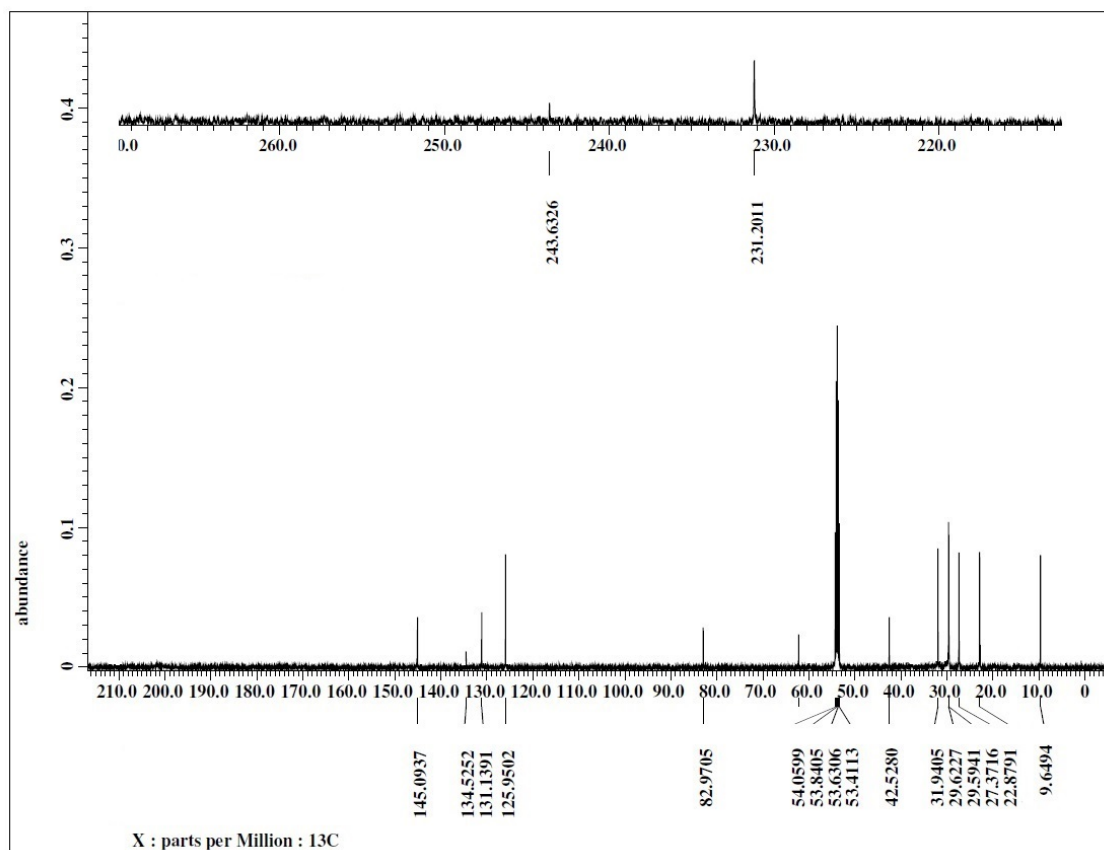

**Figure S15.** FT-IR spectrum (crystals on ATR, resolution,  $2\text{ cm}^{-1}$ ) of  $[(\text{Et}^2\text{CAAC})\text{Au}-\text{Fe}(\text{CO})_5][\text{SbF}_6]$  (**6**)

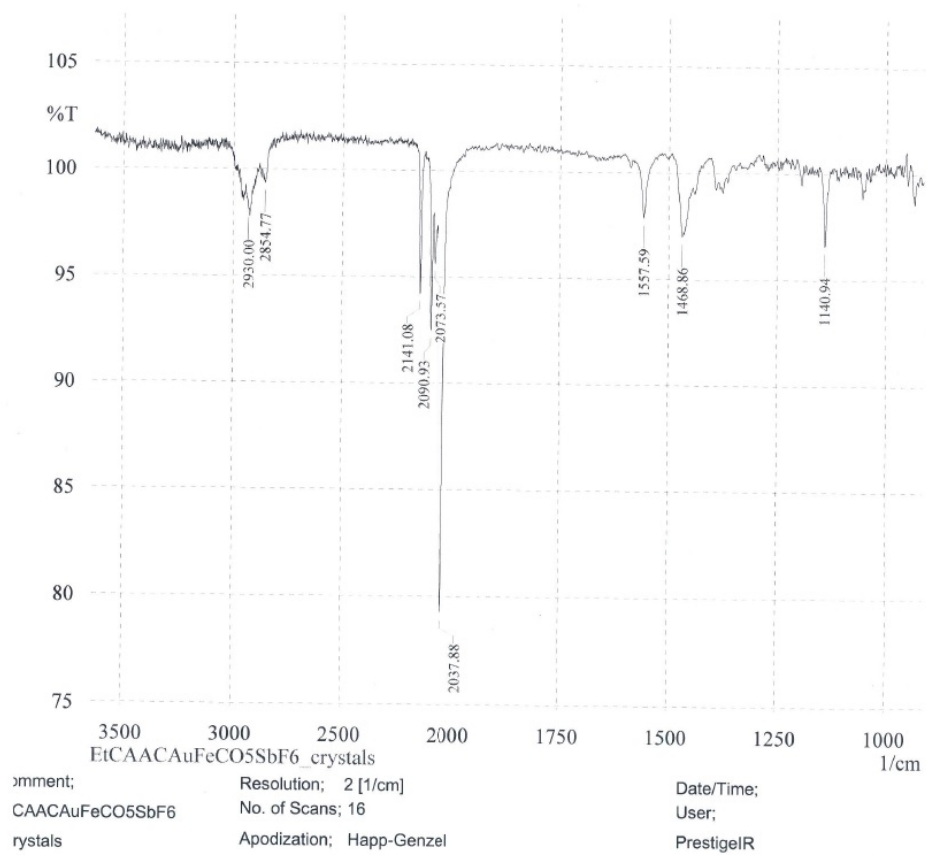

**Figure S16.**  $^1\text{H}$  NMR spectrum of  $(\text{SIPr})\text{Au-Mn}(\text{CO})_5$  (**7**) (500.16 MHz) in  $\text{DMSO-}d_6$

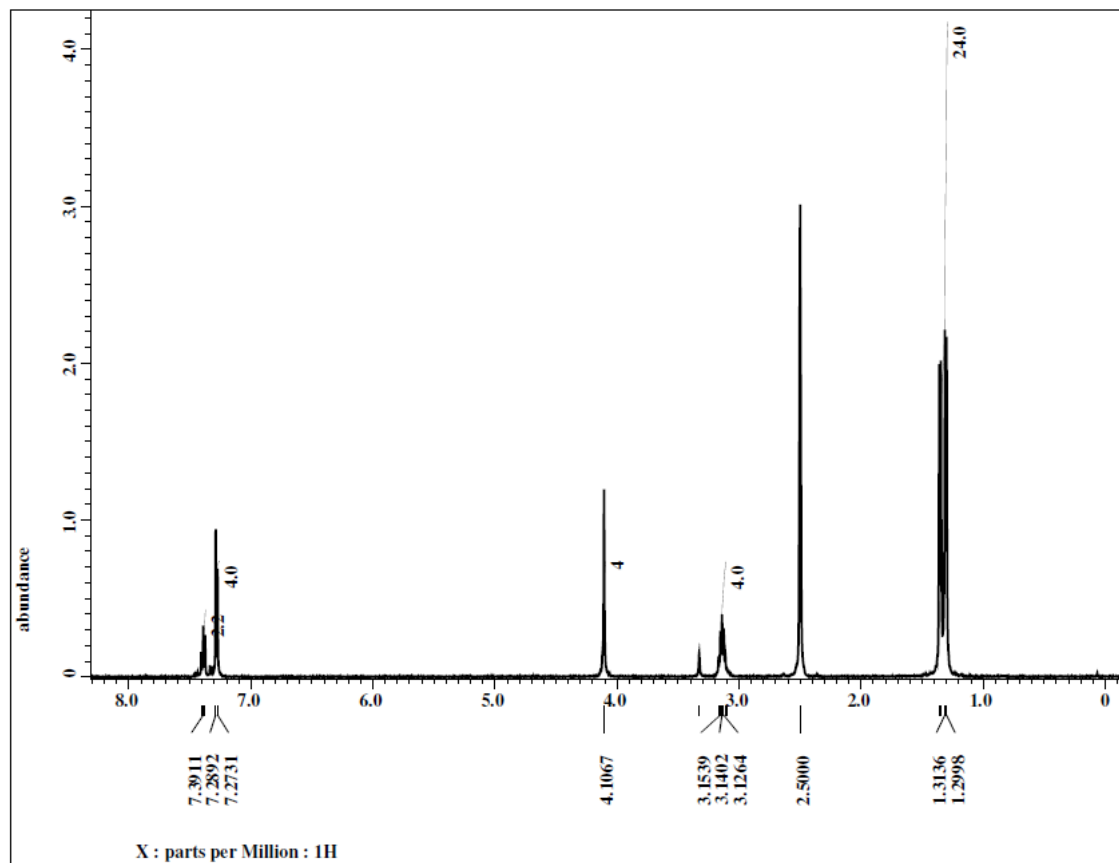



**Figure S17.**  $^{13}\text{C}\{^1\text{H}\}$  NMR spectrum of (SIPr)Au-Mn(CO)<sub>5</sub> (**7**) (125.77 MHz) in DMSO-*d*<sub>6</sub> and insert showing CO and carbene-C peaks.

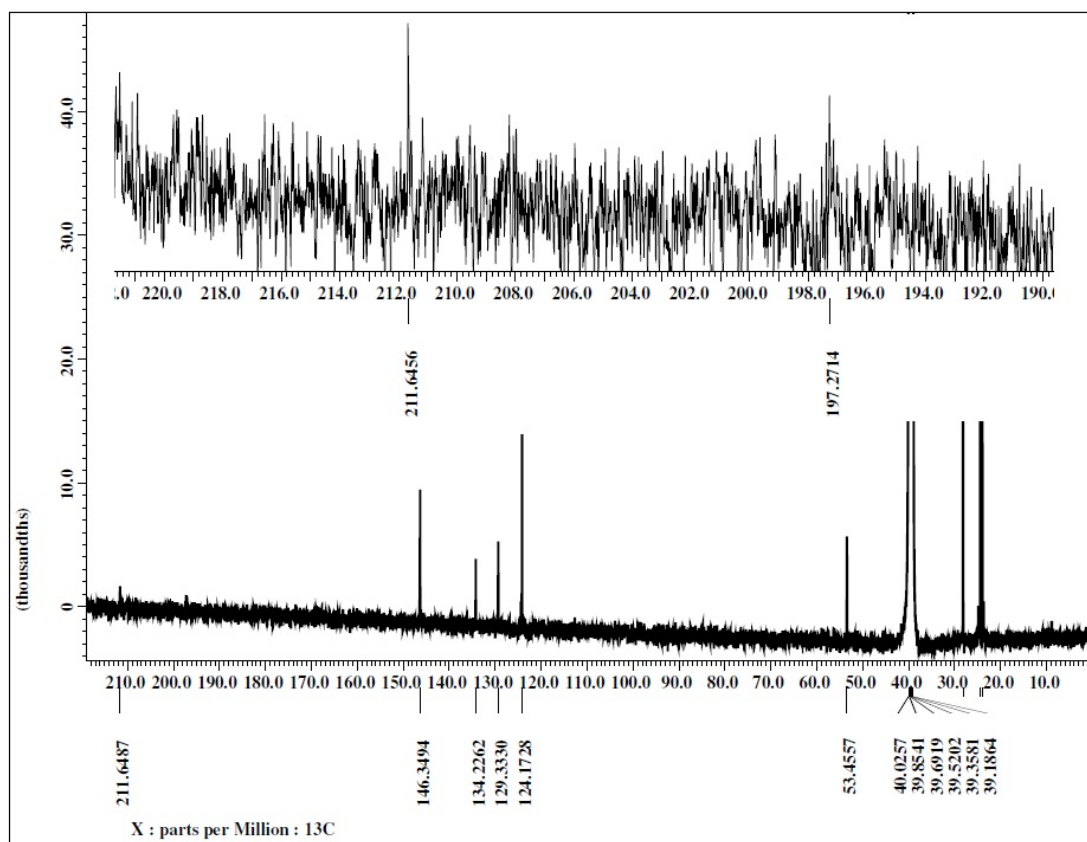

**Figure S18.** FT-IR spectrum (crystals on ATR, resolution, 2  $\text{cm}^{-1}$ ) of (SIPr)Au-Mn(CO)<sub>5</sub> (7)

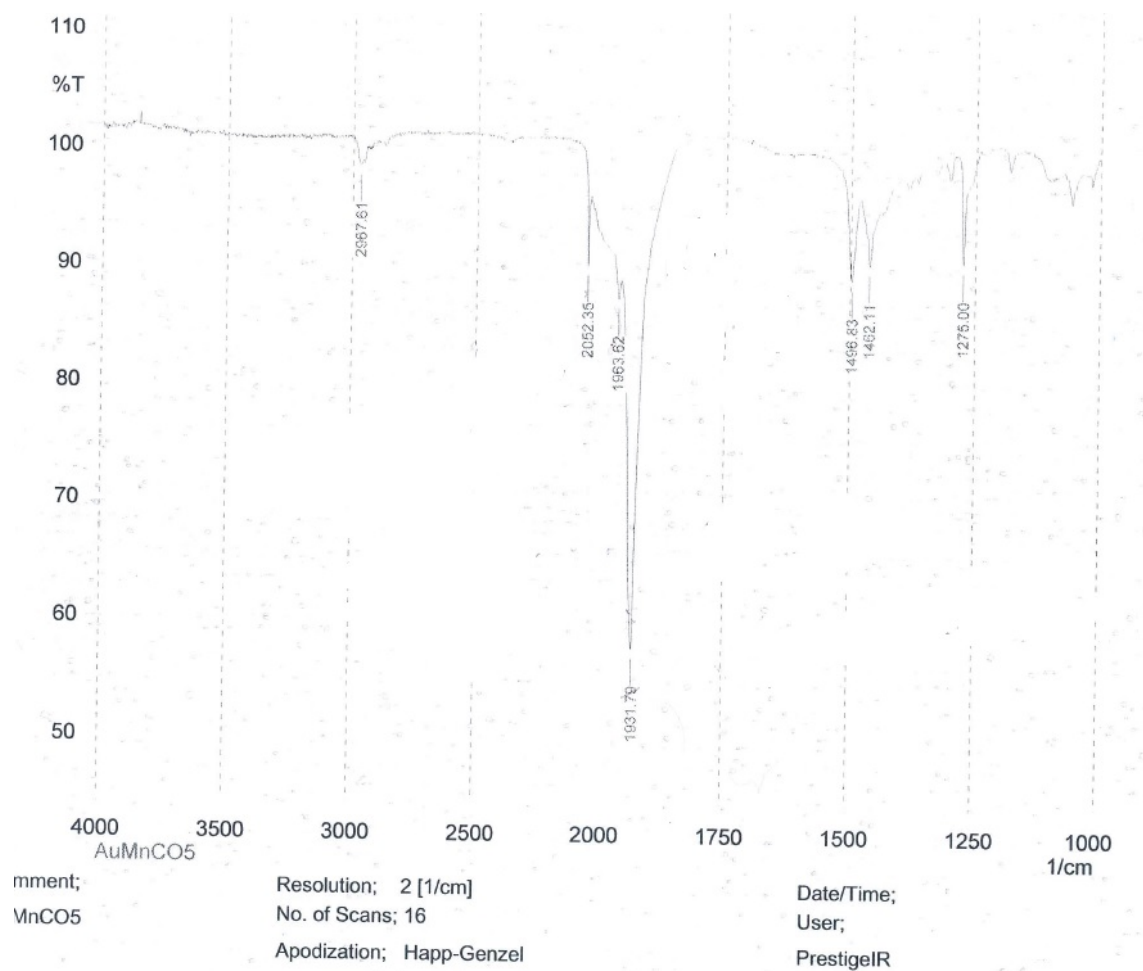

**Figure S19.**  $^1\text{H}$  NMR spectrum of  $\text{Mes}_3\text{PAu-Mn}(\text{CO})_5$  (**8**) (500.16 MHz) in  $\text{CD}_2\text{Cl}_2$

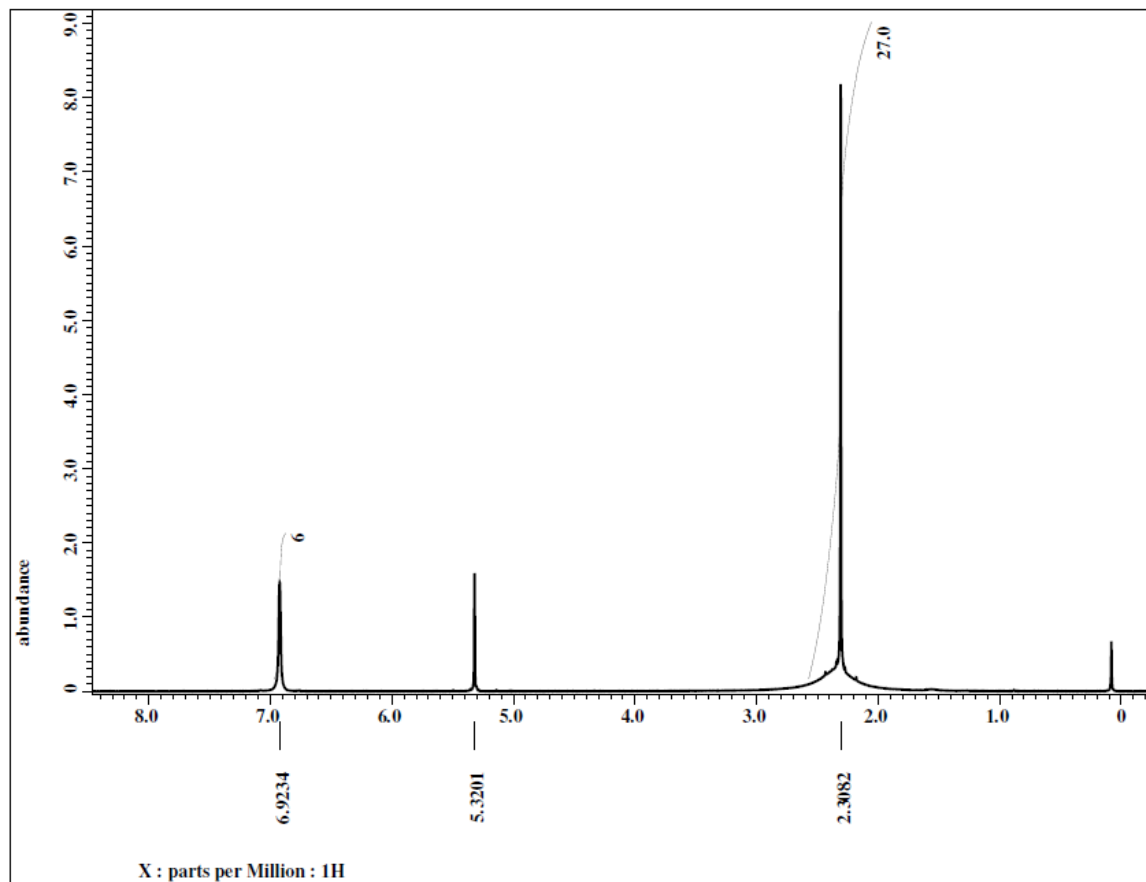

**Figure S20.**  $^{13}\text{C}\{^1\text{H}\}$  NMR spectrum of  $\text{Mes}_3\text{PAu-Mn}(\text{CO})_5$  (**8**) (125.77 MHz) in  $\text{CD}_2\text{Cl}_2$

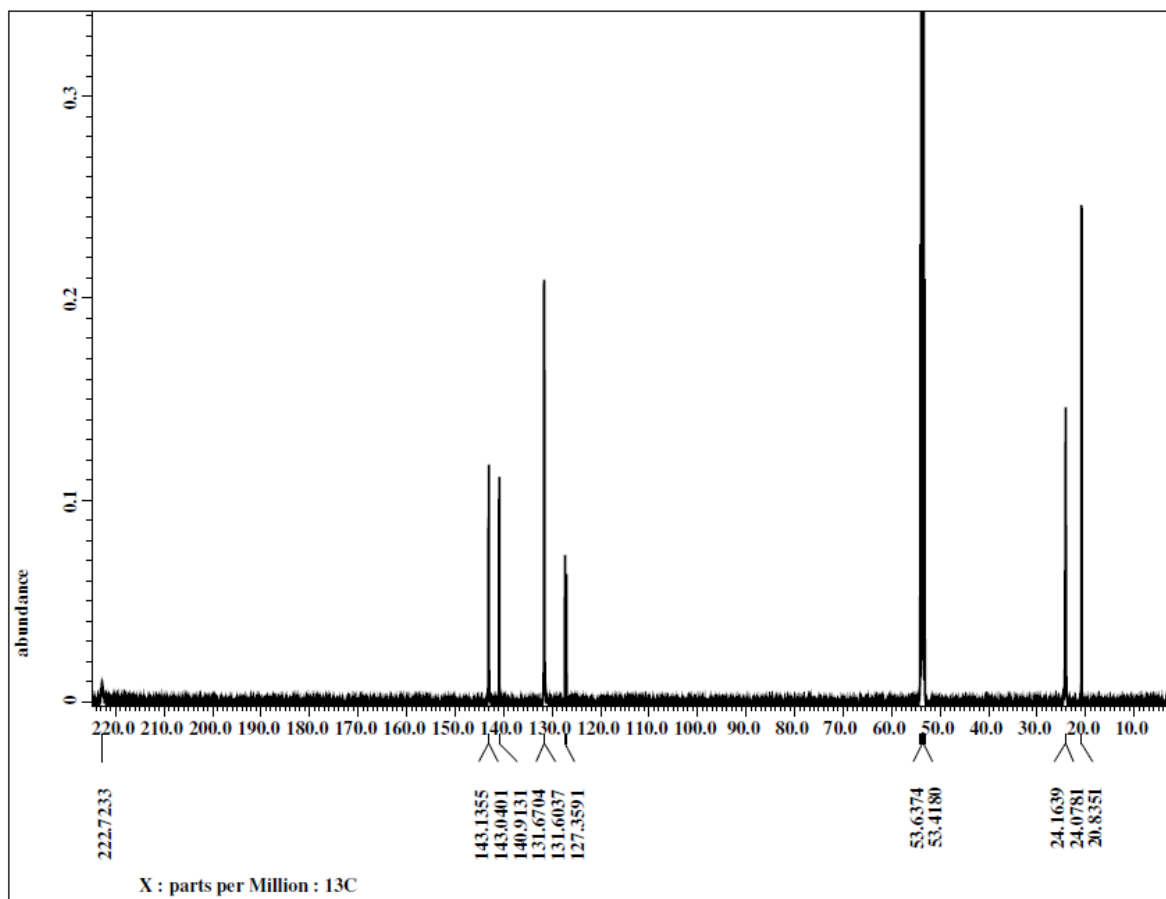

**Figure S21.**  $^{31}\text{P}\{^1\text{H}\}$  NMR spectrum of  $\text{Mes}_3\text{PAu-Mn}(\text{CO})_5$  (**8**) (121.65 MHz) in  $\text{CD}_2\text{Cl}_2$

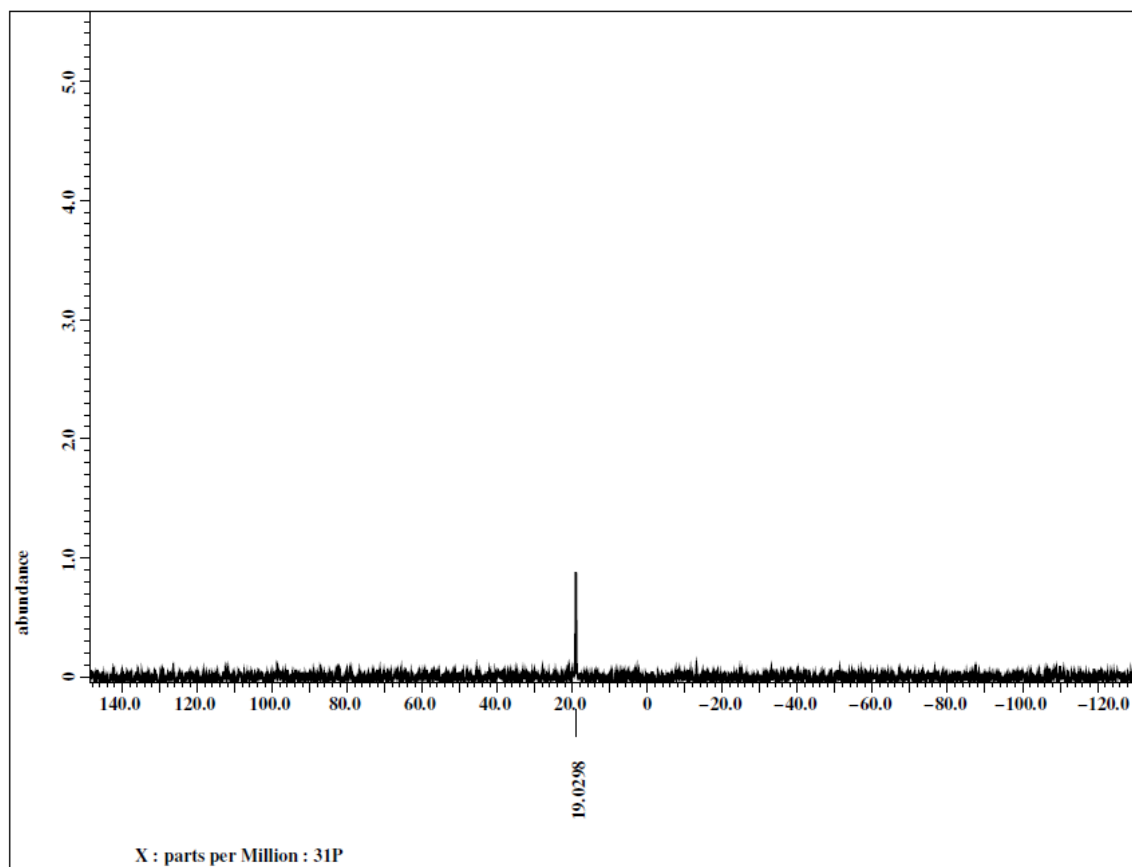

**Figure S22.** FT-IR spectrum (crystals on ATR, resolution, 2 cm<sup>-1</sup>) of Mes<sub>3</sub>PAu-Mn(CO)<sub>5</sub> (**8**)

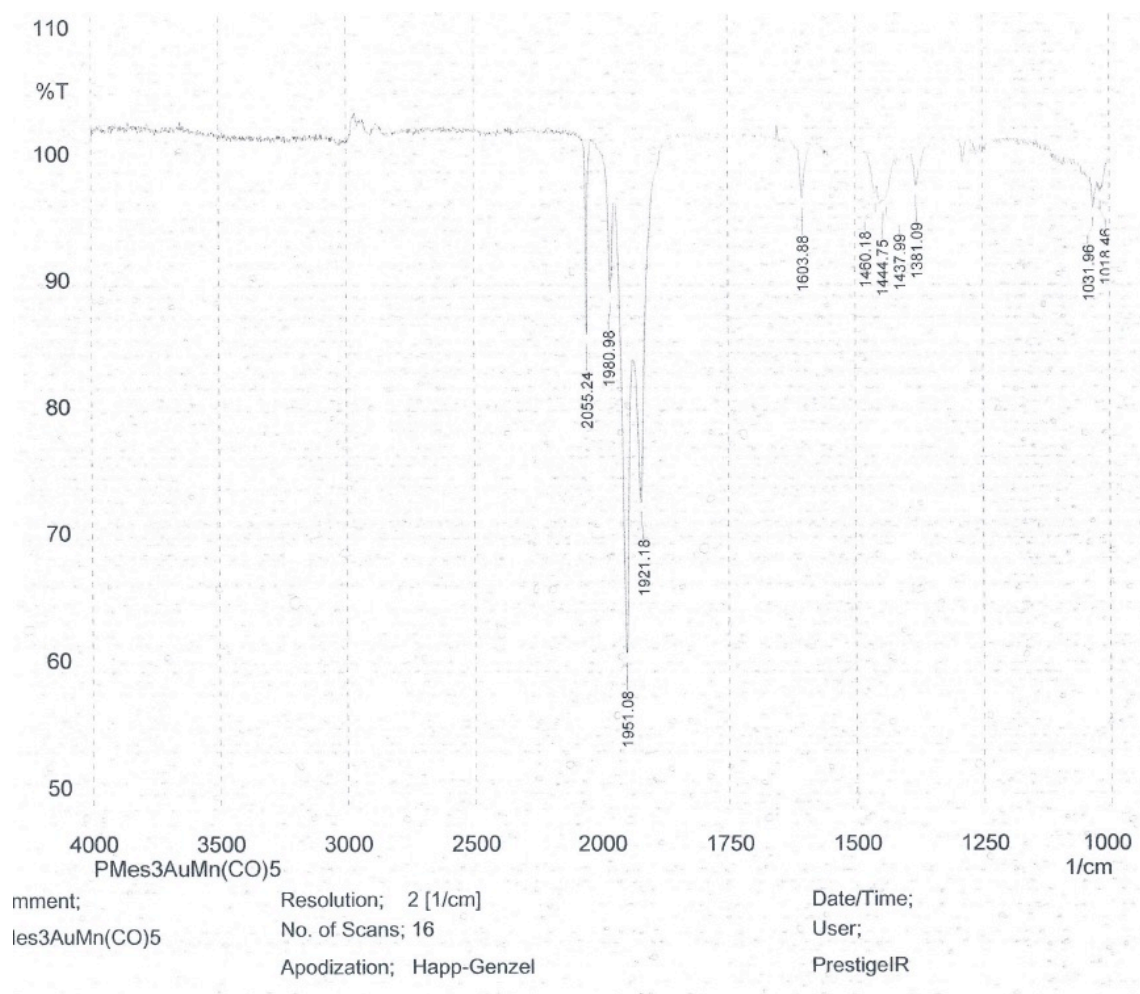

**Figure S23.**  $^1\text{H}$  NMR spectrum of  $(\text{SIPr})\text{Ag-Mn}(\text{CO})_5$  (**9**) (500.16 MHz) in  $\text{CD}_2\text{Cl}_2$

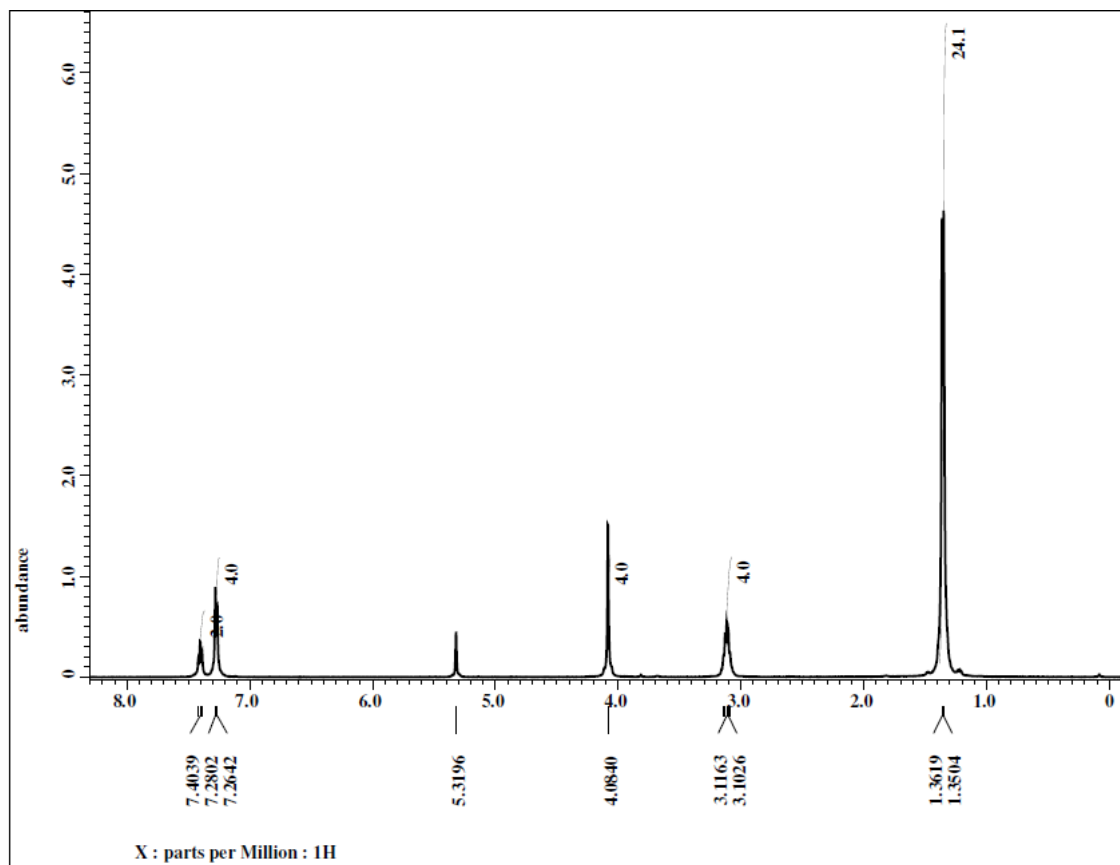

**Figure S24.**  $^{13}\text{C}\{^1\text{H}\}$  NMR spectrum of (SIPr)Ag-Mn(CO)<sub>5</sub> (**9**) (125.77 MHz) in CD<sub>2</sub>Cl<sub>2</sub> and insert showing CO and carbene-C peaks.

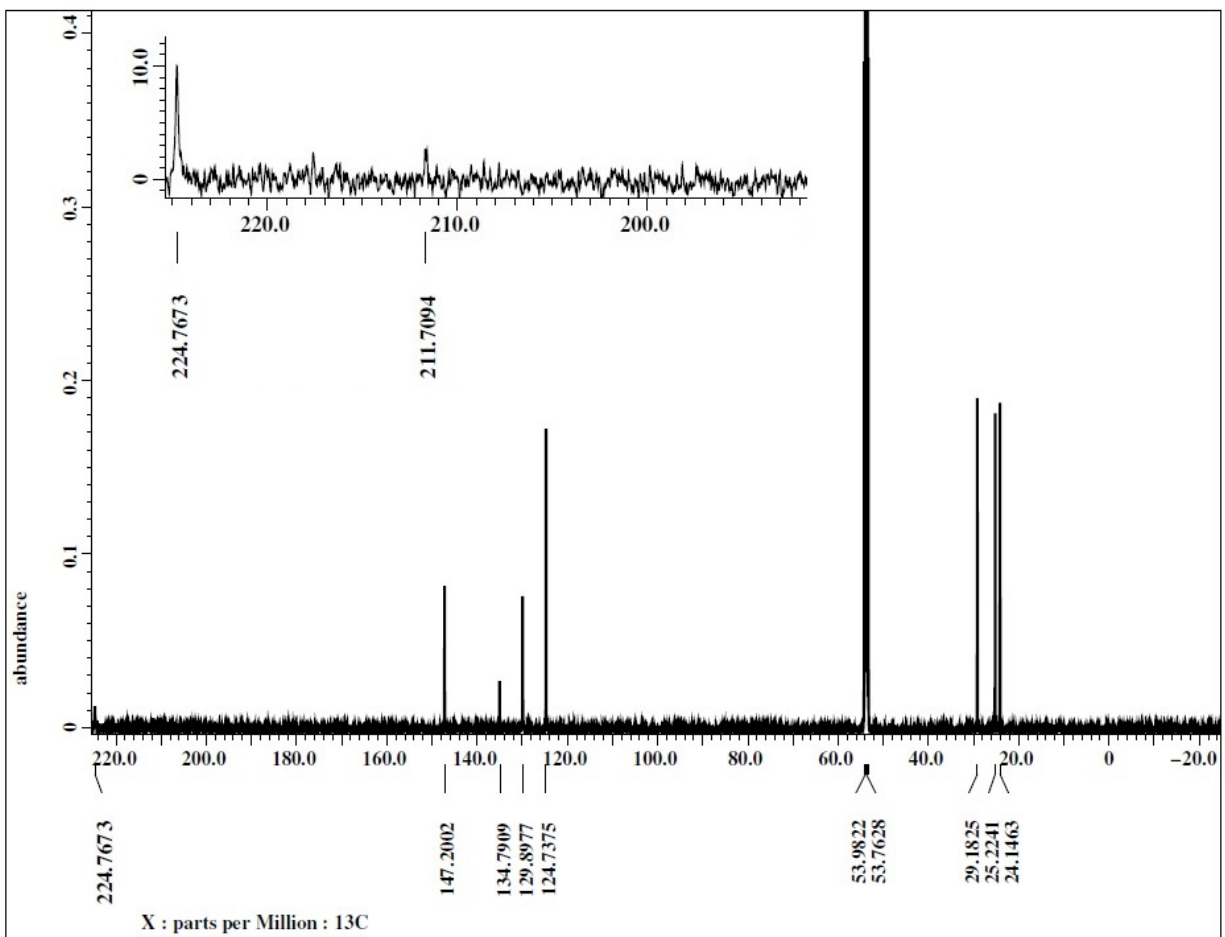



**Figure S25.** FT-IR spectrum (crystals on ATR, resolution, 2 cm<sup>-1</sup>) of (SIPr)Ag-Mn(CO)<sub>5</sub> (**9**)

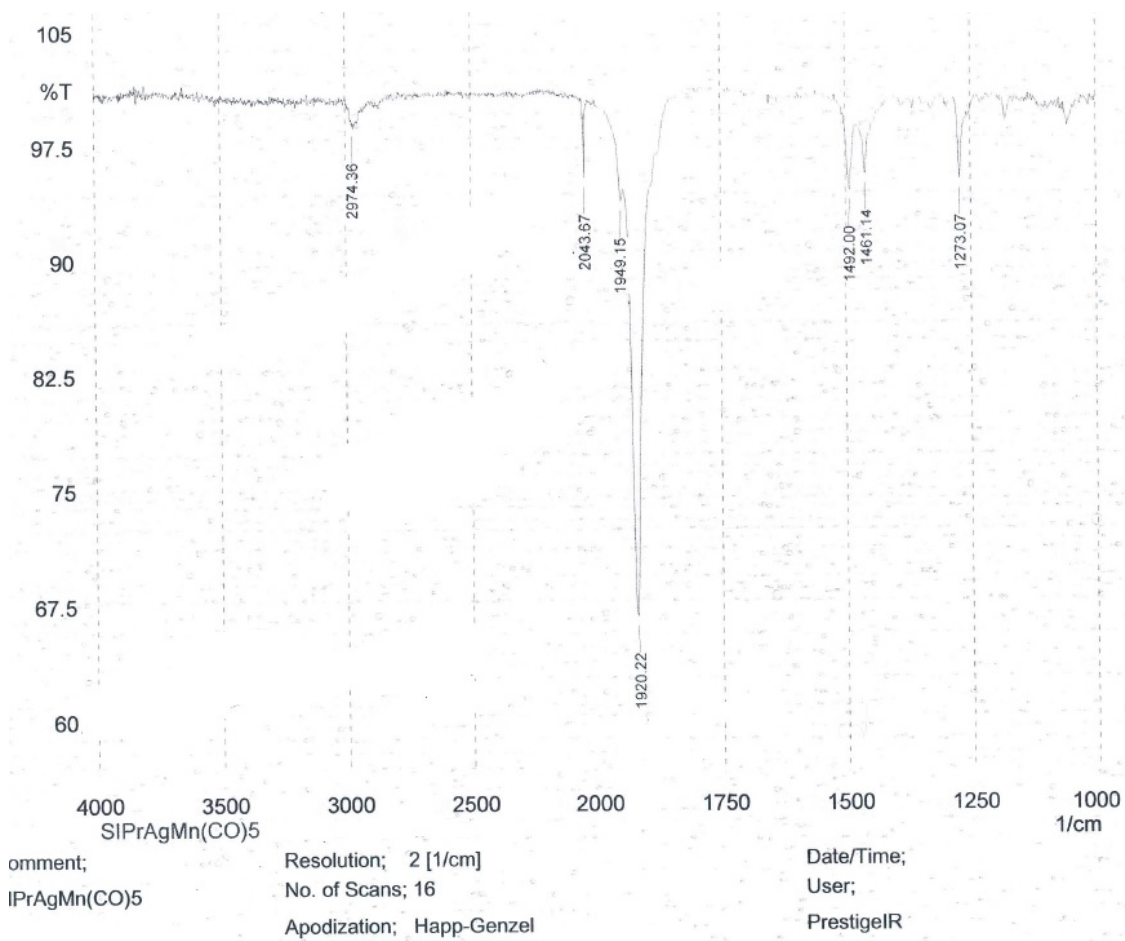

**Figure S26.**  $^1\text{H}$  NMR spectrum of  $(\text{IPr}^*)\text{AuNCFe}(\text{CO})_4$  (**10**) (500.16 MHz) in  $\text{CD}_2\text{Cl}_2$

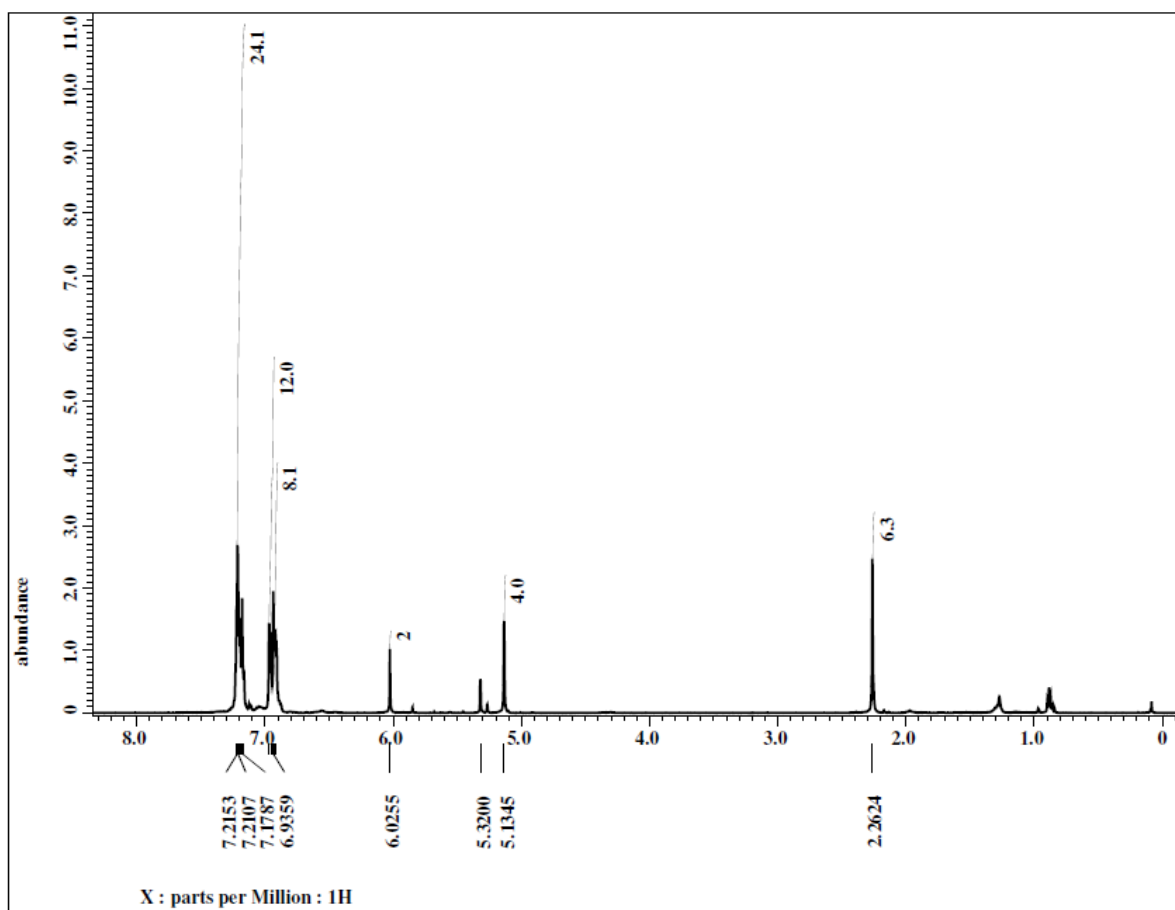

**Figure S27.**  $^{13}\text{C}\{^1\text{H}\}$  NMR spectrum of  $(\text{IPr}^*)\text{AuNCFe}(\text{CO})_4$  (**10**) (125.77 MHz) in  $\text{CD}_2\text{Cl}_2$  and insert showing CO and carbene-C peaks.

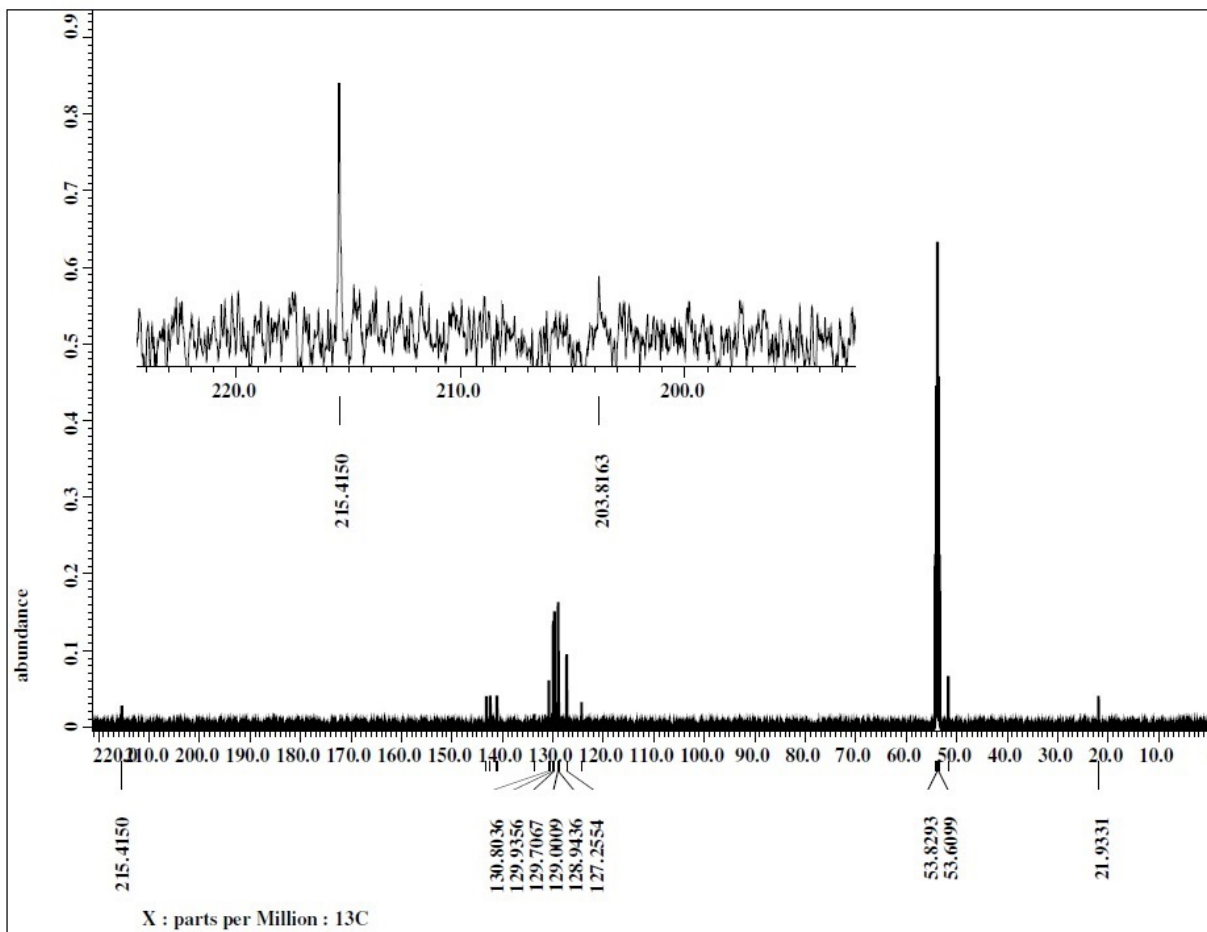

**Figure S28.** FT-IR spectrum (crystals on ATR, resolution, 2 cm<sup>-1</sup>) of (IPr\*)AuNCFe(CO)<sub>4</sub> (**10**)

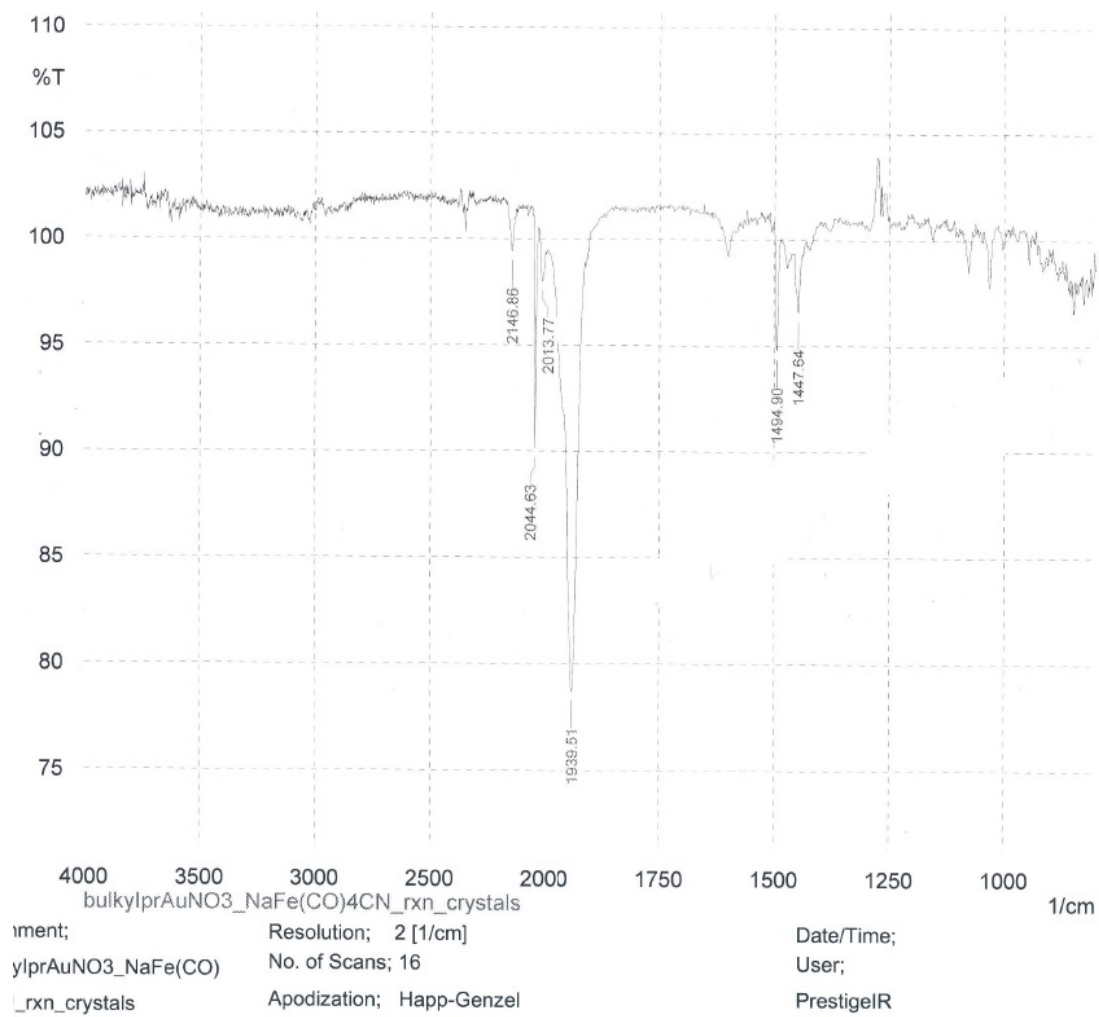

**Figure S29.**  $^1\text{H}$  NMR spectrum of  $(\text{SIPr})\text{AgNCFe}(\text{CO})_4$  (**11**) (500.16 MHz) in  $\text{CD}_2\text{Cl}_2$

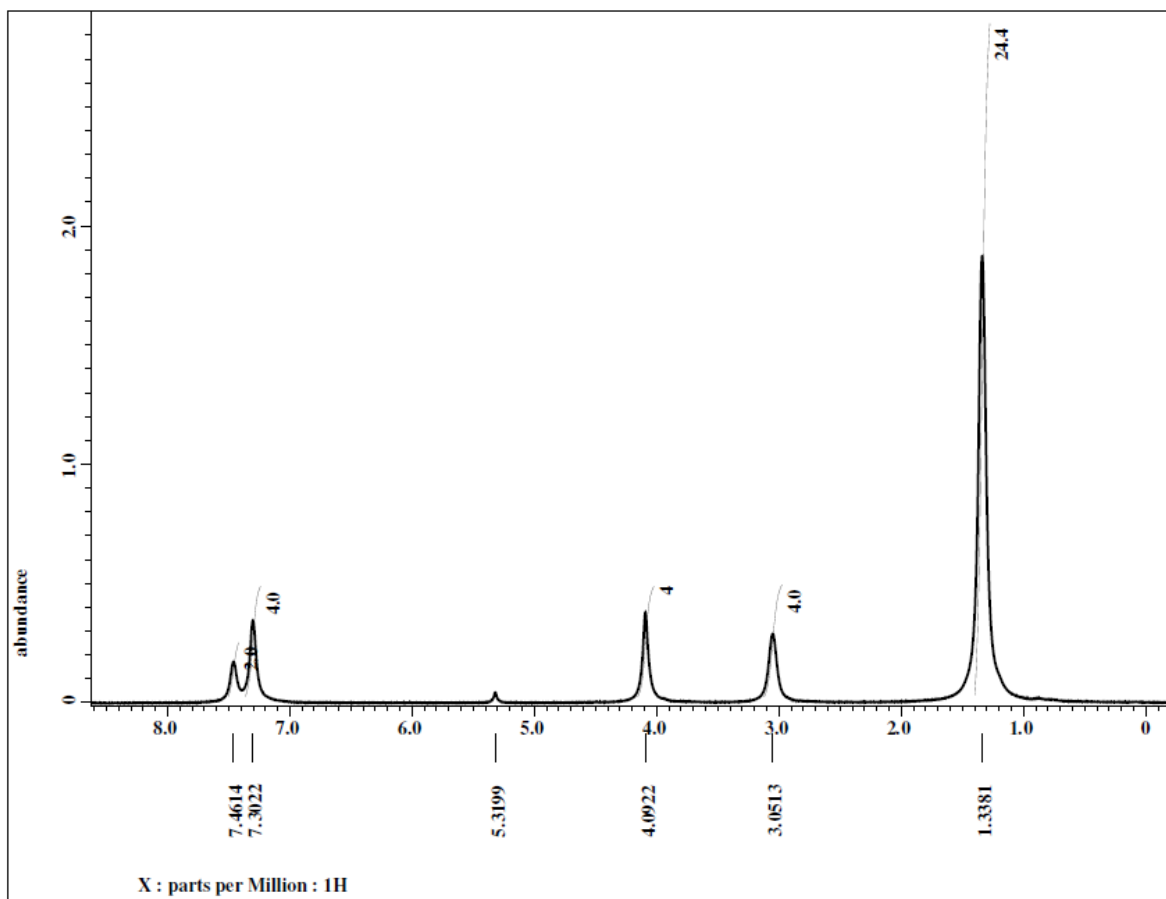

**Figure S30.**  $^{13}\text{C}\{^1\text{H}\}$  NMR spectrum of  $(\text{SIPr})\text{AgNCFe}(\text{CO})_4$  (**11**) (125.77 MHz) in  $\text{CD}_2\text{Cl}_2$  and insert showing CO and carbene-C peaks.

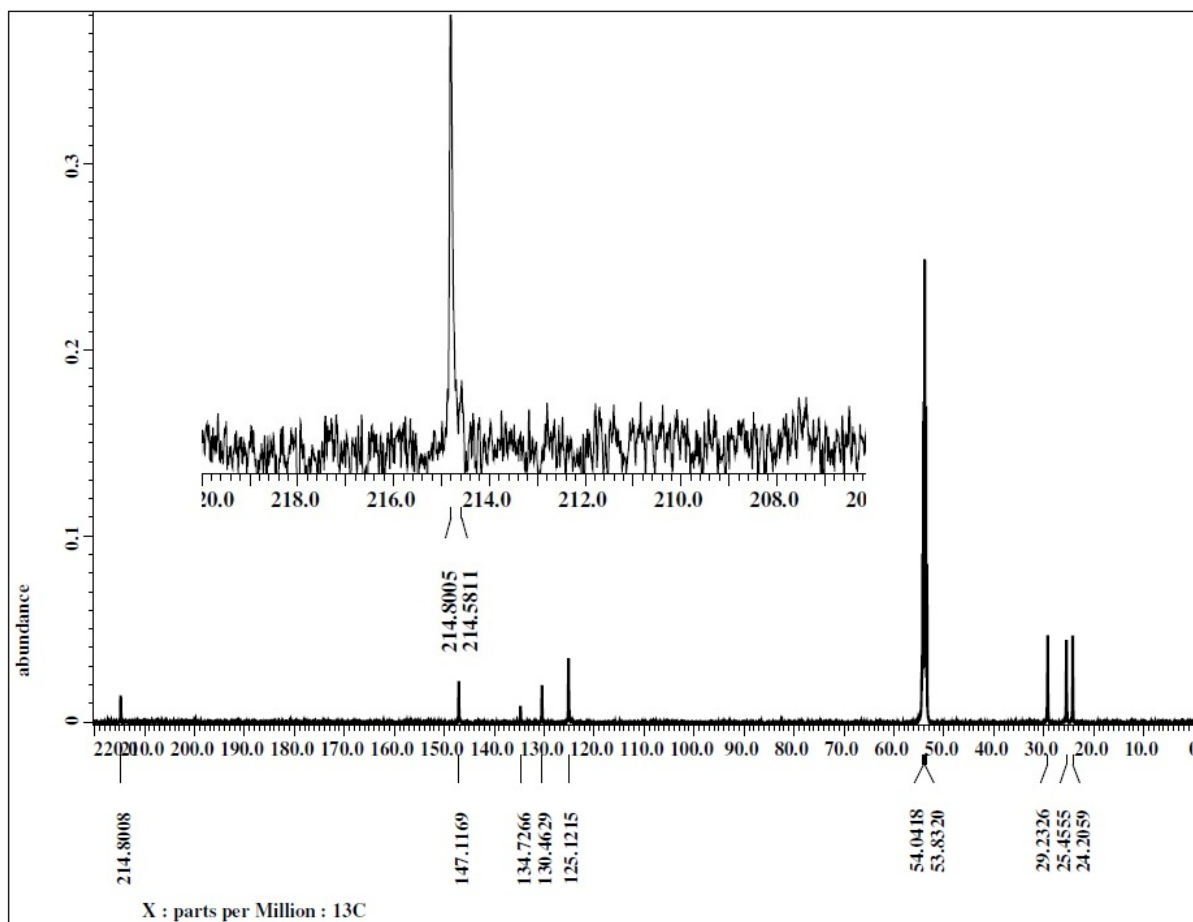

**Figure S31.** FT-IR spectrum (crystals on ATR, resolution, 2 cm<sup>-1</sup>) of (SIPr)AgNCF<sub>4</sub>(CO)<sub>4</sub> (**11**)

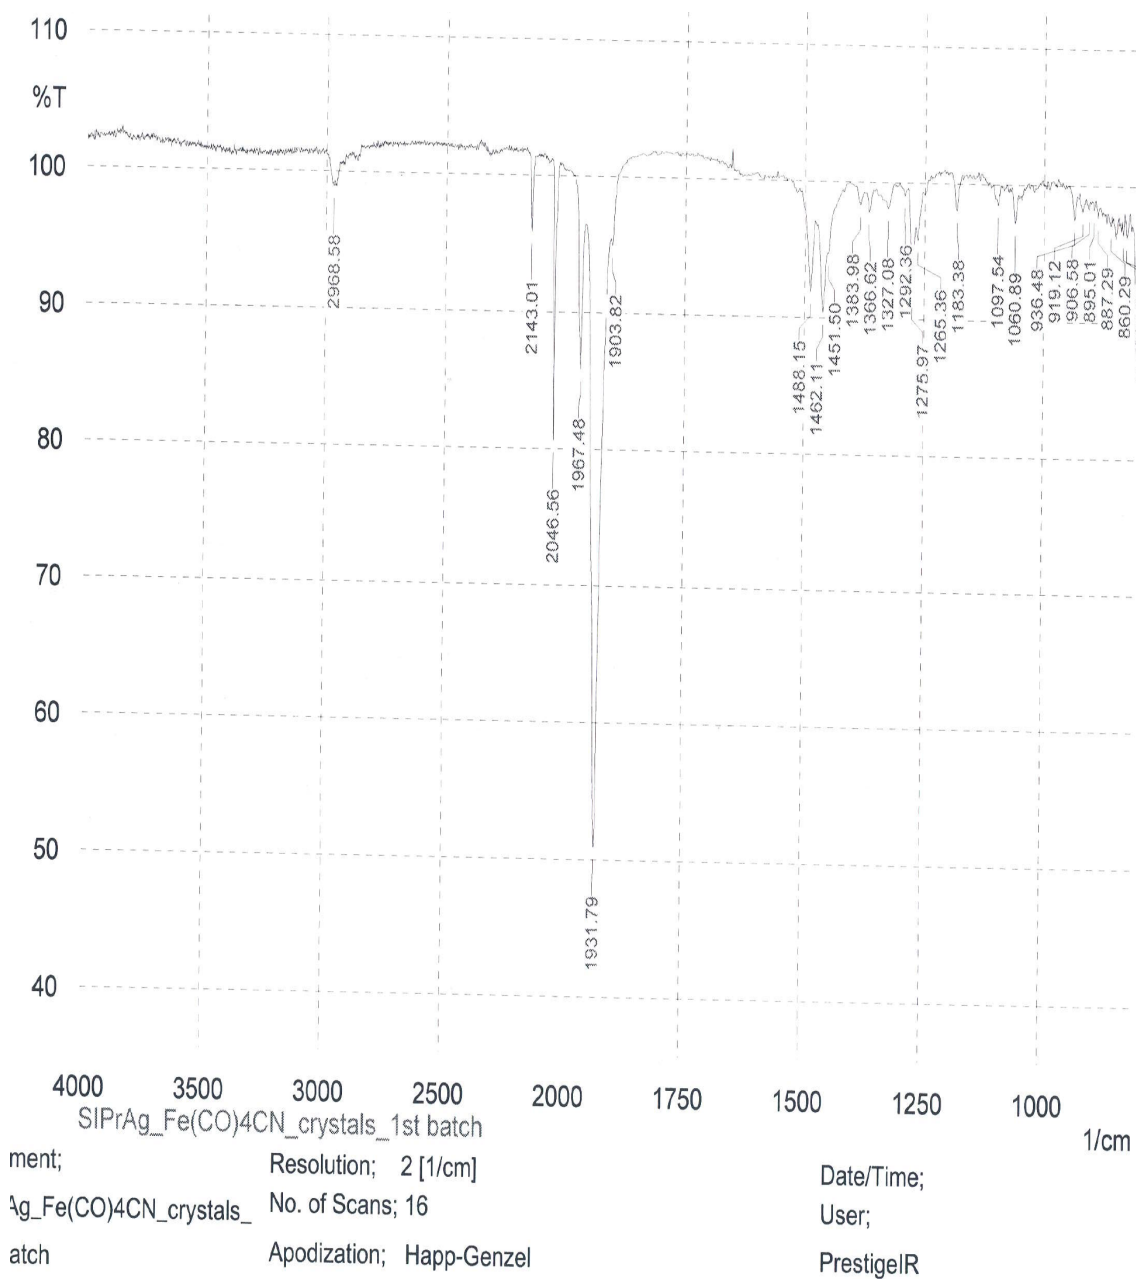

**Figure S32.**  $^1\text{H}$  NMR spectrum of  $(\text{SIPr})\text{CuNCFe}(\text{CO})_4$  (**12**) (500.16 MHz) in  $\text{CD}_2\text{Cl}_2$

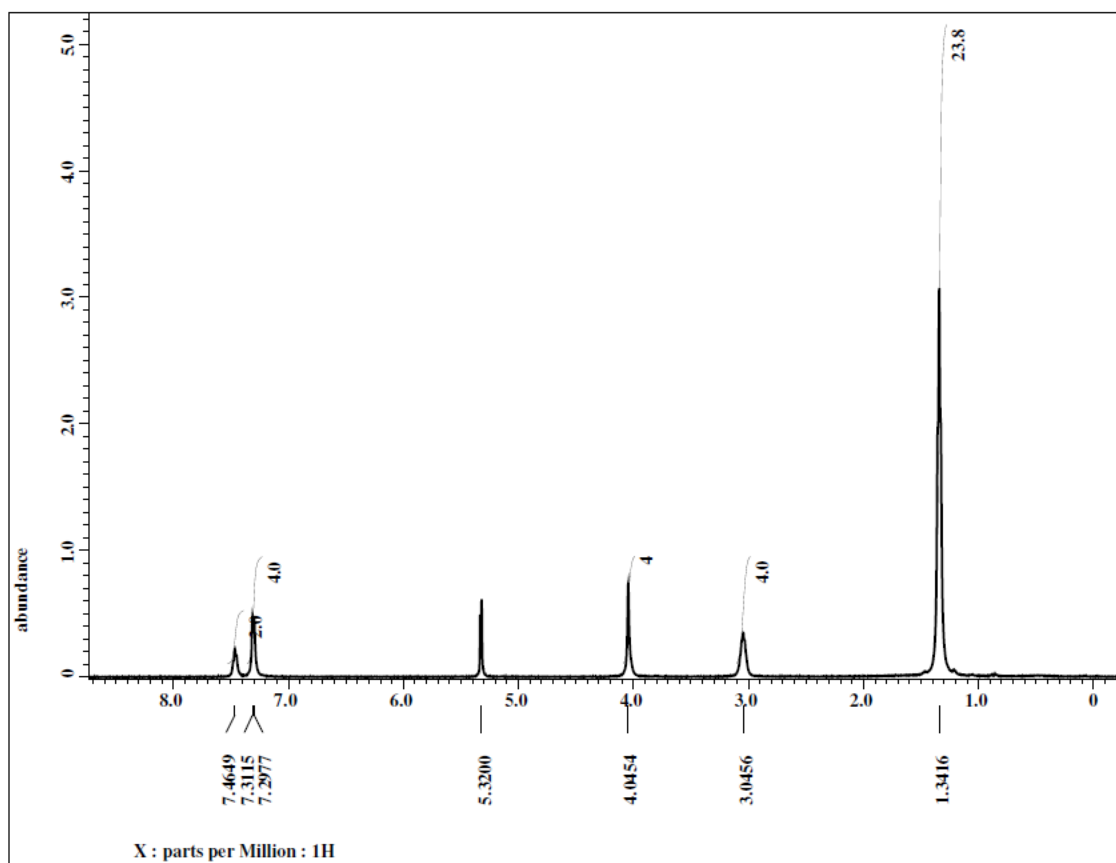



**Figure S33.**  $^{13}\text{C}\{^1\text{H}\}$  NMR spectrum of  $(\text{SIPr})\text{CuNCFe}(\text{CO})_4$  (**12**) (125.77 MHz) in  $\text{CD}_2\text{Cl}_2$  and insert showing CO and carbene-C peaks.

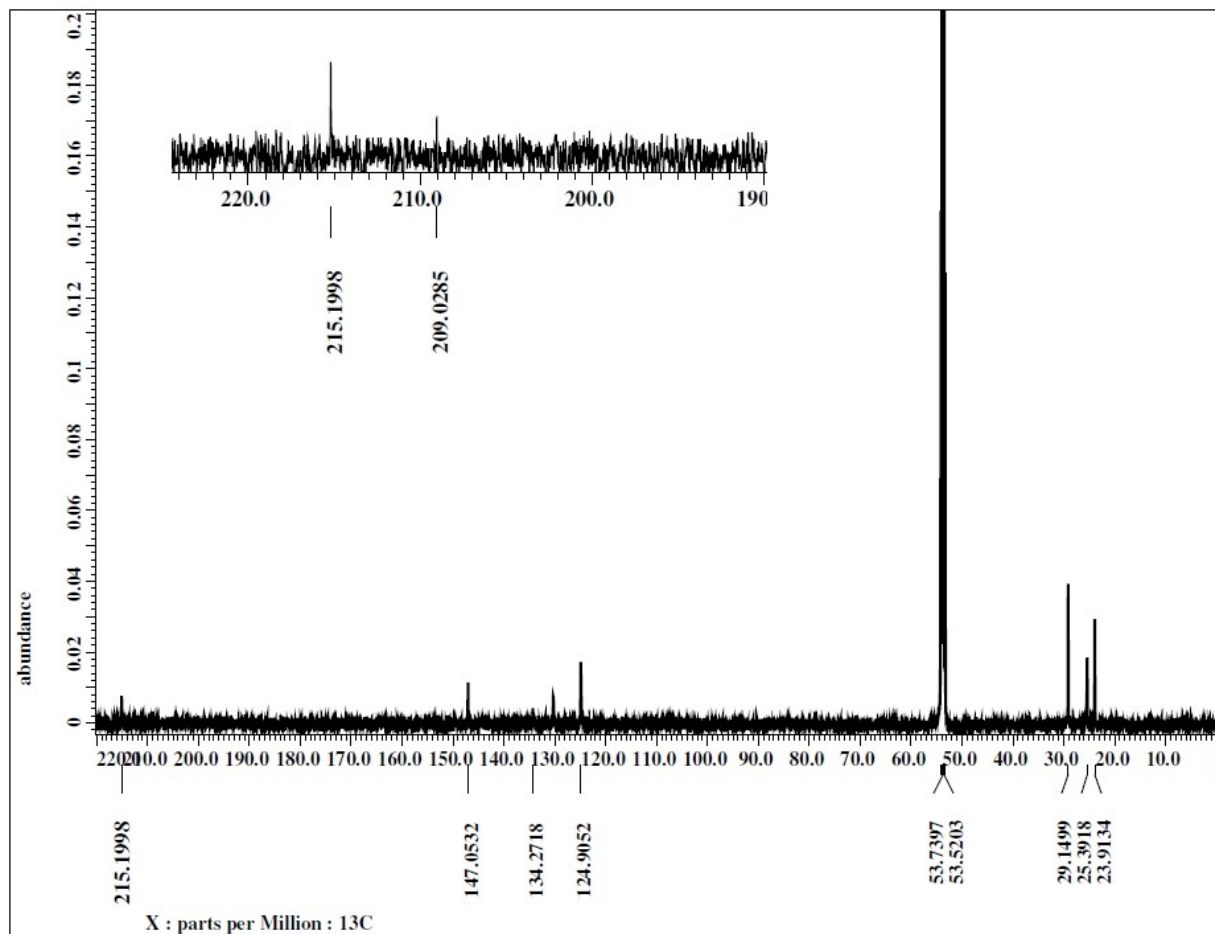

**Figure S34.** FT-IR spectrum (crystals on ATR, resolution, 2 cm<sup>-1</sup>) of (SIPr)CuNCF<sub>3</sub>(CO)<sub>4</sub> (**12**)

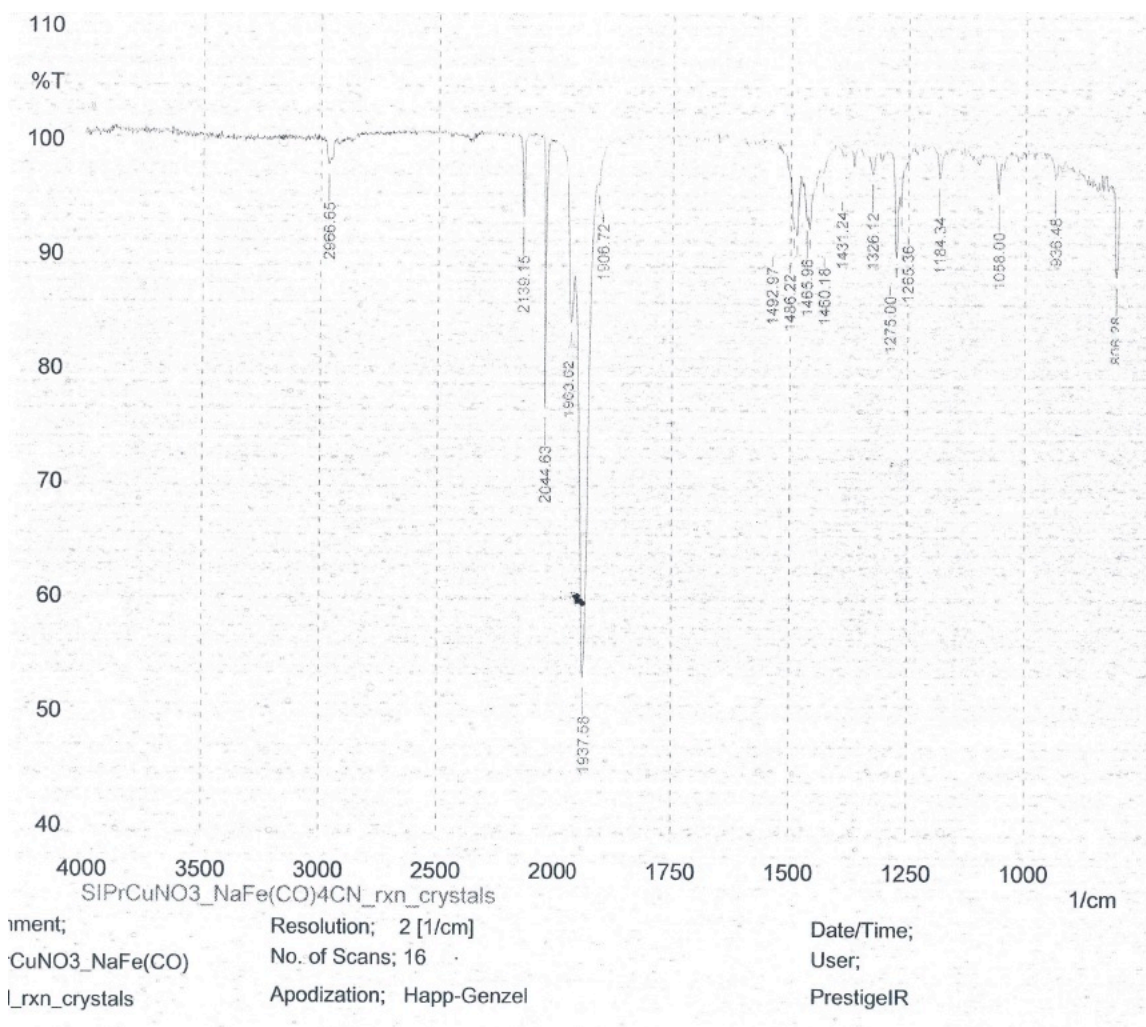

**Figure S35.** Molecular structure and atom numbering scheme for  $[(\text{SIPr})\text{Au}-\text{Fe}(\text{CO})_5][\text{SbF}_6]$  (**5**).

Hydrogen atoms have been omitted for clarity.

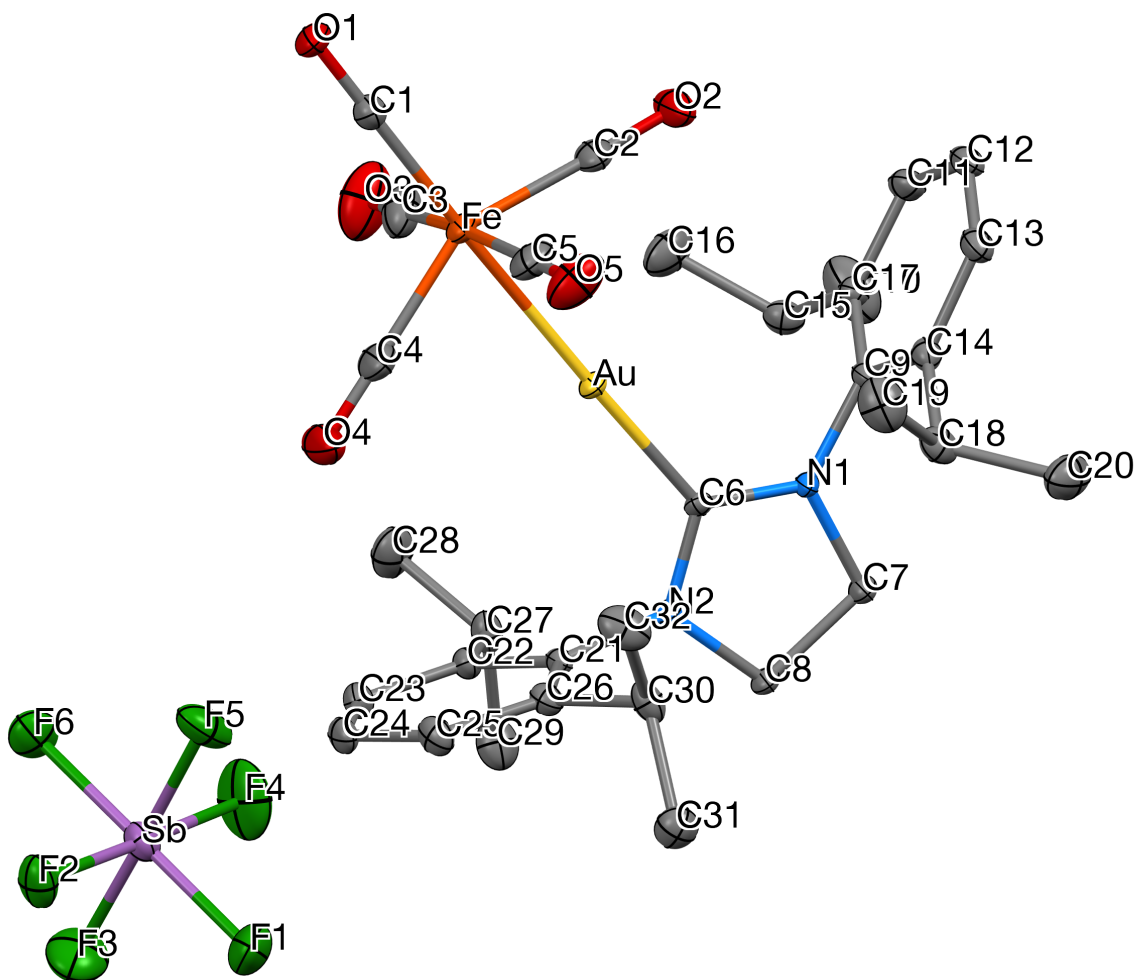

**Table S5.** Crystal data and structure refinement for  $[(\text{SIPr})\text{Au}-\text{Fe}(\text{CO})_5][\text{SbF}_6]$  (**5**).

|                     |                                                                         |
|---------------------|-------------------------------------------------------------------------|
| Identification code | RAD560                                                                  |
| Empirical formula   | $\text{C}_{32}\text{H}_{38}\text{AuF}_6\text{FeN}_2\text{O}_5\text{Sb}$ |
| Formula weight      | 1019.21                                                                 |
| Temperature/K       | 100.0                                                                   |
| Crystal system      | monoclinic                                                              |
| Space group         | $P2_1/n$                                                                |
| $a/\text{\AA}$      | 12.4358(9)                                                              |
| $b/\text{\AA}$      | 18.8623(14)                                                             |
| $c/\text{\AA}$      | 15.7372(11)                                                             |
| $\alpha/^\circ$     | 90                                                                      |
| $\beta/^\circ$      | 89.999(2)                                                               |

|                                                |                                                                |
|------------------------------------------------|----------------------------------------------------------------|
| $\gamma/^\circ$                                | 90                                                             |
| Volume/ $\text{\AA}^3$                         | 3691.4(5)                                                      |
| Z                                              | 4                                                              |
| $\rho_{\text{calc}}/\text{g/cm}^3$             | 1.834                                                          |
| $\mu/\text{mm}^{-1}$                           | 5.148                                                          |
| F(000)                                         | 1976.0                                                         |
| Crystal size/ $\text{mm}^3$                    | $0.22 \times 0.2 \times 0.16$                                  |
| Radiation                                      | MoK $\alpha$ ( $\lambda = 0.71073$ )                           |
| 2 $\Theta$ range for data collection/ $^\circ$ | 5.61 to 63.012                                                 |
| Index ranges                                   | $-18 \leq h \leq 18, -27 \leq k \leq 27, -23 \leq l \leq 23$   |
| Reflections collected                          | 55176                                                          |
| Independent reflections                        | 12278 [ $R_{\text{int}} = 0.0298, R_{\text{sigma}} = 0.0274$ ] |
| Data/restraints/parameters                     | 12278/0/442                                                    |
| Goodness-of-fit on $F^2$                       | 1.029                                                          |
| Final R indexes [ $I \geq 2\sigma(I)$ ]        | $R_1 = 0.0173, wR_2 = 0.0392$                                  |
| Final R indexes [all data]                     | $R_1 = 0.0182, wR_2 = 0.0394$                                  |
| Largest diff. peak/hole / $e \text{\AA}^{-3}$  | 0.67/-1.82                                                     |

**Table S6. Bond Lengths for [(SIPr)Au-Fe(CO)<sub>5</sub>][SbF<sub>6</sub>] (5).**

| Atom | Atom | Length/ $\text{\AA}$ | Atom | Atom | Length/ $\text{\AA}$ |
|------|------|----------------------|------|------|----------------------|
| Au   | Fe   | 2.5535(3)            | C12  | C13  | 1.384(3)             |
| Au   | C2   | 2.672(2)             | C13  | C14  | 1.391(3)             |
| Au   | C6   | 2.0147(16)           | C14  | C18  | 1.510(3)             |
| Fe   | C1   | 1.8386(18)           | C15  | C16  | 1.528(3)             |
| Fe   | C2   | 1.828(3)             | C15  | C17  | 1.523(3)             |
| Fe   | C3   | 1.830(3)             | C18  | C19  | 1.538(3)             |
| Fe   | C4   | 1.821(3)             | C18  | C20  | 1.533(3)             |
| Fe   | C5   | 1.830(2)             | C21  | C22  | 1.406(3)             |
| O1   | C1   | 1.122(2)             | C21  | C26  | 1.402(3)             |
| O2   | C2   | 1.136(3)             | C22  | C23  | 1.393(3)             |
| O3   | C3   | 1.126(3)             | C22  | C27  | 1.519(3)             |
| O4   | C4   | 1.136(3)             | C23  | C24  | 1.397(3)             |
| O5   | C5   | 1.126(3)             | C24  | C25  | 1.382(3)             |
| N1   | C6   | 1.319(2)             | C25  | C26  | 1.398(3)             |
| N1   | C7   | 1.479(2)             | C26  | C30  | 1.520(3)             |
| N1   | C9   | 1.428(2)             | C27  | C28  | 1.529(3)             |
| N2   | C6   | 1.322(2)             | C27  | C29  | 1.533(3)             |
| N2   | C8   | 1.473(2)             | C30  | C31  | 1.523(3)             |
| N2   | C21  | 1.430(2)             | C30  | C32  | 1.527(3)             |
| C7   | C8   | 1.539(3)             | Sb   | F1   | 1.8773(14)           |
| C9   | C10  | 1.408(3)             | Sb   | F2   | 1.8798(14)           |

|     |     |          |    |    |            |
|-----|-----|----------|----|----|------------|
| C9  | C14 | 1.402(3) | Sb | F3 | 1.8676(16) |
| C10 | C11 | 1.389(3) | Sb | F4 | 1.8654(15) |
| C10 | C15 | 1.514(3) | Sb | F5 | 1.8739(16) |
| C11 | C12 | 1.392(3) | Sb | F6 | 1.8759(13) |

**Table S7. Bond Angles for [(SIPr)Au-Fe(CO)<sub>5</sub>][SbF<sub>6</sub>] (5).**

| Atom | Atom | Atom | Angle/°    | Atom | Atom | Atom | Angle/°    |
|------|------|------|------------|------|------|------|------------|
| Fe   | Au   | C2   | 40.88(5)   | C12  | C13  | C14  | 120.8(2)   |
| C6   | Au   | Fe   | 177.97(5)  | C9   | C14  | C18  | 122.38(18) |
| C6   | Au   | C2   | 137.36(7)  | C13  | C14  | C9   | 117.5(2)   |
| C1   | Fe   | Au   | 178.30(7)  | C13  | C14  | C18  | 120.10(19) |
| C2   | Fe   | Au   | 73.06(7)   | C10  | C15  | C16  | 110.92(18) |
| C2   | Fe   | C1   | 105.27(10) | C10  | C15  | C17  | 112.04(19) |
| C2   | Fe   | C3   | 88.65(11)  | C17  | C15  | C16  | 111.0(2)   |
| C2   | Fe   | C5   | 89.75(11)  | C14  | C18  | C19  | 111.2(2)   |
| C3   | Fe   | Au   | 86.19(8)   | C14  | C18  | C20  | 110.33(19) |
| C3   | Fe   | C1   | 93.54(10)  | C20  | C18  | C19  | 111.67(19) |
| C3   | Fe   | C5   | 172.58(10) | C22  | C21  | N2   | 118.96(17) |
| C4   | Fe   | Au   | 76.01(8)   | C26  | C21  | N2   | 118.42(18) |
| C4   | Fe   | C1   | 105.66(10) | C26  | C21  | C22  | 122.54(18) |
| C4   | Fe   | C2   | 149.06(10) | C21  | C22  | C27  | 120.98(18) |
| C4   | Fe   | C3   | 88.54(13)  | C23  | C22  | C21  | 117.78(18) |
| C4   | Fe   | C5   | 89.11(13)  | C23  | C22  | C27  | 121.16(18) |
| C5   | Fe   | Au   | 86.42(6)   | C22  | C23  | C24  | 120.5(2)   |
| C5   | Fe   | C1   | 93.87(8)   | C25  | C24  | C23  | 120.7(2)   |
| C6   | N1   | C7   | 112.32(15) | C24  | C25  | C26  | 120.82(19) |
| C6   | N1   | C9   | 123.99(16) | C21  | C26  | C30  | 122.07(18) |
| C9   | N1   | C7   | 123.69(15) | C25  | C26  | C21  | 117.64(19) |
| C6   | N2   | C8   | 112.19(15) | C25  | C26  | C30  | 120.28(18) |
| C6   | N2   | C21  | 122.66(16) | C22  | C27  | C28  | 112.79(18) |
| C21  | N2   | C8   | 124.65(16) | C22  | C27  | C29  | 109.32(18) |
| O1   | C1   | Fe   | 177.45(17) | C28  | C27  | C29  | 111.19(19) |
| Fe   | C2   | Au   | 66.07(7)   | C26  | C30  | C31  | 109.65(18) |
| O2   | C2   | Au   | 115.05(18) | C26  | C30  | C32  | 111.9(2)   |
| O2   | C2   | Fe   | 178.6(2)   | C31  | C30  | C32  | 111.67(18) |
| O3   | C3   | Fe   | 179.7(3)   | F1   | Sb   | F2   | 89.75(7)   |
| O4   | C4   | Fe   | 179.4(3)   | F3   | Sb   | F1   | 90.93(9)   |
| O5   | C5   | Fe   | 179.4(2)   | F3   | Sb   | F2   | 90.65(8)   |
| N1   | C6   | Au   | 124.80(13) | F3   | Sb   | F5   | 178.81(9)  |

|     |     |     |            |    |    |    |            |
|-----|-----|-----|------------|----|----|----|------------|
| N1  | C6  | N2  | 110.65(14) | F3 | Sb | F6 | 89.32(8)   |
| N2  | C6  | Au  | 124.54(14) | F4 | Sb | F1 | 90.91(10)  |
| N1  | C7  | C8  | 102.13(16) | F4 | Sb | F2 | 179.01(10) |
| N2  | C8  | C7  | 102.62(16) | F4 | Sb | F3 | 90.08(8)   |
| C10 | C9  | N1  | 118.90(18) | F4 | Sb | F5 | 90.75(9)   |
| C14 | C9  | N1  | 118.15(18) | F4 | Sb | F6 | 89.71(9)   |
| C14 | C9  | C10 | 122.93(18) | F5 | Sb | F1 | 89.91(8)   |
| C9  | C10 | C15 | 121.16(18) | F5 | Sb | F2 | 88.52(7)   |
| C11 | C10 | C9  | 117.21(19) | F5 | Sb | F6 | 89.83(7)   |
| C11 | C10 | C15 | 121.61(19) | F6 | Sb | F1 | 179.34(7)  |
| C10 | C11 | C12 | 120.9(2)   | F6 | Sb | F2 | 89.63(7)   |
| C13 | C12 | C11 | 120.6(2)   |    |    |    |            |

**Figure S36.** Molecular structure and atom numbering scheme for  $[(^{E12}\text{CAAC})\text{AuFe}(\text{CO})_5][\text{SbF}_6]$

(6). Hydrogen atoms have been omitted for clarity.

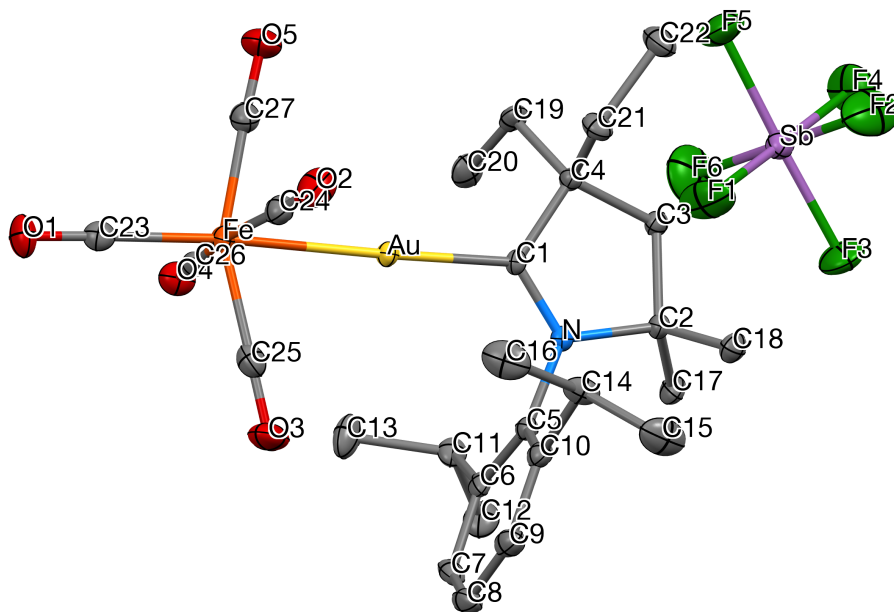

**Table S8.** Crystal data and structure refinement for  $[(^{E12}\text{CAAC})\text{AuFe}(\text{CO})_5][\text{SbF}_6]$  (6).

|                                    |                                                                |
|------------------------------------|----------------------------------------------------------------|
| Identification code                | RAD736                                                         |
| Empirical formula                  | $\text{C}_{27}\text{H}_{35}\text{AuF}_6\text{FeNO}_5\text{Sb}$ |
| Formula weight                     | 942.12                                                         |
| Temperature/K                      | 100.01                                                         |
| Crystal system                     | monoclinic                                                     |
| Space group                        | $P2_1/n$                                                       |
| $a/\text{\AA}$                     | 14.2376(9)                                                     |
| $b/\text{\AA}$                     | 15.3986(10)                                                    |
| $c/\text{\AA}$                     | 14.8972(9)                                                     |
| $\alpha/^\circ$                    | 90                                                             |
| $\beta/^\circ$                     | 98.783(2)                                                      |
| $\gamma/^\circ$                    | 90                                                             |
| Volume/ $\text{\AA}^3$             | 3227.8(4)                                                      |
| Z                                  | 4                                                              |
| $\rho_{\text{calc}}/\text{g/cm}^3$ | 1.939                                                          |
| $\mu/\text{mm}^{-1}$               | 5.878                                                          |
| F(000)                             | 1816.0                                                         |
| Crystal size/ $\text{mm}^3$        | $0.11 \times 0.11 \times 0.1$                                  |

|                                                  |                                                                    |
|--------------------------------------------------|--------------------------------------------------------------------|
| Radiation                                        | MoK $\alpha$ ( $\lambda = 0.71073$ )                               |
| 2 $\theta$ range for data collection/ $^{\circ}$ | 5.79 to 61.128                                                     |
| Index ranges                                     | $-20 \leq h \leq 20$ , $-22 \leq k \leq 22$ , $-21 \leq l \leq 21$ |
| Reflections collected                            | 81911                                                              |
| Independent reflections                          | 9890 [ $R_{\text{int}} = 0.0914$ , $R_{\text{sigma}} = 0.0546$ ]   |
| Data/restraints/parameters                       | 9890/0/387                                                         |
| Goodness-of-fit on $F^2$                         | 1.019                                                              |
| Final R indexes [ $I \geq 2\sigma(I)$ ]          | $R_1 = 0.0358$ , $wR_2 = 0.0534$                                   |
| Final R indexes [all data]                       | $R_1 = 0.0626$ , $wR_2 = 0.0594$                                   |
| Largest diff. peak/hole / $e \text{ \AA}^{-3}$   | 0.86/-1.29                                                         |

**Table S9. Bond Lengths for [(<sup>Et</sup>2CAAC)AuFe(CO)<sub>5</sub>][SbF<sub>6</sub>] (6).**

| Atom | Atom | Length/ $\text{\AA}$ | Atom | Atom | Length/ $\text{\AA}$ |
|------|------|----------------------|------|------|----------------------|
| Au   | Fe   | 2.5696(5)            | C4   | C21  | 1.549(5)             |
| Au   | C1   | 2.020(3)             | C5   | C6   | 1.399(5)             |
| Fe   | C23  | 1.859(4)             | C5   | C10  | 1.406(5)             |
| Fe   | C24  | 1.838(4)             | C6   | C7   | 1.397(5)             |
| Fe   | C25  | 1.831(4)             | C6   | C11  | 1.514(5)             |
| Fe   | C26  | 1.815(4)             | C7   | C8   | 1.372(6)             |
| Fe   | C27  | 1.835(4)             | C8   | C9   | 1.384(6)             |
| O1   | C23  | 1.123(4)             | C9   | C10  | 1.393(5)             |
| O2   | C24  | 1.126(5)             | C10  | C14  | 1.528(5)             |
| O3   | C25  | 1.129(5)             | C11  | C12  | 1.532(5)             |
| O4   | C26  | 1.130(4)             | C11  | C13  | 1.536(5)             |
| O5   | C27  | 1.132(5)             | C14  | C15  | 1.528(6)             |
| N    | C1   | 1.293(4)             | C14  | C16  | 1.532(6)             |
| N    | C2   | 1.535(4)             | C19  | C20  | 1.520(5)             |
| N    | C5   | 1.458(4)             | C21  | C22  | 1.530(5)             |
| C1   | C4   | 1.498(5)             | Sb   | F1   | 1.862(3)             |
| C2   | C3   | 1.534(5)             | Sb   | F2   | 1.867(3)             |
| C2   | C17  | 1.523(5)             | Sb   | F3   | 1.870(3)             |
| C2   | C18  | 1.534(5)             | Sb   | F4   | 1.866(3)             |
| C3   | C4   | 1.555(5)             | Sb   | F5   | 1.882(3)             |
| C4   | C19  | 1.530(5)             | Sb   | F6   | 1.852(3)             |

**Table S10. Bond Angles for [(<sup>Et</sup>2CAAC)AuFe(CO)<sub>5</sub>][SbF<sub>6</sub>] (6).**

| Atom | Atom | Atom | Angle/ $^{\circ}$ | Atom | Atom | Atom | Angle/ $^{\circ}$ |
|------|------|------|-------------------|------|------|------|-------------------|
| C1   | Au   | Fe   | 177.85(10)        | C5   | C6   | C11  | 123.6(3)          |
| C23  | Fe   | Au   | 173.46(12)        | C7   | C6   | C5   | 117.1(3)          |



|     |    |     |            |     |     |     |            |
|-----|----|-----|------------|-----|-----|-----|------------|
| C24 | Fe | Au  | 86.03(12)  | C7  | C6  | C11 | 119.1(3)   |
| C24 | Fe | C23 | 99.99(17)  | C8  | C7  | C6  | 121.2(4)   |
| C25 | Fe | Au  | 76.40(13)  | C7  | C8  | C9  | 120.6(4)   |
| C25 | Fe | C23 | 101.02(17) | C8  | C9  | C10 | 121.0(4)   |
| C25 | Fe | C24 | 88.93(17)  | C5  | C10 | C14 | 123.8(3)   |
| C25 | Fe | C27 | 156.09(18) | C9  | C10 | C5  | 117.1(3)   |
| C26 | Fe | Au  | 80.07(12)  | C9  | C10 | C14 | 119.0(3)   |
| C26 | Fe | C23 | 94.01(17)  | C6  | C11 | C12 | 113.4(3)   |
| C26 | Fe | C24 | 165.87(17) | C6  | C11 | C13 | 109.4(3)   |
| C26 | Fe | C25 | 90.28(17)  | C12 | C11 | C13 | 110.0(3)   |
| C26 | Fe | C27 | 88.75(17)  | C10 | C14 | C16 | 110.2(3)   |
| C27 | Fe | Au  | 79.90(12)  | C15 | C14 | C10 | 112.0(3)   |
| C27 | Fe | C23 | 102.88(17) | C15 | C14 | C16 | 110.6(3)   |
| C27 | Fe | C24 | 86.29(18)  | C20 | C19 | C4  | 114.2(3)   |
| C1  | N  | C2  | 114.4(3)   | C22 | C21 | C4  | 114.9(3)   |
| C1  | N  | C5  | 123.0(3)   | O1  | C23 | Fe  | 175.5(3)   |
| C5  | N  | C2  | 122.5(3)   | O2  | C24 | Fe  | 175.5(4)   |
| N   | C1 | Au  | 124.2(3)   | O3  | C25 | Fe  | 178.7(4)   |
| N   | C1 | C4  | 112.0(3)   | O4  | C26 | Fe  | 179.0(4)   |
| C4  | C1 | Au  | 123.7(2)   | O5  | C27 | Fe  | 177.8(4)   |
| C3  | C2 | N   | 101.0(3)   | F1  | Sb  | F2  | 90.25(16)  |
| C3  | C2 | C18 | 112.7(3)   | F1  | Sb  | F3  | 90.36(13)  |
| C17 | C2 | N   | 111.3(3)   | F1  | Sb  | F4  | 179.56(14) |
| C17 | C2 | C3  | 112.5(3)   | F1  | Sb  | F5  | 90.39(12)  |
| C17 | C2 | C18 | 109.4(3)   | F2  | Sb  | F3  | 88.94(14)  |
| C18 | C2 | N   | 109.6(3)   | F2  | Sb  | F5  | 89.36(14)  |
| C2  | C3 | C4  | 107.4(3)   | F3  | Sb  | F5  | 178.14(13) |
| C1  | C4 | C3  | 103.1(3)   | F4  | Sb  | F2  | 89.70(16)  |
| C1  | C4 | C19 | 111.0(3)   | F4  | Sb  | F3  | 90.07(13)  |
| C1  | C4 | C21 | 105.7(3)   | F4  | Sb  | F5  | 89.17(13)  |
| C19 | C4 | C3  | 112.7(3)   | F6  | Sb  | F1  | 90.00(16)  |
| C19 | C4 | C21 | 111.6(3)   | F6  | Sb  | F2  | 179.70(17) |
| C21 | C4 | C3  | 112.2(3)   | F6  | Sb  | F3  | 90.88(15)  |
| C6  | C5 | N   | 118.9(3)   | F6  | Sb  | F4  | 90.06(16)  |
| C6  | C5 | C10 | 122.8(3)   | F6  | Sb  | F5  | 90.82(15)  |
| C10 | C5 | N   | 118.3(3)   |     |     |     |            |

**Figure S37.** Molecular structure and atom numbering scheme for [(SIPr)AuMn(CO)<sub>5</sub>] (7)•THF.

Hydrogen atoms have been omitted for clarity.

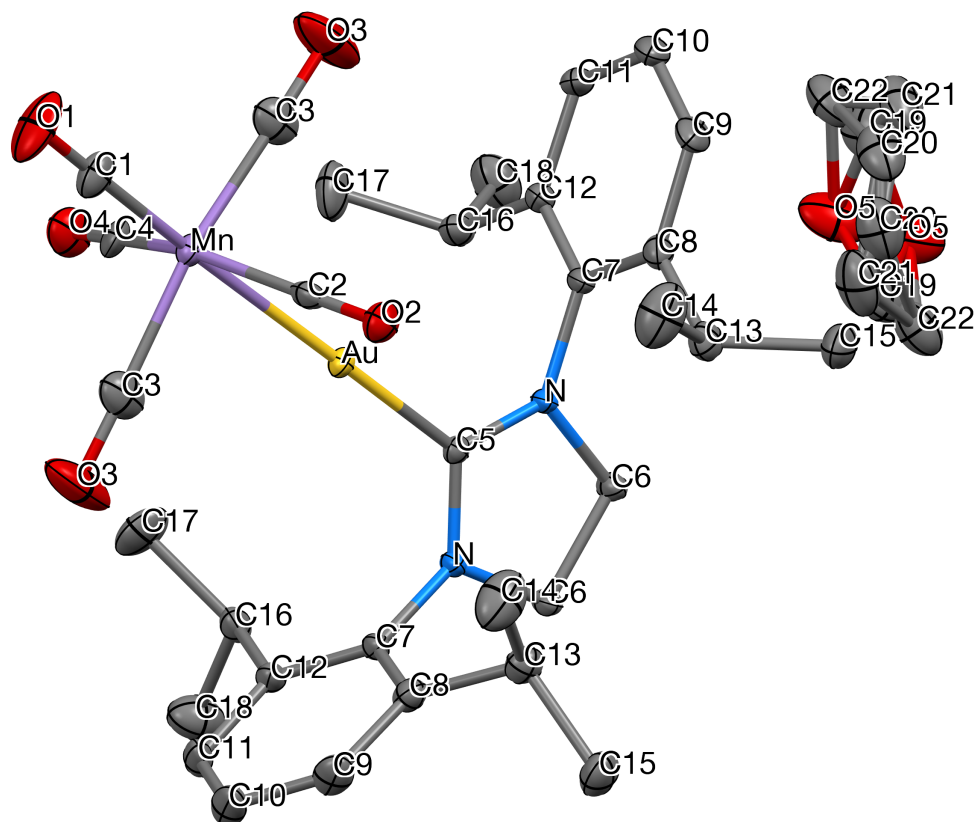

**Table S11. Crystal data and structure refinement** [(SIPr)AuMn(CO)<sub>5</sub>] (7)•THF.

|                     |                                                                   |
|---------------------|-------------------------------------------------------------------|
| Identification code | RAD568                                                            |
| Empirical formula   | C <sub>36</sub> H <sub>46</sub> AuMnN <sub>2</sub> O <sub>6</sub> |
| Formula weight      | 854.65                                                            |
| Temperature/K       | 100.01                                                            |
| Crystal system      | orthorhombic                                                      |
| Space group         | Pbcm                                                              |
| a/Å                 | 8.6463(5)                                                         |
| b/Å                 | 19.4473(12)                                                       |
| c/Å                 | 21.4257(13)                                                       |
| α/°                 | 90                                                                |
| β/°                 | 90                                                                |
| γ/°                 | 90                                                                |

|                                             |                                                               |
|---------------------------------------------|---------------------------------------------------------------|
| Volume/Å <sup>3</sup>                       | 3602.7(4)                                                     |
| Z                                           | 4                                                             |
| ρ <sub>calc</sub> /cm <sup>3</sup>          | 1.576                                                         |
| μ/mm <sup>-1</sup>                          | 4.463                                                         |
| F(000)                                      | 1712.0                                                        |
| Crystal size/mm <sup>3</sup>                | 0.18 × 0.14 × 0.06                                            |
| Radiation                                   | MoKα (λ = 0.71073)                                            |
| 2θ range for data collection/°              | 6.056 to 56.556                                               |
| Index ranges                                | -11 ≤ h ≤ 11, -25 ≤ k ≤ 25, -28 ≤ l ≤ 28                      |
| Reflections collected                       | 41145                                                         |
| Independent reflections                     | 4588 [R <sub>int</sub> = 0.0457, R <sub>sigma</sub> = 0.0244] |
| Data/restraints/parameters                  | 4588/0/248                                                    |
| Goodness-of-fit on F <sup>2</sup>           | 1.034                                                         |
| Final R indexes [I ≥ 2σ (I)]                | R <sub>1</sub> = 0.0196, wR <sub>2</sub> = 0.0375             |
| Final R indexes [all data]                  | R <sub>1</sub> = 0.0248, wR <sub>2</sub> = 0.0388             |
| Largest diff. peak/hole / e Å <sup>-3</sup> | 0.58/-0.91                                                    |

**Table S12. Bond Lengths for [(SIPr)AuMn(CO)<sub>5</sub>] (7)•THF.**

| Atom | Atom            | Length/Å  | Atom | Atom | Length/Å  |
|------|-----------------|-----------|------|------|-----------|
| Au   | Mn              | 2.5754(4) | C7   | C12  | 1.399(3)  |
| Au   | C2              | 2.688(3)  | C8   | C9   | 1.396(3)  |
| Au   | C5              | 2.025(3)  | C8   | C13  | 1.515(3)  |
| Mn   | C1              | 1.805(3)  | C9   | C10  | 1.380(3)  |
| Mn   | C2              | 1.829(3)  | C10  | C11  | 1.380(3)  |
| Mn   | C3              | 1.834(2)  | C11  | C12  | 1.394(3)  |
| Mn   | C3 <sup>1</sup> | 1.834(2)  | C12  | C16  | 1.513(3)  |
| Mn   | C4              | 1.833(3)  | C13  | C14  | 1.527(3)  |
| O1   | C1              | 1.147(4)  | C13  | C15  | 1.527(3)  |
| O2   | C2              | 1.151(4)  | C16  | C17  | 1.522(3)  |
| O3   | C3              | 1.139(3)  | C16  | C18  | 1.518(3)  |
| O4   | C4              | 1.142(4)  | O5   | C19  | 1.415(11) |
| N    | C5              | 1.328(2)  | O5   | C22  | 1.438(11) |
| N    | C6              | 1.474(2)  | C19  | C20  | 1.503(13) |
| N    | C7              | 1.439(2)  | C20  | C21  | 1.508(11) |
| C6   | C6 <sup>1</sup> | 1.535(4)  | C21  | C22  | 1.496(13) |
| C7   | C8              | 1.397(3)  |      |      |           |

<sup>1</sup>+X,+Y,3/2-Z

**Table S13. Bond Angles for [(SIPr)AuMn(CO)<sub>5</sub>] (7)•THF.**

| Atom            | Atom | Atom            | Angle/°    | Atom           | Atom | Atom            | Angle/°    |
|-----------------|------|-----------------|------------|----------------|------|-----------------|------------|
| Mn              | Au   | C2              | 40.60(7)   | N <sup>1</sup> | C5   | Au              | 125.30(11) |
| C5              | Au   | Mn              | 177.90(7)  | N              | C5   | Au              | 125.30(12) |
| C5              | Au   | C2              | 141.51(10) | N <sup>1</sup> | C5   | N               | 109.4(2)   |
| C1              | Mn   | Au              | 173.24(10) | N              | C6   | C6 <sup>1</sup> | 102.38(9)  |
| C1              | Mn   | C2              | 100.21(14) | C8             | C7   | N               | 118.53(17) |
| C1              | Mn   | C3              | 96.40(9)   | C8             | C7   | C12             | 122.56(18) |
| C1              | Mn   | C3 <sup>1</sup> | 96.40(9)   | C12            | C7   | N               | 118.90(17) |
| C1              | Mn   | C4              | 104.69(13) | C7             | C8   | C13             | 123.17(18) |
| C2              | Mn   | Au              | 73.02(9)   | C9             | C8   | C7              | 117.60(19) |
| C2              | Mn   | C3              | 90.04(7)   | C9             | C8   | C13             | 119.23(19) |
| C2              | Mn   | C3 <sup>1</sup> | 90.04(7)   | C10            | C9   | C8              | 120.7(2)   |
| C2              | Mn   | C4              | 155.10(13) | C11            | C10  | C9              | 120.7(2)   |
| C3 <sup>1</sup> | Mn   | Au              | 83.79(9)   | C10            | C11  | C12             | 120.7(2)   |
| C3              | Mn   | Au              | 83.79(9)   | C7             | C12  | C16             | 122.02(18) |
| C3 <sup>1</sup> | Mn   | C3              | 166.98(17) | C11            | C12  | C7              | 117.66(19) |
| C4              | Mn   | Au              | 82.07(9)   | C11            | C12  | C16             | 120.31(19) |
| C4              | Mn   | C3 <sup>1</sup> | 87.22(7)   | C8             | C13  | C14             | 110.68(19) |
| C4              | Mn   | C3              | 87.22(7)   | C8             | C13  | C15             | 111.68(19) |
| C5              | N    | C6              | 112.94(16) | C14            | C13  | C15             | 110.57(19) |
| C5              | N    | C7              | 124.79(17) | C12            | C16  | C17             | 110.89(19) |
| C7              | N    | C6              | 121.90(15) | C12            | C16  | C18             | 112.20(19) |
| O1              | C1   | Mn              | 178.6(3)   | C18            | C16  | C17             | 110.8(2)   |
| Mn              | C2   | Au              | 66.38(9)   | C19            | O5   | C22             | 109.4(4)   |
| O2              | C2   | Au              | 115.2(2)   | O5             | C19  | C20             | 106.1(7)   |
| O2              | C2   | Mn              | 178.4(3)   | C19            | C20  | C21             | 102.1(8)   |
| O3              | C3   | Mn              | 178.1(2)   | C22            | C21  | C20             | 101.7(7)   |
| O4              | C4   | Mn              | 179.1(3)   | O5             | C22  | C21             | 106.0(7)   |

<sup>1</sup>+X,+Y,3/2-Z

**Figure S38.** Molecular structure and atom numbering scheme for [Mes<sub>3</sub>PAuMn(CO)<sub>5</sub>] (**8**).

Hydrogen atoms have been omitted for clarity.

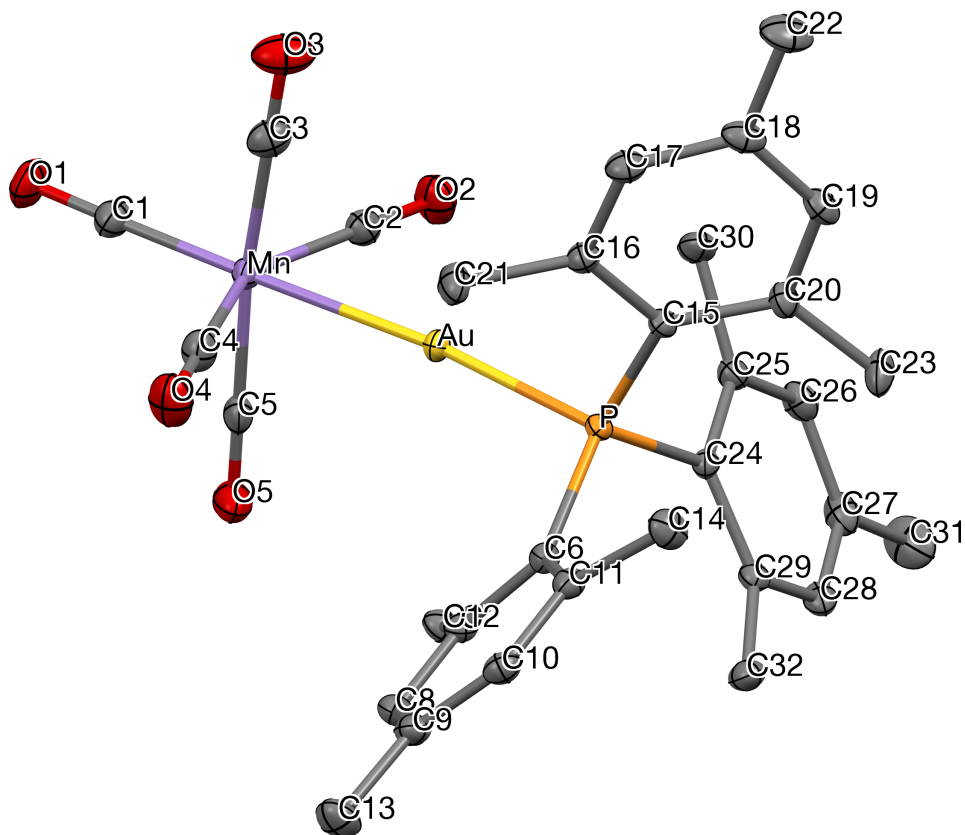

**Table S14. Crystal data and structure refinement for [Mes<sub>3</sub>PAuMn(CO)<sub>5</sub>] (**8**).**

|                     |                                                      |
|---------------------|------------------------------------------------------|
| Identification code | RAD575                                               |
| Empirical formula   | C <sub>32</sub> H <sub>33</sub> AuMnO <sub>5</sub> P |
| Formula weight      | 780.46                                               |
| Temperature/K       | 99.94                                                |
| Crystal system      | triclinic                                            |
| Space group         | P-1                                                  |
| a/Å                 | 10.8061(8)                                           |
| b/Å                 | 11.9033(9)                                           |
| c/Å                 | 13.6638(10)                                          |
| α/°                 | 82.628(2)                                            |
| β/°                 | 78.028(2)                                            |
| γ/°                 | 64.197(2)                                            |

|                                             |                                                               |
|---------------------------------------------|---------------------------------------------------------------|
| Volume/Å <sup>3</sup>                       | 1546.5(2)                                                     |
| Z                                           | 2                                                             |
| ρ <sub>calc</sub> /cm <sup>3</sup>          | 1.676                                                         |
| μ/mm <sup>-1</sup>                          | 5.235                                                         |
| F(000)                                      | 768.0                                                         |
| Crystal size/mm <sup>3</sup>                | 0.14 × 0.09 × 0.07                                            |
| Radiation                                   | MoKα (λ = 0.71073)                                            |
| 2θ range for data collection/°              | 6.102 to 61.016                                               |
| Index ranges                                | -15 ≤ h ≤ 15, -16 ≤ k ≤ 16, -19 ≤ l ≤ 19                      |
| Reflections collected                       | 21831                                                         |
| Independent reflections                     | 9373 [R <sub>int</sub> = 0.0175, R <sub>sigma</sub> = 0.0241] |
| Data/restraints/parameters                  | 9373/0/370                                                    |
| Goodness-of-fit on F <sup>2</sup>           | 1.041                                                         |
| Final R indexes [I ≥ 2σ (I)]                | R <sub>1</sub> = 0.0177, wR <sub>2</sub> = 0.0433             |
| Final R indexes [all data]                  | R <sub>1</sub> = 0.0191, wR <sub>2</sub> = 0.0438             |
| Largest diff. peak/hole / e Å <sup>-3</sup> | 0.78/-1.56                                                    |

**Table S15. Bond Lengths for [Mes<sub>3</sub>PAuMn(CO)<sub>5</sub>] (8).**

| Atom | Atom | Length/Å   | Atom | Atom | Length/Å |
|------|------|------------|------|------|----------|
| Au   | Mn   | 2.5746(3)  | C9   | C13  | 1.509(2) |
| Au   | P    | 2.3238(4)  | C10  | C11  | 1.393(2) |
| Mn   | C1   | 1.8215(18) | C11  | C14  | 1.515(2) |
| Mn   | C2   | 1.8251(18) | C15  | C16  | 1.418(2) |
| Mn   | C3   | 1.8408(19) | C15  | C20  | 1.413(2) |
| Mn   | C4   | 1.8436(18) | C16  | C17  | 1.395(2) |
| Mn   | C5   | 1.8443(19) | C16  | C21  | 1.506(2) |
| P    | C6   | 1.8409(16) | C17  | C18  | 1.385(2) |
| P    | C15  | 1.8336(16) | C18  | C19  | 1.388(3) |
| P    | C24  | 1.8325(16) | C18  | C22  | 1.504(2) |
| O1   | C1   | 1.146(2)   | C19  | C20  | 1.397(2) |
| O2   | C2   | 1.147(2)   | C20  | C23  | 1.509(2) |
| O3   | C3   | 1.140(2)   | C24  | C25  | 1.416(2) |
| O4   | C4   | 1.145(2)   | C24  | C29  | 1.414(2) |
| O5   | C5   | 1.142(2)   | C25  | C26  | 1.393(2) |
| C6   | C7   | 1.417(2)   | C25  | C30  | 1.511(2) |
| C6   | C11  | 1.415(2)   | C26  | C27  | 1.387(3) |
| C7   | C8   | 1.391(2)   | C27  | C28  | 1.382(3) |
| C7   | C12  | 1.510(2)   | C27  | C31  | 1.507(3) |
| C8   | C9   | 1.387(2)   | C28  | C29  | 1.400(2) |
| C9   | C10  | 1.388(2)   | C29  | C32  | 1.504(2) |

**Table S16. Bond Angles for [Mes<sub>3</sub>PAuMn(CO)<sub>5</sub>] (8).**

| Atom | Atom | Atom | Angle/°     | Atom | Atom | Atom | Angle/°    |
|------|------|------|-------------|------|------|------|------------|
| P    | Au   | Mn   | 174.496(11) | C8   | C9   | C13  | 120.48(16) |
| C1   | Mn   | Au   | 178.72(6)   | C10  | C9   | C13  | 121.87(16) |
| C1   | Mn   | C2   | 104.78(8)   | C9   | C10  | C11  | 122.71(15) |
| C1   | Mn   | C3   | 93.43(8)    | C6   | C11  | C14  | 124.75(15) |
| C1   | Mn   | C4   | 105.36(8)   | C10  | C11  | C6   | 118.89(15) |
| C1   | Mn   | C5   | 92.79(8)    | C10  | C11  | C14  | 116.29(15) |
| C2   | Mn   | Au   | 75.10(6)    | C16  | C15  | P    | 116.78(12) |
| C2   | Mn   | C3   | 89.63(8)    | C20  | C15  | P    | 123.99(12) |
| C2   | Mn   | C4   | 149.83(8)   | C20  | C15  | C16  | 119.11(14) |
| C2   | Mn   | C5   | 88.92(8)    | C15  | C16  | C21  | 124.00(14) |
| C3   | Mn   | Au   | 85.30(6)    | C17  | C16  | C15  | 119.12(15) |
| C3   | Mn   | C4   | 89.81(8)    | C17  | C16  | C21  | 116.82(15) |
| C3   | Mn   | C5   | 173.78(8)   | C18  | C17  | C16  | 122.22(16) |
| C4   | Mn   | Au   | 74.79(6)    | C17  | C18  | C19  | 117.92(15) |
| C4   | Mn   | C5   | 88.41(8)    | C17  | C18  | C22  | 121.16(17) |
| C5   | Mn   | Au   | 88.48(5)    | C19  | C18  | C22  | 120.91(17) |
| C6   | P    | Au   | 105.86(5)   | C18  | C19  | C20  | 122.38(16) |
| C15  | P    | Au   | 110.78(5)   | C15  | C20  | C23  | 124.95(15) |
| C15  | P    | C6   | 110.08(7)   | C19  | C20  | C15  | 118.91(15) |
| C24  | P    | Au   | 107.20(5)   | C19  | C20  | C23  | 116.09(15) |
| C24  | P    | C6   | 112.54(7)   | C25  | C24  | P    | 116.78(11) |
| C24  | P    | C15  | 110.26(7)   | C29  | C24  | P    | 123.83(12) |
| O1   | C1   | Mn   | 178.65(18)  | C29  | C24  | C25  | 119.21(14) |
| O2   | C2   | Mn   | 179.04(16)  | C24  | C25  | C30  | 123.77(15) |
| O3   | C3   | Mn   | 179.34(18)  | C26  | C25  | C24  | 119.40(15) |
| O4   | C4   | Mn   | 178.97(18)  | C26  | C25  | C30  | 116.78(15) |
| O5   | C5   | Mn   | 179.75(19)  | C27  | C26  | C25  | 121.96(16) |
| C7   | C6   | P    | 116.71(12)  | C26  | C27  | C31  | 121.08(18) |
| C11  | C6   | P    | 124.03(12)  | C28  | C27  | C26  | 117.96(15) |
| C11  | C6   | C7   | 118.72(14)  | C28  | C27  | C31  | 120.95(17) |
| C6   | C7   | C12  | 124.28(14)  | C27  | C28  | C29  | 122.76(16) |
| C8   | C7   | C6   | 119.48(15)  | C24  | C29  | C32  | 125.01(14) |
| C8   | C7   | C12  | 116.05(14)  | C28  | C29  | C24  | 118.45(15) |
| C9   | C8   | C7   | 122.14(15)  | C28  | C29  | C32  | 116.45(14) |
| C8   | C9   | C10  | 117.62(15)  |      |      |      |            |

**Figure S39.** Molecular structure and atom numbering scheme for [(SIPr)AgMn(CO)<sub>5</sub>] (**9**)•THF.

Hydrogen atoms have been omitted for clarity.

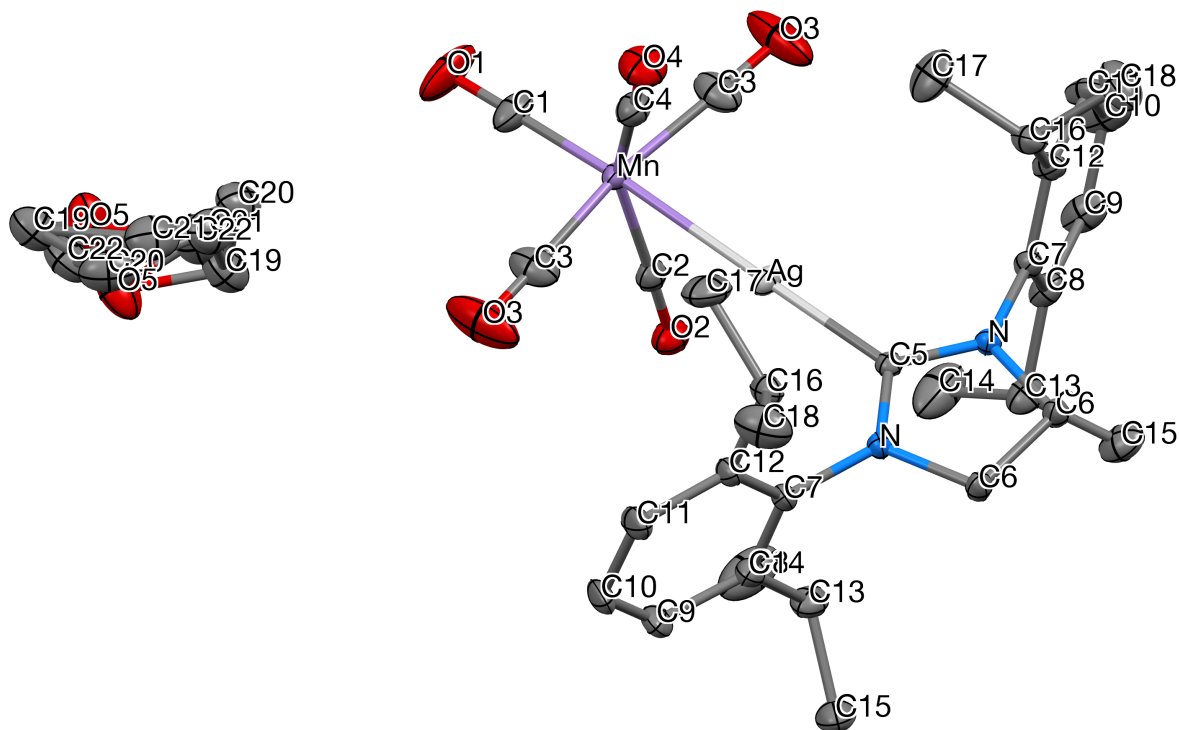

**Table S17. Crystal data and structure refinement for [(SIPr)AgMn(CO)<sub>5</sub>] (**9**)•THF.**

|                                    |                                                                   |
|------------------------------------|-------------------------------------------------------------------|
| Identification code                | RAD569                                                            |
| Empirical formula                  | C <sub>36</sub> H <sub>46</sub> AgMnN <sub>2</sub> O <sub>6</sub> |
| Formula weight                     | 765.56                                                            |
| Temperature/K                      | 100.0                                                             |
| Crystal system                     | orthorhombic                                                      |
| Space group                        | Pbcm                                                              |
| a/Å                                | 8.6971(6)                                                         |
| b/Å                                | 19.4845(13)                                                       |
| c/Å                                | 21.3902(14)                                                       |
| α/°                                | 90                                                                |
| β/°                                | 90                                                                |
| γ/°                                | 90                                                                |
| Volume/Å <sup>3</sup>              | 3624.8(4)                                                         |
| Z                                  | 4                                                                 |
| ρ <sub>calc</sub> /cm <sup>3</sup> | 1.403                                                             |
| μ/mm <sup>-1</sup>                 | 0.933                                                             |



|                                                  |                                                                        |
|--------------------------------------------------|------------------------------------------------------------------------|
| F(000)                                           | 1584.0                                                                 |
| Crystal size/mm <sup>3</sup>                     | 0.18 × 0.1 × 0.1                                                       |
| Radiation                                        | MoK $\alpha$ ( $\lambda$ = 0.71073)                                    |
| 2 $\Theta$ range for data collection/ $^{\circ}$ | 6.038 to 63.01                                                         |
| Index ranges                                     | -12 $\leq$ h $\leq$ 12, -28 $\leq$ k $\leq$ 28, -31 $\leq$ l $\leq$ 31 |
| Reflections collected                            | 51706                                                                  |
| Independent reflections                          | 6180 [R <sub>int</sub> = 0.0296, R <sub>sigma</sub> = 0.0168]          |
| Data/restraints/parameters                       | 6180/66/248                                                            |
| Goodness-of-fit on F <sup>2</sup>                | 1.053                                                                  |
| Final R indexes [I $\geq$ 2 $\sigma$ (I)]        | R <sub>1</sub> = 0.0239, wR <sub>2</sub> = 0.0590                      |
| Final R indexes [all data]                       | R <sub>1</sub> = 0.0284, wR <sub>2</sub> = 0.0613                      |
| Largest diff. peak/hole / e $\text{\AA}^{-3}$    | 0.48/-0.73                                                             |

**Table S18. Bond Lengths for [(SIPr)AgMn(CO)<sub>5</sub>] (9)•THF.**

| Atom | Atom            | Length/ $\text{\AA}$ | Atom | Atom | Length/ $\text{\AA}$ |
|------|-----------------|----------------------|------|------|----------------------|
| Ag   | Mn              | 2.5905(3)            | C7   | C12  | 1.4010(15)           |
| Ag   | C2              | 2.6789(17)           | C8   | C9   | 1.3981(17)           |
| Ag   | C5              | 2.1133(15)           | C8   | C13  | 1.5147(18)           |
| Mn   | C1              | 1.8038(19)           | C9   | C10  | 1.380(2)             |
| Mn   | C2              | 1.8300(17)           | C10  | C11  | 1.384(2)             |
| Mn   | C3 <sup>1</sup> | 1.8318(15)           | C11  | C12  | 1.3950(16)           |
| Mn   | C3              | 1.8318(15)           | C12  | C16  | 1.5169(17)           |
| Mn   | C4              | 1.8360(18)           | C13  | C14  | 1.530(2)             |
| O1   | C1              | 1.144(2)             | C13  | C15  | 1.5285(18)           |
| O2   | C2              | 1.151(2)             | C16  | C17  | 1.5237(18)           |
| O3   | C3              | 1.1407(19)           | C16  | C18  | 1.522(2)             |
| O4   | C4              | 1.145(2)             | O5   | C19  | 1.432(5)             |
| N    | C5              | 1.3307(12)           | O5   | C22  | 1.431(5)             |
| N    | C6              | 1.4773(13)           | C19  | C20  | 1.510(5)             |
| N    | C7              | 1.4376(13)           | C20  | C21  | 1.506(6)             |
| C6   | C6 <sup>1</sup> | 1.534(2)             | C21  | C22  | 1.509(5)             |
| C7   | C8              | 1.4033(15)           |      |      |                      |

<sup>1</sup>+X,+Y,3/2-Z

**Table S19. Bond Angles for [(SIPr)AgMn(CO)<sub>5</sub>] (9)•THF**

| Atom | Atom | Atom | Angle/ $^{\circ}$ | Atom           | Atom | Atom | Angle/ $^{\circ}$ |
|------|------|------|-------------------|----------------|------|------|-------------------|
| Mn   | Ag   | C2   | 40.60(4)          | N <sup>1</sup> | C5   | Ag   | 125.59(6)         |
| C5   | Ag   | Mn   | 179.03(4)         | N              | C5   | Ag   | 125.59(6)         |
| C5   | Ag   | C2   | 140.37(5)         | N <sup>1</sup> | C5   | N    | 108.76(13)        |

|                 |    |                 |            |     |     |                 |            |
|-----------------|----|-----------------|------------|-----|-----|-----------------|------------|
| C1              | Mn | Ag              | 173.56(6)  | N   | C6  | C6 <sup>1</sup> | 102.30(5)  |
| C1              | Mn | C2              | 101.26(8)  | C8  | C7  | N               | 118.74(10) |
| C1              | Mn | C3 <sup>1</sup> | 95.44(6)   | C12 | C7  | N               | 118.94(10) |
| C1              | Mn | C3              | 95.45(6)   | C12 | C7  | C8              | 122.32(10) |
| C1              | Mn | C4              | 106.97(8)  | C7  | C8  | C13             | 122.89(10) |
| C2              | Mn | Ag              | 72.30(5)   | C9  | C8  | C7              | 117.68(11) |
| C2              | Mn | C3 <sup>1</sup> | 90.31(4)   | C9  | C8  | C13             | 119.43(11) |
| C2              | Mn | C3              | 90.30(4)   | C10 | C9  | C8              | 120.89(12) |
| C2              | Mn | C4              | 151.77(8)  | C9  | C10 | C11             | 120.43(12) |
| C3              | Mn | Ag              | 84.74(6)   | C10 | C11 | C12             | 121.01(13) |
| C3 <sup>1</sup> | Mn | Ag              | 84.75(6)   | C7  | C12 | C16             | 121.85(10) |
| C3              | Mn | C3 <sup>1</sup> | 168.76(11) | C11 | C12 | C7              | 117.67(11) |
| C3              | Mn | C4              | 87.08(5)   | C11 | C12 | C16             | 120.47(11) |
| C3 <sup>1</sup> | Mn | C4              | 87.08(5)   | C8  | C13 | C14             | 110.46(12) |
| C4              | Mn | Ag              | 79.47(6)   | C8  | C13 | C15             | 111.59(12) |
| C5              | N  | C6              | 113.31(9)  | C15 | C13 | C14             | 110.42(12) |
| C5              | N  | C7              | 124.35(9)  | C12 | C16 | C17             | 110.58(11) |
| C7              | N  | C6              | 121.97(8)  | C12 | C16 | C18             | 112.27(11) |
| O1              | C1 | Mn              | 178.83(18) | C18 | C16 | C17             | 111.22(12) |
| Mn              | C2 | Ag              | 67.11(5)   | C22 | O5  | C19             | 109.7(3)   |
| O2              | C2 | Ag              | 115.18(12) | O5  | C19 | C20             | 105.5(3)   |
| O2              | C2 | Mn              | 177.71(15) | C21 | C20 | C19             | 102.3(3)   |
| O3              | C3 | Mn              | 178.49(14) | C20 | C21 | C22             | 102.0(3)   |
| O4              | C4 | Mn              | 179.23(16) | O5  | C22 | C21             | 106.1(3)   |

<sup>1</sup>+X,+Y,3/2-Z

**Figure S40.** Molecular structure and atom numbering scheme for [(SIPr)CuNCFe(CO)<sub>4</sub>]  
(12)•CH<sub>2</sub>Cl<sub>2</sub>. Hydrogen atoms have been omitted for clarity.

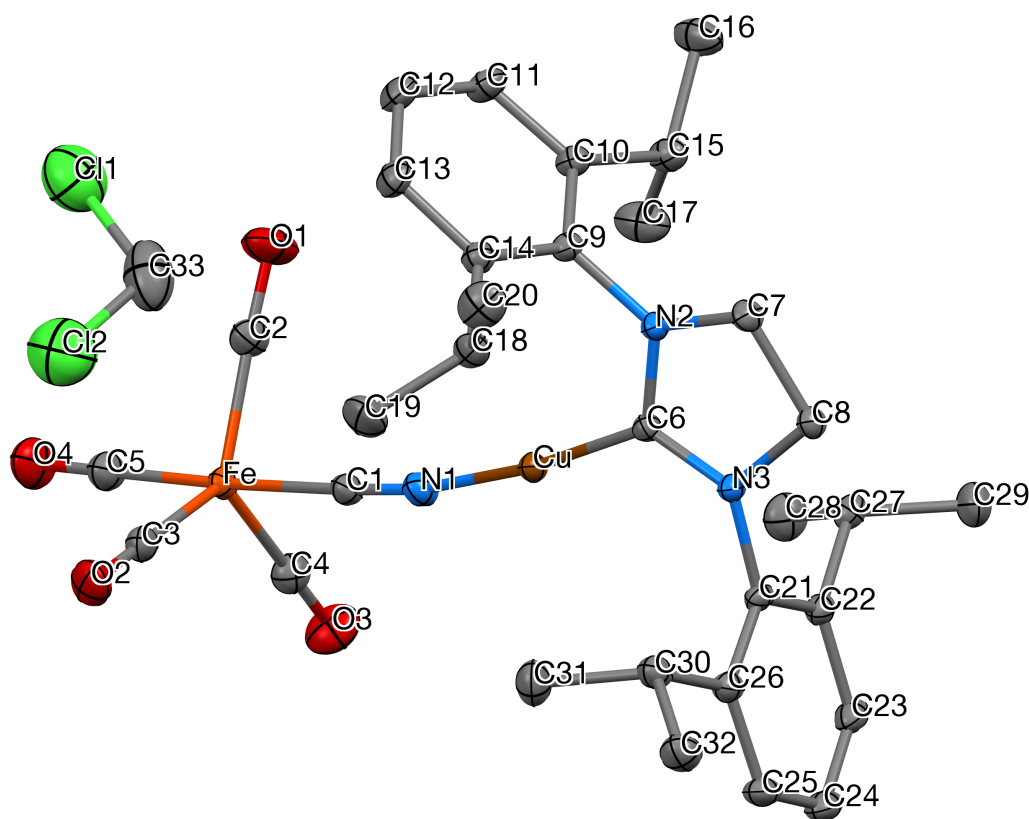

**Table S20. Crystal data and structure refinement for [(SIPr)CuNCFe(CO)<sub>4</sub>] (12)•CH<sub>2</sub>Cl<sub>2</sub>.**

|                                    |                                                                                   |
|------------------------------------|-----------------------------------------------------------------------------------|
| Identification code                | RAD605                                                                            |
| Empirical formula                  | C <sub>33</sub> H <sub>40</sub> Cl <sub>2</sub> CuFeN <sub>3</sub> O <sub>4</sub> |
| Formula weight                     | 732.97                                                                            |
| Temperature/K                      | 99.99                                                                             |
| Crystal system                     | monoclinic                                                                        |
| Space group                        | P2 <sub>1</sub> /n                                                                |
| a/Å                                | 11.1739(7)                                                                        |
| b/Å                                | 18.4203(11)                                                                       |
| c/Å                                | 18.3635(11)                                                                       |
| α/°                                | 90                                                                                |
| β/°                                | 106.685(2)                                                                        |
| γ/°                                | 90                                                                                |
| Volume/Å <sup>3</sup>              | 3620.6(4)                                                                         |
| Z                                  | 4                                                                                 |
| ρ <sub>calc</sub> /cm <sup>3</sup> | 1.345                                                                             |
| μ/mm <sup>-1</sup>                 | 1.173                                                                             |
| F(000)                             | 1520.0                                                                            |

|                                                  |                                                                        |
|--------------------------------------------------|------------------------------------------------------------------------|
| Crystal size/mm <sup>3</sup>                     | 0.48 × 0.26 × 0.25                                                     |
| Radiation                                        | MoK $\alpha$ ( $\lambda$ = 0.71073)                                    |
| 2 $\Theta$ range for data collection/ $^{\circ}$ | 6.406 to 61.016                                                        |
| Index ranges                                     | -15 $\leq$ h $\leq$ 15, -26 $\leq$ k $\leq$ 26, -26 $\leq$ l $\leq$ 26 |
| Reflections collected                            | 50316                                                                  |
| Independent reflections                          | 11033 [R <sub>int</sub> = 0.0229, R <sub>sigma</sub> = 0.0196]         |
| Data/restraints/parameters                       | 11033/0/405                                                            |
| Goodness-of-fit on F <sup>2</sup>                | 1.036                                                                  |
| Final R indexes [ $I \geq 2\sigma(I)$ ]          | R <sub>1</sub> = 0.0324, wR <sub>2</sub> = 0.0856                      |
| Final R indexes [all data]                       | R <sub>1</sub> = 0.0366, wR <sub>2</sub> = 0.0885                      |
| Largest diff. peak/hole / e Å <sup>-3</sup>      | 0.84/-1.21                                                             |

**Table S21. Bond Lengths for [(SIPr)CuNCF<sub>2</sub>(CO)<sub>4</sub>] (12)•CH<sub>2</sub>Cl<sub>2</sub>**

| Atom | Atom | Length/Å   | Atom | Atom | Length/Å   |
|------|------|------------|------|------|------------|
| Cu   | N1   | 1.8378(12) | C11  | C12  | 1.387(2)   |
| Cu   | C6   | 1.8834(12) | C12  | C13  | 1.385(2)   |
| Fe   | C1   | 1.9073(13) | C13  | C14  | 1.3983(18) |
| Fe   | C2   | 1.7945(15) | C14  | C18  | 1.5184(19) |
| Fe   | C3   | 1.8007(15) | C15  | C16  | 1.528(2)   |
| Fe   | C4   | 1.8003(15) | C15  | C17  | 1.528(2)   |
| Fe   | C5   | 1.7880(15) | C18  | C19  | 1.531(2)   |
| O1   | C2   | 1.1408(19) | C18  | C20  | 1.531(2)   |
| O2   | C3   | 1.1454(18) | C21  | C22  | 1.4008(18) |
| O3   | C4   | 1.139(2)   | C21  | C26  | 1.4054(18) |
| O4   | C5   | 1.1401(19) | C22  | C23  | 1.3976(18) |
| N1   | C1   | 1.1535(18) | C22  | C27  | 1.5178(19) |
| N2   | C6   | 1.3377(15) | C23  | C24  | 1.387(2)   |
| N2   | C7   | 1.4806(16) | C24  | C25  | 1.383(2)   |
| N2   | C9   | 1.4399(16) | C25  | C26  | 1.3963(18) |
| N3   | C6   | 1.3335(15) | C26  | C30  | 1.519(2)   |
| N3   | C8   | 1.4791(16) | C27  | C28  | 1.529(2)   |
| N3   | C21  | 1.4362(15) | C27  | C29  | 1.527(2)   |
| C7   | C8   | 1.5334(18) | C30  | C31  | 1.535(2)   |
| C9   | C10  | 1.4054(17) | C30  | C32  | 1.528(2)   |
| C9   | C14  | 1.4032(18) | Cl1  | C33  | 1.766(3)   |
| C10  | C11  | 1.3933(18) | Cl2  | C33  | 1.759(3)   |
| C10  | C15  | 1.5175(19) |      |      |            |

**Table S22. Bond Angles for [(SIPr)CuNCF<sub>2</sub>(CO)<sub>4</sub>] (12)•CH<sub>2</sub>Cl<sub>2</sub>.**

| Atom | Atom | Atom | Angle/°    | Atom | Atom | Atom | Angle/°    |
|------|------|------|------------|------|------|------|------------|
| N1   | Cu   | C6   | 173.56(5)  | C11  | C10  | C15  | 121.62(12) |
| C2   | Fe   | C1   | 85.48(6)   | C12  | C11  | C10  | 120.97(13) |
| C2   | Fe   | C3   | 122.06(7)  | C13  | C12  | C11  | 120.51(13) |
| C2   | Fe   | C4   | 119.16(7)  | C12  | C13  | C14  | 120.80(13) |
| C3   | Fe   | C1   | 88.03(6)   | C9   | C14  | C18  | 122.65(12) |
| C4   | Fe   | C1   | 90.68(6)   | C13  | C14  | C9   | 117.63(12) |
| C4   | Fe   | C3   | 118.42(7)  | C13  | C14  | C18  | 119.72(12) |
| C5   | Fe   | C1   | 177.55(6)  | C10  | C15  | C16  | 113.32(12) |
| C5   | Fe   | C2   | 92.12(7)   | C10  | C15  | C17  | 110.56(13) |
| C5   | Fe   | C3   | 92.82(7)   | C16  | C15  | C17  | 109.62(13) |
| C5   | Fe   | C4   | 90.93(7)   | C14  | C18  | C19  | 111.11(13) |
| C1   | N1   | Cu   | 171.57(12) | C14  | C18  | C20  | 110.90(12) |
| C6   | N2   | C7   | 112.74(10) | C19  | C18  | C20  | 111.12(14) |
| C6   | N2   | C9   | 122.96(10) | C22  | C21  | N3   | 118.71(11) |
| C9   | N2   | C7   | 121.82(10) | C22  | C21  | C26  | 122.86(12) |
| C6   | N3   | C8   | 112.70(10) | C26  | C21  | N3   | 118.36(12) |
| C6   | N3   | C21  | 125.56(10) | C21  | C22  | C27  | 122.37(11) |
| C21  | N3   | C8   | 120.48(10) | C23  | C22  | C21  | 117.50(12) |
| N1   | C1   | Fe   | 177.26(13) | C23  | C22  | C27  | 120.11(12) |
| O1   | C2   | Fe   | 177.73(15) | C24  | C23  | C22  | 120.82(13) |
| O2   | C3   | Fe   | 179.18(13) | C25  | C24  | C23  | 120.43(13) |
| O3   | C4   | Fe   | 178.19(14) | C24  | C25  | C26  | 121.19(13) |
| O4   | C5   | Fe   | 179.14(16) | C21  | C26  | C30  | 121.56(11) |
| N2   | C6   | Cu   | 122.15(9)  | C25  | C26  | C21  | 117.18(13) |
| N3   | C6   | Cu   | 129.16(9)  | C25  | C26  | C30  | 121.18(12) |
| N3   | C6   | N2   | 108.64(11) | C22  | C27  | C28  | 110.46(12) |
| N2   | C7   | C8   | 101.66(10) | C22  | C27  | C29  | 112.00(12) |
| N3   | C8   | C7   | 102.02(10) | C29  | C27  | C28  | 110.98(13) |
| C10  | C9   | N2   | 118.70(11) | C26  | C30  | C31  | 109.37(12) |
| C14  | C9   | N2   | 118.80(11) | C26  | C30  | C32  | 113.54(12) |
| C14  | C9   | C10  | 122.50(12) | C32  | C30  | C31  | 110.05(12) |
| C9   | C10  | C15  | 120.75(12) | C12  | C33  | C11  | 111.91(14) |
| C11  | C10  | C9   | 117.59(12) |      |      |      |            |

**Figure S41.** Molecular structure of  $[(\text{SIPr})\text{H}][\text{Fe}(\text{CO})_4\text{CN}]\cdot\text{THF}$ .

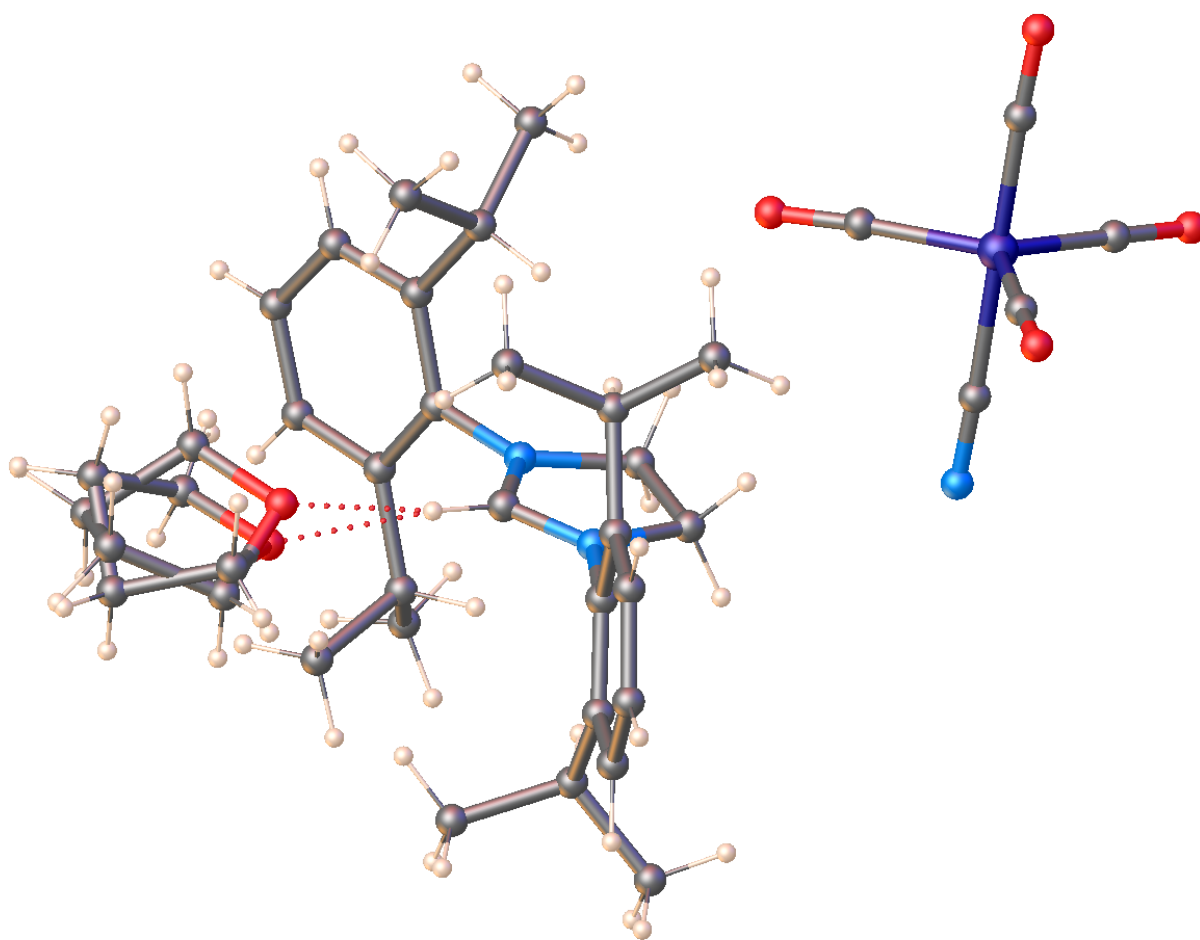

**Figure S42.** Molecular structure and atom numbering scheme for [(SIPr)H][Fe(CO)<sub>4</sub>CN]•THF.

Hydrogen atoms have been omitted for clarity.

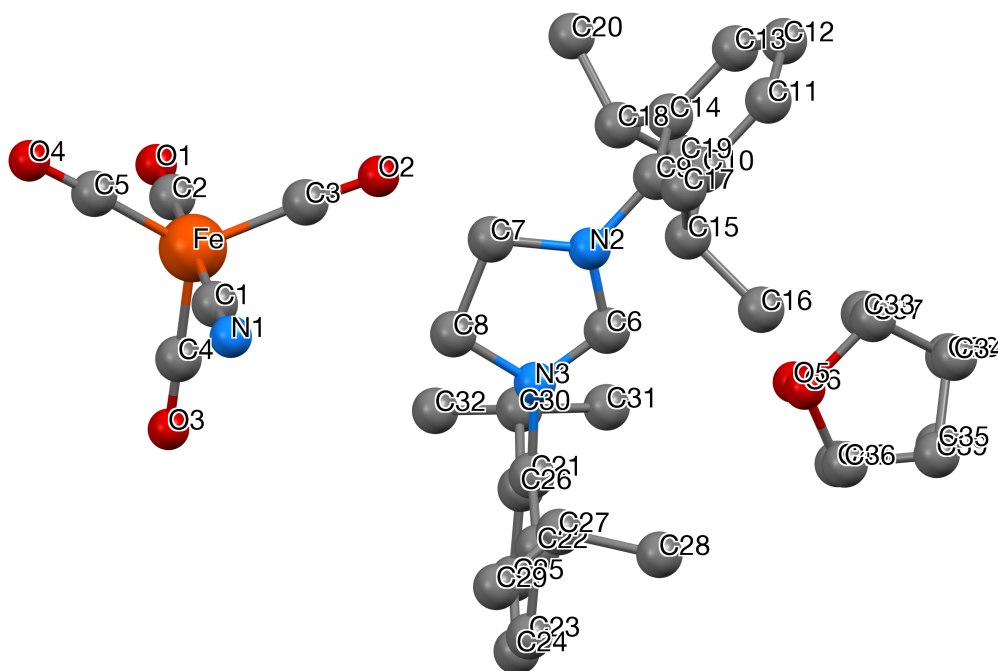

**Table S23.** Crystal data and structure refinement for [(SIPr)H][Fe(CO)<sub>4</sub>CN]•THF.

|                                    |                                                                 |
|------------------------------------|-----------------------------------------------------------------|
| Identification code                | RAD598                                                          |
| Empirical formula                  | C <sub>36</sub> H <sub>47</sub> FeN <sub>3</sub> O <sub>5</sub> |
| Formula weight                     | 657.61                                                          |
| Temperature/K                      | 200.01                                                          |
| Crystal system                     | triclinic                                                       |
| Space group                        | P-1                                                             |
| a/Å                                | 9.9687(5)                                                       |
| b/Å                                | 13.3064(6)                                                      |
| c/Å                                | 14.7378(7)                                                      |
| α/°                                | 91.383(2)                                                       |
| β/°                                | 100.116(2)                                                      |
| γ/°                                | 105.058(2)                                                      |
| Volume/Å <sup>3</sup>              | 1853.45(15)                                                     |
| Z                                  | 2                                                               |
| ρ <sub>calc</sub> /cm <sup>3</sup> | 1.178                                                           |
| μ/mm <sup>-1</sup>                 | 0.448                                                           |

|                                                  |                                                                        |
|--------------------------------------------------|------------------------------------------------------------------------|
| F(000)                                           | 700.0                                                                  |
| Crystal size/mm <sup>3</sup>                     | 0.4 × 0.16 × 0.15                                                      |
| Radiation                                        | MoK $\alpha$ ( $\lambda$ = 0.71073)                                    |
| 2 $\Theta$ range for data collection/ $^{\circ}$ | 6.002 to 56.562                                                        |
| Index ranges                                     | -13 $\leq$ h $\leq$ 13, -17 $\leq$ k $\leq$ 17, -19 $\leq$ l $\leq$ 19 |
| Reflections collected                            | 22318                                                                  |
| Independent reflections                          | 9185 [ $R_{\text{int}}$ = 0.0245, $R_{\text{sigma}}$ = 0.0317]         |
| Data/restraints/parameters                       | 9185/76/460                                                            |
| Goodness-of-fit on F <sup>2</sup>                | 1.042                                                                  |
| Final R indexes [ $I \geq 2\sigma(I)$ ]          | $R_1$ = 0.0510, $wR_2$ = 0.1419                                        |
| Final R indexes [all data]                       | $R_1$ = 0.0666, $wR_2$ = 0.1526                                        |
| Largest diff. peak/hole / e $\text{\AA}^{-3}$    | 0.68/-0.39                                                             |

**Table S24. Bond Lengths for [(SIPr)H][Fe(CO)<sub>4</sub>CN]•THF.**

| Atom | Atom | Length/ $\text{\AA}$ | Atom | Atom | Length/ $\text{\AA}$ |
|------|------|----------------------|------|------|----------------------|
| Fe   | C1   | 1.932(2)             | C14  | C18  | 1.522(3)             |
| Fe   | C4   | 1.771(2)             | C14  | C13  | 1.388(3)             |
| Fe   | C3   | 1.785(3)             | C10  | C15  | 1.516(3)             |
| Fe   | C5   | 1.780(3)             | C10  | C11  | 1.394(3)             |
| Fe   | C2   | 1.770(2)             | C24  | C25  | 1.373(3)             |
| N3   | C6   | 1.303(2)             | C27  | C29  | 1.525(3)             |
| N3   | C21  | 1.442(2)             | C27  | C28  | 1.525(4)             |
| N3   | C8   | 1.477(2)             | C18  | C20  | 1.517(4)             |
| N2   | C6   | 1.306(2)             | C18  | C19  | 1.511(4)             |
| N2   | C7   | 1.480(2)             | C15  | C17  | 1.515(4)             |
| N2   | C9   | 1.440(2)             | C15  | C16  | 1.512(5)             |
| N1   | C1   | 1.155(3)             | C11  | C12  | 1.370(4)             |
| C7   | C8   | 1.528(3)             | C13  | C12  | 1.375(4)             |
| C21  | C22  | 1.396(3)             | C32  | C30  | 1.507(4)             |
| C21  | C26  | 1.394(3)             | C31  | C30  | 1.515(5)             |
| O3   | C4   | 1.140(3)             | O6   | C40  | 1.436(2)             |
| C9   | C14  | 1.396(3)             | O6   | C37  | 1.435(2)             |
| C9   | C10  | 1.393(3)             | C39  | C40  | 1.535(2)             |
| O2   | C3   | 1.144(3)             | C39  | C38  | 1.533(2)             |
| C22  | C23  | 1.392(3)             | C37  | C38  | 1.534(2)             |
| C22  | C27  | 1.518(3)             | O5   | C36  | 1.440(2)             |
| C26  | C25  | 1.391(3)             | O5   | C33  | 1.432(2)             |
| C26  | C30  | 1.518(3)             | C36  | C35  | 1.534(2)             |
| O1   | C2   | 1.152(3)             | C35  | C34  | 1.532(2)             |
| O4   | C5   | 1.142(3)             | C33  | C34  | 1.532(2)             |
| C23  | C24  | 1.374(3)             |      |      |                      |



**Table S25. Bond Angles for [(SIPr)H][Fe(CO)<sub>4</sub>CN]•THF.**

| Atom | Atom | Atom | Angle/°    | Atom | Atom | Atom | Angle/°    |
|------|------|------|------------|------|------|------|------------|
| C4   | Fe   | C1   | 88.83(10)  | C9   | C10  | C15  | 122.62(18) |
| C4   | Fe   | C3   | 119.35(13) | C9   | C10  | C11  | 116.6(2)   |
| C4   | Fe   | C5   | 117.39(13) | C11  | C10  | C15  | 120.69(19) |
| C3   | Fe   | C1   | 85.26(10)  | C25  | C24  | C23  | 120.4(2)   |
| C5   | Fe   | C1   | 88.92(10)  | C22  | C27  | C29  | 112.31(19) |
| C5   | Fe   | C3   | 122.75(13) | C22  | C27  | C28  | 109.0(2)   |
| C2   | Fe   | C1   | 179.73(11) | C29  | C27  | C28  | 111.3(2)   |
| C2   | Fe   | C4   | 90.98(12)  | O3   | C4   | Fe   | 178.4(2)   |
| C2   | Fe   | C3   | 95.01(13)  | C20  | C18  | C14  | 112.0(2)   |
| C2   | Fe   | C5   | 91.00(13)  | C19  | C18  | C14  | 110.4(2)   |
| C6   | N3   | C21  | 126.73(15) | C19  | C18  | C20  | 110.7(3)   |
| C6   | N3   | C8   | 110.30(14) | C17  | C15  | C10  | 112.5(2)   |
| C21  | N3   | C8   | 122.97(14) | C16  | C15  | C10  | 111.0(2)   |
| C6   | N2   | C7   | 110.30(14) | C16  | C15  | C17  | 110.2(2)   |
| C6   | N2   | C9   | 124.98(15) | C24  | C25  | C26  | 121.34(19) |
| C9   | N2   | C7   | 124.69(15) | O2   | C3   | Fe   | 176.6(2)   |
| N3   | C6   | N2   | 113.70(15) | C12  | C11  | C10  | 121.2(2)   |
| N1   | C1   | Fe   | 177.75(17) | O4   | C5   | Fe   | 177.7(3)   |
| N2   | C7   | C8   | 102.67(14) | O1   | C2   | Fe   | 177.7(3)   |
| C22  | C21  | N3   | 118.45(15) | C12  | C13  | C14  | 120.8(2)   |
| C26  | C21  | N3   | 118.44(17) | C11  | C12  | C13  | 120.8(2)   |
| C26  | C21  | C22  | 123.09(17) | C32  | C30  | C26  | 112.1(2)   |
| C14  | C9   | N2   | 118.27(16) | C32  | C30  | C31  | 112.1(3)   |
| C10  | C9   | N2   | 118.41(17) | C31  | C30  | C26  | 110.6(3)   |
| C10  | C9   | C14  | 123.32(17) | N3   | C8   | C7   | 102.98(14) |
| C21  | C22  | C27  | 121.93(17) | C37  | O6   | C40  | 110.6(5)   |
| C23  | C22  | C21  | 117.12(17) | C38  | C39  | C40  | 94.4(3)    |
| C23  | C22  | C27  | 120.79(18) | O6   | C40  | C39  | 94.1(5)    |
| C21  | C26  | C30  | 122.27(18) | O6   | C37  | C38  | 101.3(4)   |
| C25  | C26  | C21  | 116.95(19) | C39  | C38  | C37  | 93.2(3)    |
| C25  | C26  | C30  | 120.77(18) | C33  | O5   | C36  | 102.0(6)   |
| C24  | C23  | C22  | 121.0(2)   | O5   | C36  | C35  | 103.8(5)   |
| C9   | C14  | C18  | 122.57(18) | C34  | C35  | C36  | 93.7(3)    |
| C13  | C14  | C9   | 117.17(19) | O5   | C33  | C34  | 109.0(6)   |
| C13  | C14  | C18  | 120.26(19) | C33  | C34  | C35  | 93.9(3)    |

**Figure S43.** Molecular structure and atom numbering scheme for  $(\text{IPr}^*)\text{AuNCFe}(\text{CO})_4$ . Hydrogen atoms have been omitted for clarity. *These are poorly diffracting crystals with low data quality. The molecular structure has been included only to show the atom connectivity.*

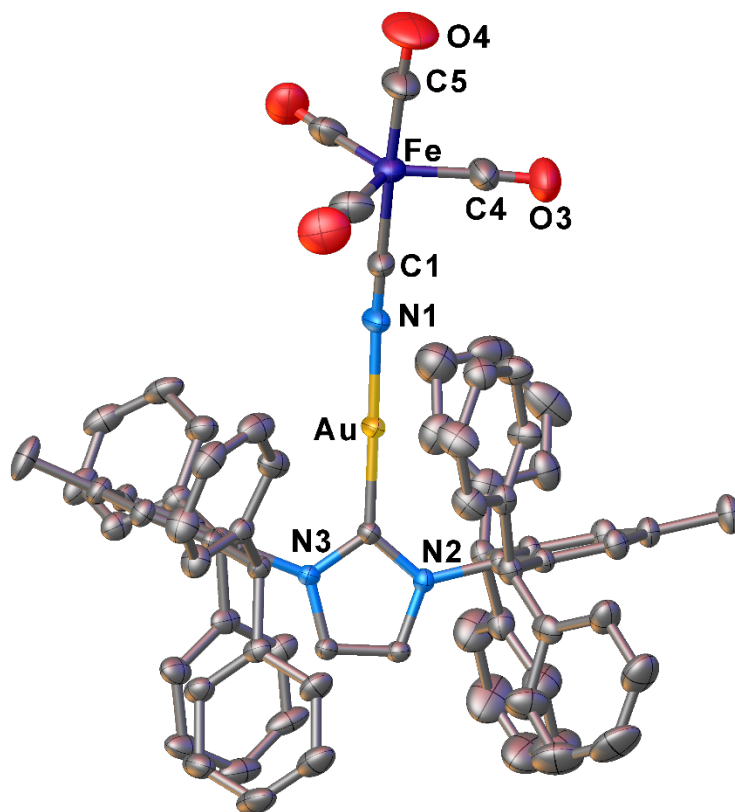

**Table S26. Crystal data and structure refinement for  $(\text{IPr}^*)\text{AuNCFe}(\text{CO})_4$**

|                     |                                                      |
|---------------------|------------------------------------------------------|
| Identification code | RAD650                                               |
| Empirical formula   | $\text{C}_{74}\text{H}_{56}\text{AuFeN}_3\text{O}_4$ |
| Formula weight      | 1304.03                                              |
| Temperature/K       | 299.07                                               |
| Crystal system      | orthorhombic                                         |
| Space group         | Pbcn                                                 |
| a/Å                 | 35.042(3)                                            |
| b/Å                 | 17.2901(14)                                          |
| c/Å                 | 24.913(2)                                            |
| $\alpha$ /°         | 90                                                   |

|                                               |                                                                |
|-----------------------------------------------|----------------------------------------------------------------|
| $\beta/^\circ$                                | 90                                                             |
| $\gamma/^\circ$                               | 90                                                             |
| Volume/ $\text{\AA}^3$                        | 15094(2)                                                       |
| Z                                             | 8                                                              |
| $\rho_{\text{calc}}/\text{g}/\text{cm}^3$     | 1.148                                                          |
| $\mu/\text{mm}^{-1}$                          | 2.176                                                          |
| F(000)                                        | 5264.0                                                         |
| Crystal size/ $\text{mm}^3$                   | $0.25 \times 0.17 \times 0.06$                                 |
| Radiation                                     | MoK $\alpha$ ( $\lambda = 0.71073$ )                           |
| $2\Theta$ range for data collection/ $^\circ$ | 5.464 to 52.746                                                |
| Index ranges                                  | $-43 \leq h \leq 43, -21 \leq k \leq 21, -31 \leq l \leq 31$   |
| Reflections collected                         | 144906                                                         |
| Independent reflections                       | 15415 [ $R_{\text{int}} = 0.1087, R_{\text{sigma}} = 0.0539$ ] |
| Data/restraints/parameters                    | 15415/0/750                                                    |
| Goodness-of-fit on $F^2$                      | 1.045                                                          |
| Final R indexes [ $I \geq 2\sigma(I)$ ]       | $R_1 = 0.0751, wR_2 = 0.2053$                                  |
| Final R indexes [all data]                    | $R_1 = 0.1304, wR_2 = 0.2526$                                  |
| Largest diff. peak/hole / $e \text{\AA}^{-3}$ | 5.99/-1.90                                                     |

## References

- <sup>1</sup> a) Becke, A. D. *Phys. Rev. A* **1988**, *38*, 3098–3100; (b) Perdew, J. P. *Phys. Rev. B* **1986**, *33*, 8822–8824; (c) Grimme, S.; Ehrlich, S.; Goerigk, L. *J. Comput. Chem.* **2011**, *32*, 1456–1465; (d) Grimme, S.; Antony, J.; Ehrlich, S.; Krieg, H. *J. Chem. Phys.* **2010**, *132*, 154104; (e) Weigend, F.; Ahlrichs, R. *Phys. Chem. Chem. Phys.* **2005**, *7*, 3297–3305; (f) Weigend, F. *Phys. Chem. Chem. Phys.* **2006**, *8*, 1057–1065.
- <sup>2</sup> Gaussian 16, Revision A.03, Frisch, M. J. et al. Gaussian, Inc., Wallingford CT (2016).
- <sup>3</sup> a) F. Weinhold, C. Landis, Valency and Bonding, A Natural Bond Orbital Donor – Acceptor Perspective, Cambridge University Press, Cambridge, 2005; b) C. R. Landis and F. Weinhold, "The NBO View of Chemical Bonding", in, G. Frenking and S. Shaik (eds.), The Chemical Bond: Fundamental Aspects of Chemical Bonding (Wiley, 2014), pp. 91–120.
- <sup>4</sup> E. D. Glendening, C. R. Landis, F. Weinhold, *J. Comput. Chem.* **2013**, *34*, 1429.
- <sup>5</sup> Ziegler, T.; Rauk, A. *Theor. Chim. Acta*, **1977**, *46*, 1–10.
- <sup>6</sup> (a) Mitoraj, M.; Michalak, A. *Organometallics* **2007**, *26*, 6576–6580; (b) Mitoraj, M.; Michalak, A. *J. Mol. Model.* **2008**, *14*, 681–687.
- <sup>7</sup> (a) ADF2017, SCM, Theoretical Chemistry, Vrije Universiteit, Amsterdam, The Netherlands, <http://www.scm.com>; (b) te Velde, G., Bickelhaupt, F. M., Baerends, E. J., Guerra, C. F., van Gisbergen, S. J. A., Snijders, J. G. & Ziegler, T. *J. Comput. Chem.* **2001**, *22*, 931–967.
- <sup>8</sup> (a) van Lenthe, E.; Baerends, E. J. *J. Comput. Chem.* **2003**, *24*, 1142–1156; (b) van Lenthe, E.; Baerends, E. J.; Snijders, J. G. *J. Chem. Phys.* **1993**, *99*, 4597; (c) van Lenthe, E.; Baerends, E. J.; Snijders, J. G. *J. Chem. Phys.* **1994**, *101*, 9783.
- <sup>9</sup> (a) Frenking, G.; Bickelhaupt, F. M. *The Chemical Bond I. Fundamental Aspects of Chemical Bonding*, chap. The EDA Perspective of Chemical Bonding, 121–158. Wiley-VCH: Weinheim (2014); (b) Zhao, L., M. von Hopffgarten, Andrada, D. M.; Frenking, G. *WIREs Comput. Mol. Sci.* **2018**, *8*, 1345; (c) Zhao, L.; Hermann, M.; Schwarz, W.H.E.; Frenking, G. *Nat. Rev. Chem.* **2019**, *3*, 48; (d) Zhao, L.; Pan, S.; Holzmann, N.; Schwerdtfeger, P.; Frenking, G. *Chem. Rev.* **2019**, *119*, 8781–8845.
- <sup>10</sup> M. D. Curtis, K. R. Han and W. M. Butler, *Inorg. Chem.*, 1980, **19**, 2096–2101.
